# Supplementary material for: Primary versus castration-resistant prostate cancer: modeling through novel murine prostate cancer cell lines
Source: PubMed Central journal article supplement (PMC5045370; doi:10.18632/oncotarget.8436), 2016-03-28
Supplement: oncotarget-07-28961-s001.pdf [file oncotarget-07-28961-s001.pdf]

## **Primary versus castration-resistant prostate cancer: modeling through novel murine prostate cancer cell lines**

**Supplementary Materials**

**Supplementary Table S1: Differentially expressed (DE) genes**

| Gene Row Names | Chromosome Number | Gene Symbol    | Gene Description                                             | logFC        | Fold Change  | t-value       | Adjusted P value | OIAI.3       | OIAI.2       | OIAI.1       | OIAI.3       | OIAI.2       | OIAI.1       | OIAI.3 | OIAI.2 | OIAI.1 | OIAI.3 | OIAI.2 | OIAI.1 |
|----------------|-------------------|----------------|--------------------------------------------------------------|--------------|--------------|---------------|------------------|--------------|--------------|--------------|--------------|--------------|--------------|--------|--------|--------|--------|--------|--------|
| 17383886       | 2                 | I1110008P14Rik | RIKEN cDNA 11110008P14 gene                                  | 2.327299300  | 5.018649872  | 7.904444720   | 0.000837940      | -1.130256388 | -0.884145546 | -0.684960319 | 1.066069220  | 0.842238180  | 0.791054853  |        |        |        |        |        |        |
| 17358094       | 19                | I500015L24Rik  | RIKEN cDNA 1500015L24 gene                                   | -2.641467850 | 0.160265095  | -8.922081004  | 0.000398122      | 0.717311575  | 0.943681310  | 1.045303159  | -1.063158390 | -0.716653238 | -0.926484414 |        |        |        |        |        |        |
| 17219902       | 1                 | I700016C15Rik  | RIKEN cDNA 1700016C15 gene                                   | -2.212365353 | 0.215780238  | -7.394346208  | 0.001187575      | 0.565619692  | 1.116812204  | 1.005837307  | -0.986116450 | -0.849011934 | -0.853140820 |        |        |        |        |        |        |
| 17419613       | 4                 | I810019J16Rik  | RIKEN cDNA 1810019J16 gene                                   | -2.657722778 | 0.158469513  | -8.760932175  | 0.000451699      | 0.916727854  | 0.815530141  | 0.966823097  | -1.194831080 | -0.771725613 | -0.732524399 |        |        |        |        |        |        |
| 17268332       | 11                | I2010300F17Rik | RIKEN cDNA 2010300F17 gene                                   | -4.696390111 | 0.038569651  | -14.961702079 | 2.22E-05         | 0.841383477  | 0.997998196  | 0.882680496  | -1.045829260 | -0.742431135 | -0.933801774 |        |        |        |        |        |        |
| 17305163       | 14                | I2610528A11Rik | RIKEN cDNA 2610528A11 gene                                   | 4.921493588  | 30.305202721 | 10.382298245  | 0.000172657      | -0.932284408 | -1.218133811 | -0.509983869 | 0.846745060  | 1.019209900  | 0.794447128  |        |        |        |        |        |        |
| 17517903       | 9                 | I4930461G14Rik | RIKEN cDNA 4930461G14 gene                                   | 2.038999174  | 4.109603405  | 5.583190597   | 0.005481326      | -0.753444336 | -1.018762050 | -0.789568157 | 0.300929661  | 0.880663365  | 1.380181517  |        |        |        |        |        |        |
| 17217048       | 1                 | I5430435G22Rik | RIKEN cDNA 5430435G22 gene                                   | 2.553130806  | 5.869065487  | 6.980406265   | 0.001605940      | -1.314597231 | -0.812935477 | -0.493572338 | 0.693742254  | 1.083502919  | 0.843859873  |        |        |        |        |        |        |
| 17271307       | 11                | Abca8b         | ATP-binding cassette, sub-family A (ABC1), member 8b         | 2.482434471  | 5.588396837  | 9.237914265   | 0.000323310      | -0.827651549 | -0.888889011 | -1.016815700 | 0.929932276  | 0.89926281   | 0.904161176  |        |        |        |        |        |        |
| 17267846       | 11                | Abcc3          | ATP-binding cassette, sub-family C (CFTR/MRP), member 3      | 3.548976979  | 11.704383001 | 9.987288839   | 0.00021174       | -1.01602649  | -1.093057433 | -0.573909942 | 0.732049312  | 1.023192697  | 0.927751857  |        |        |        |        |        |        |
| 17326318       | 16                | Abi3bp         | ABI gene family, member 3 (NESH) binding protein             | 2.626710191  | 6.176160272  | 7.732791844   | 0.000937748      | -1.164152790 | -0.895502226 | -0.598112412 | 1.179558102  | 0.714847055  | 0.763362273  |        |        |        |        |        |        |
| 17364098       | 19                | Acta2          | actin, alpha 2, smooth muscle, aorta                         | 2.078457471  | 4.223553924  | 6.209633463   | 0.003199180      | -0.971970686 | -0.645180842 | -1.004266680 | 0.413585797  | 1.209149074  | 0.998683337  |        |        |        |        |        |        |
| 17497246       | 7                 | Adam12         | a disintegrin and metallopeptidase domain 12 (meltrin alpha) | -2.836737910 | 0.139977038  | -9.891267083  | 0.000222185      | 0.871363371  | 0.851629266  | 0.995878039  | -1.077199475 | -0.909659936 | -0.732011265 |        |        |        |        |        |        |
| 17279349       | 12                | Adss1l         | adenylosuccinate synthetase like 1                           | 2.615602641  | 6.128791565  | 6.867275278   | 0.001806848      | -1.386160980 | -0.626308426 | -0.595462794 | 1.043136499  | 0.880614460  | 0.684181241  |        |        |        |        |        |        |
| 17247039       | 11                | Aebp1          | AE binding protein 1                                         | 6.078735110  | 67.589868865 | 20.650313439  | 1.13E-05         | -0.847928007 | -1.008628977 | -0.876208104 | 0.925152601  | 0.847653537  | 0.959958950  |        |        |        |        |        |        |
| 17254194       | 11                | A1662270       | expressed sequence A1662270                                  | -3.091961573 | 0.117280773  | -10.605129335 | 0.000156631      | 0.880343735  | 1.047568986  | 0.790451892  | -0.746439609 | -0.959849921 | -1.012075083 |        |        |        |        |        |        |
| 17284919       | 13                | Akr1c14        | aldo-keto reductase family 1, member C14                     | 2.640421359  | 6.235137428  | 7.354432753   | 0.001219757      | -1.14838308  | -0.868048686 | -0.619790636 | 0.794220865  | 1.249859199  | 0.592142338  |        |        |        |        |        |        |

|          |    |          |                                                          |              |              |                |             |              |              |              |               |              |              |
|----------|----|----------|----------------------------------------------------------|--------------|--------------|----------------|-------------|--------------|--------------|--------------|---------------|--------------|--------------|
| 17290263 | 13 | Akr1e18  | aldo-keto reductase family 1, member C18                 | 6.393182374  | 84.050376307 | 14.526272481   | 2.78E-05    | -0.990437751 | -1.027710138 | -0.682537498 | 0.7596665410  | 0.836128654  | 1.104891324  |
| 17250567 | 11 | Aldh3a1  | aldehyde dehydrogenase family 3, subfamily A1            | 2.389494695  | 5.239738071  | 4.533977256    | 0.014145415 | -1.274897428 | -0.974560334 | -0.116623432 | 0.359468924   | 0.636697781  | 1.369914489  |
| 17361041 | 19 | Aldh3b1  | aldehyde dehydrogenase 3 family, member B1               | 2.438179242  | 5.419573200  | 7.273922317    | 0.001287311 | -1.262163701 | -0.869558439 | -0.519598521 | 0.735411338   | 0.909766547  | 1.006142775  |
| 17431720 | 4  | Alpl     | alkaline phosphatase, liver/bone/kidney                  | 2.016366870  | 4.045636978  | 6.535308243    | 0.002405423 | -0.894350392 | -0.917076783 | -0.850406502 | 0.495161320   | 0.935862372  | 1.230809986  |
| 17545159 | X  | Amot     | angiotensin                                              | -2.170506248 | 0.222132709  | -5.995285045   | 0.00378791  | 1.149365842  | 0.357824275  | 1.078843119  | -0.808361093  | -0.611788519 | -1.165883624 |
| 17316780 | 15 | Angpt1   | angiotensin 1                                            | 2.493427025  | 5.631140024  | 7.776241054    | 0.000906140 | -1.219468433 | -0.891036514 | -0.562495627 | 0.789979111   | 0.994413624  | 0.888607839  |
| 17310673 | 15 | Ank      | progressive ankylosis                                    | 2.133022752  | 4.386355528  | 7.861799196    | 0.000854367 | -0.976190712 | -0.982284798 | -0.769136375 | 0.908892842   | 0.836414930  | 0.982304114  |
| 17364090 | 19 | Ankrd22  | ankyrin repeat domain 22                                 | -4.196271387 | 0.054550212  | -13.4973335908 | 4.31E-05    | 0.730664069  | 0.916429986  | 1.072163234  | -0.841422187  | -0.991966895 | -0.885868207 |
| 17498467 | 7  | Ano1     | anoctamin 1, calcium activated chloride channel          | -3.125317641 | 0.114600271  | -9.395568190   | 0.000294106 | 0.942189951  | 0.724632882  | 1.019762574  | -1.178953553  | -0.855946217 | -0.651685637 |
| 17468573 | 6  | Antrx1   | anthrax toxin receptor I                                 | 4.706055321  | 26.101400636 | 15.449234010   | 1.93E-05    | -1.022198361 | -0.868910446 | -0.834274826 | 1.041189681   | 0.812431507  | 0.871762443  |
| 17524703 | 9  | Ap1m2    | adaptor protein complex AP-1, mu 2 subunit               | -3.517932540 | 0.087296490  | -10.784609040  | 0.000144261 | 0.820022847  | 0.727034934  | 1.154434891  | -0.7933399152 | -1.044518202 | -0.863575318 |
| 17351196 | 18 | Apcdd1   | adenomatosis polyposis coli down-regulated 1             | 2.517598474  | 5.726281025  | 7.730990891    | 0.000937748 | -0.533765923 | -1.047647417 | -1.086755073 | 1.034880739   | 0.942540196  | 0.690747477  |
| 17276776 | 12 | Arg2     | arginase type II                                         | 2.876009436  | 7.341167071  | 9.641700769    | 0.000253442 | -1.121685952 | -0.735145055 | -0.852464221 | 0.999684680   | 0.938272496  | 0.771338052  |
| 17506147 | 8  | Atp2c2   | ATPase, Ca <sup>++</sup> transporting, type 2C, member 2 | -2.055624216 | 0.240544511  | -5.042614585   | 0.008872274 | 0.297926998  | 0.904567399  | 1.284190906  | -1.328209308  | -0.513367828 | -0.645108167 |
| 17355026 | 18 | Atp8b1   | ATPase, class I, type 8B, member 1                       | -3.345072584 | 0.098408546  | -11.373104461  | 0.000110941 | 0.801148967  | 0.837692916  | 1.080761586  | -0.994542320  | -0.787188357 | -0.937872791 |
| 17470394 | 6  | B4galnt3 | beta-1,4-N-acetyl-galactosaminyl transferase 3           | -3.034704921 | 0.122028927  | -10.017265665  | 0.000207942 | 0.918210479  | 0.971880249  | 0.818384653  | -1.145360346  | -0.714214255 | -0.848900779 |
| 17539682 | X  | BC022960 | cDNA sequence BC022960                                   | 2.337749938  | 5.055136112  | 6.173557868    | 0.003276747 | -1.422035656 | -0.479271238 | -0.679833915 | 0.956185255   | 0.972804010  | 0.652151544  |
| 17475580 | 7  | Blvrb    | biliverdin reductase B (flavin reductase (NADPH))        | 2.200857949  | 4.597526686  | 6.99440969     | 0.001594693 | -1.141914593 | -0.567545581 | -0.954960706 | 0.717596735   | 1.134604388  | 0.812219757  |

|          |    |         |                                                                   |              |              |               |             |              |              |              |              |              |              |
|----------|----|---------|-------------------------------------------------------------------|--------------|--------------|---------------|-------------|--------------|--------------|--------------|--------------|--------------|--------------|
| 17414572 | 4  | Bspry   | B-box and SPRY domain containing                                  | -2.167785772 | 0.222551978  | -8.098061241  | 0.000730768 | 0.906345213  | 0.980598803  | 0.846272871  | -0.832674501 | -0.923728147 | -0.976814239 |
| 17319022 | 15 | C1qtm6  | C1q and tumor necrosis factor related protein 6                   | 3.073370120  | 8.417373415  | 11.255984478  | 0.000117069 | -0.818601987 | -0.930348272 | -0.983083981 | 0.966782369  | 0.933437033  | 0.831814838  |
| 17267885 | 11 | Caena1g | calcium channel, voltage-dependent, T type, alpha 1G subunit      | 3.327650179  | 10.039741226 | 9.099749854   | 0.000350540 | -0.556616985 | -0.940294736 | -1.170724303 | 1.047491258  | 0.923552515  | 0.696592252  |
| 17473155 | 7  | Caeng7  | calcium channel, voltage-dependent, gamma subunit 7               | 2.297954866  | 4.917601621  | 8.240839717   | 0.000647518 | -1.008051531 | -0.744241348 | -0.966971955 | 1.035451685  | 0.791267588  | 0.892545560  |
| 17498673 | 8  | Camsap3 | calmodulin regulated spectrin-associated protein family, member 3 | -2.186559288 | 0.219674713  | -7.651879532  | 0.000992518 | 0.853085068  | 0.795213592  | 1.058859190  | -0.926078396 | -0.696948379 | -1.084131075 |
| 17310250 | 15 | Caps1   | calyphosine-like                                                  | -2.126763090 | 0.228971019  | -7.326306769  | 0.001230195 | 0.635525483  | 1.036149100  | 1.026640925  | -0.739581992 | -0.939299327 | -1.019434188 |
| 17545936 | X  | Car5b   | carbonic anhydrase 5b, mitochondrial                              | 2.016520793  | 4.046068636  | 4.918380830   | 0.009798782 | -1.592753009 | -0.326180694 | -0.554799775 | 0.891021012  | 0.826946930  | 0.755765537  |
| 17514424 | 9  | Casp1   | caspase 1                                                         | 6.316517526  | 79.700536250 | 20.187648010  | 1.13E-05    | -0.945085899 | -0.818398518 | -0.966141186 | 0.806004698  | 0.918190205  | 1.005430700  |
| 17514435 | 9  | Casp4   | caspase 4, apoptosis-related cysteine peptidase                   | 2.032786496  | 4.091944267  | 4.124358252   | 0.021065449 | -1.732935126 | -0.243398652 | -0.345856595 | 0.774604203  | 0.672419977  | 0.875166193  |
| 17327264 | 16 | Cbr3    | carbonyl reductase 3                                              | 2.987761400  | 7.932421837  | 7.757605802   | 0.000919003 | -1.096544202 | -0.712079122 | -0.824003363 | 0.443114478  | 1.190203201  | 0.999309008  |
| 17366536 | 2  | Ccdc3   | coiled-coil domain containing 3                                   | -2.087608094 | 0.235270429  | -5.992359653  | 0.003793797 | 0.372871998  | 1.228560994  | 0.997272158  | -0.685901692 | -0.787311608 | -1.125491849 |
| 17351634 | 18 | Ccdc68  | coiled-coil domain containing 68                                  | -2.398594002 | 0.189649306  | -7.354207961  | 0.001219757 | 0.596893627  | 0.871945385  | 1.191800071  | -1.149289167 | -0.749081046 | -0.762268871 |
| 17325904 | 16 | Ccdc80  | coiled-coil domain containing 80                                  | 3.770774907  | 13.649487773 | 12.618868700  | 6.25E-05    | -1.052953880 | -0.732986004 | -0.935223447 | 0.844725817  | 0.989726877  | 0.886710636  |
| 17254041 | 11 | Ccl2    | chemokine (C-C motif) ligand 2                                    | 3.157552587  | 8.923146873  | 9.489827785   | 0.000271849 | -0.853591991 | -0.961135707 | -0.872810522 | 0.555977442  | 1.016211909  | 1.115348869  |
| 17266946 | 11 | Ccl5    | chemokine (C-C motif) ligand 5                                    | 2.947119211  | 7.712075688  | 5.555801922   | 0.005632645 | -1.556733282 | -0.601330122 | -0.314053282 | 0.700528332  | 1.053514964  | 0.718093390  |
| 17254047 | 11 | Ccl7    | chemokine (C-C motif) ligand 7                                    | 3.124316078  | 8.719927126  | 10.615719376  | 0.000156631 | -0.964051282 | -1.065539931 | -0.687122131 | 0.861776845  | 0.931879584  | 0.923056916  |
| 17531705 | 9  | Ccr12   | chemokine (C-C motif) receptor-like 2                             | 2.399138839  | 5.274882067  | 4.739406596   | 0.011779296 | -1.658326571 | -0.423483498 | -0.318136629 | 0.624969006  | 0.845389933  | 0.929587758  |
| 17264835 | 11 | Cd68    | CD68 antigen                                                      | 2.519993387  | 5.735794700  | 4.058456904   | 0.022681731 | -1.388561776 | -0.426699402 | -0.448417966 | 1.358906386  | 0.917580802  | -0.012808043 |
| 17505148 | 8  | Cdh1    | cadherin 1                                                        | -4.831955407 | 0.035110457  | -17.612115546 | 1.13E-05    | 0.890376909  | 0.883730637  | 0.961447081  | -0.906091792 | -0.975555604 | -0.853907232 |
| 17310530 | 15 | Cdh10   | cadherin 10                                                       | -3.260109075 | 0.104378098  | -11.283700463 | 0.000116004 | 0.917707696  | 0.756941988  | 1.047529127  | -1.009447347 | -0.826152655 | -0.886578809 |
| 17411848 | 4  | Cdh17   | cadherin 17                                                       | 2.139492682  | 4.406070813  | 5.448283415   | 0.006187456 | -0.761309488 | -0.804598458 | -0.963625032 | 0.338931580  | 0.688967013  | 1.501634384  |

|          |    |        |                                                              |              |              |               |             |              |              |              |              |              |              |
|----------|----|--------|--------------------------------------------------------------|--------------|--------------|---------------|-------------|--------------|--------------|--------------|--------------|--------------|--------------|
| 17305143 | 14 | Cdhr1  | cadherin-related family member 1                             | 3.263574195  | 9.603592545  | 9.695192117   | 0.000245044 | -0.92410581  | -1.173540605 | -0.590118738 | 0.805876092  | 0.926779734  | 0.955109327  |
| 17462373 | 6  | Cecr2  | cat eye syndrome chromosome region, candidate 2              | 2.307791891  | 4.951246895  | 6.964204731   | 0.001631058 | -0.917101145 | -0.807654593 | -0.922442170 | 1.321252147  | 0.787364744  | 0.538581018  |
| 17479027 | 7  | Cers3  | ceramide synthase 3                                          | -2.485315208 | 0.178585245  | -7.407826314  | 0.001181366 | 0.744918621  | 0.915773809  | 0.993374784  | -1.302197218 | -0.747234643 | -0.604635354 |
| 17504572 | 8  | Ces2g  | carboxylesterase 2G                                          | 2.272052289  | 4.830097423  | 6.755504373   | 0.001989968 | -1.083224653 | -1.085565757 | -0.468334530 | 0.634203754  | 0.899546254  | 1.103374933  |
| 17344064 | 17 | Cfb    | complement factor B                                          | 2.212842985  | 4.635879236  | 7.849811348   | 0.000861584 | -1.049202338 | -0.715423558 | -0.948795827 | 0.798277024  | 0.868145701  | 1.046998998  |
| 17227696 | 1  | Cfh    | complement component factor h                                | 2.883299494  | 7.378356485  | 7.008632206   | 0.001573813 | -0.631341298 | -1.250193644 | -0.715919966 | 1.293351131  | 0.689347321  | 0.614756277  |
| 17407594 | 3  | Cgn    | cingulin                                                     | -2.715020068 | 0.152299165  | -9.225417925  | 0.000325097 | 0.992322348  | 0.872277818  | 0.845137097  | -0.843462363 | -0.724269917 | -1.142004983 |
| 17217399 | 1  | Chi3l1 | chitinase 3-like 1                                           | 2.799848768  | 6.963674493  | 9.240998635   | 0.000323310 | -0.878706268 | -1.032997303 | -0.791573233 | 0.860709542  | 1.140207943  | 0.702359320  |
| 17264946 | 11 | Chrb1  | cholinergic receptor, nicotinic, beta polypeptide 1 (muscle) | -2.667378417 | 0.157412453  | -7.887954178  | 0.000841782 | 1.070498020  | 0.517192632  | 1.074121283  | -1.091917446 | -0.720755424 | -0.849139065 |
| 17453496 | 5  | Cldn4  | claudin 4                                                    | -5.768219620 | 0.018348175  | -18.246568899 | 1.13E-05    | 0.829121269  | 0.971832211  | 0.926121604  | -0.893608687 | -0.792108058 | -1.041358339 |
| 17334097 | 17 | Cldn6  | claudin 6                                                    | -5.426760389 | 0.023247826  | -12.937919712 | 5.44E-05    | 0.935656681  | 0.851843989  | 0.906187590  | -1.096201124 | -0.575032852 | -1.022454284 |
| 17251829 | 11 | Cldn7  | claudin 7                                                    | -3.809984686 | 0.071298489  | -13.116427791 | 5.21E-05    | 0.949652414  | 0.804329327  | 0.971789361  | -0.977974443 | -0.766638201 | -0.981158459 |
| 17302869 | 14 | Clybl  | citrate lyase beta like                                      | 2.048298151  | 4.136177649  | 4.858649155   | 0.010431024 | -1.560301422 | -0.472038619 | -0.426940187 | 0.834745079  | 1.080599942  | 0.543935207  |
| 17255260 | 11 | Col1a1 | collagen, type I, alpha 1                                    | 4.2144445908 | 18.564131383 | 12.608481036  | 6.25E-05    | -0.748694597 | -0.930424497 | -1.029761996 | 1.060662980  | 0.946664068  | 0.701554041  |
| 17225413 | 1  | Col6a3 | collagen, type VI, alpha 3                                   | 3.478642875  | 11.147458123 | 11.101200366  | 0.000126154 | -0.781555481 | -1.035832502 | -0.891624760 | 1.099681804  | 0.896736742  | 0.712594197  |
| 17398895 | 3  | Crabp2 | cellular retinoic acid binding protein II                    | 2.999022168  | 7.994579585  | 10.583053468  | 0.000156631 | -1.062844495 | -0.887301157 | -0.773495634 | 0.903655908  | 0.987437363  | 0.832548015  |
| 17219005 | 1  | Creg1  | cellular repressor of E1A-stimulated genes 1                 | 2.854402583  | 7.232039630  | 10.262444256  | 0.000181589 | -0.939467429 | -1.009790666 | -0.777378439 | 0.808134221  | 0.959110982  | 0.959391332  |
| 17351053 | 18 | Csf1r  | colony stimulating factor 1 receptor                         | -2.286197422 | 0.205015171  | -6.837133228  | 0.001854555 | 0.630085656  | 0.657837015  | 1.353241305  | -0.958094083 | -0.793191923 | -0.889877969 |
| 17232235 | 10 | Ctgf   | connective tissue growth factor                              | -3.699451888 | 0.076975765  | -10.916556469 | 0.000135248 | 0.888852820  | 0.903760518  | 0.904817869  | -0.974907544 | -0.596239558 | -1.126284105 |
| 17438113 | 5  | Cwh43  | cell wall biogenesis 43 C-terminal homolog (S. cerevisiae)   | -3.073221889 | 0.118814113  | -9.701653465  | 0.000245044 | 0.610266716  | 0.958894796  | 1.128912322  | -0.855651125 | -0.875098922 | -0.967327386 |
| 17438975 | 5  | Cxcl3  | chemokine (C-X-C motif) ligand 3                             | -2.655507117 | 0.158713074  | -6.563673190  | 0.002359580 | 0.934819814  | 0.824308246  | 0.823702995  | -1.458672584 | -0.496698172 | -0.627460300 |
| 17427389 | 4  | Cyp2j6 | cytochrome P450, family 2, subfamily J, polypeptide 6        | 2.418220172  | 5.345111977  | 7.405526592   | 0.001181366 | -0.803652346 | -1.134864720 | -0.722819994 | 0.893626520  | 0.581541197  | 1.186169343  |

|          |    |               |                                                                |              |              |               |             |              |              |              |              |              |              |
|----------|----|---------------|----------------------------------------------------------------|--------------|--------------|---------------|-------------|--------------|--------------|--------------|--------------|--------------|--------------|
| 17239546 | 10 | D10Bwg1379e   | DNA segment, Chr 10, Brigham & Women's Genetics 1379 expressed | -2.011430009 | 0.248027156  | -6.711934017  | 0.002066977 | 1.026685706  | 0.628578430  | 1.021939815  | -0.622462002 | -0.964111779 | -1.090630170 |
| 17538079 | X  | D330045A20Rik | RIKEN cDNA D330045A20 gene                                     | 3.153696104  | 8.899326170  | 10.460308568  | 0.000169189 | -1.110774256 | -0.712351271 | -0.888642729 | 0.797078568  | 0.938666304  | 0.976023383  |
| 17308794 | 5  | D5Erd579e     | DNA segment, Chr 5, ERATO Doi 579, expressed                   | 2.250347174  | 4.757973294  | 6.086939526   | 0.003503610 | -0.987245798 | -0.571283965 | -1.025365857 | 1.050364404  | 1.195997974  | 0.337533243  |
| 17287984 | 13 | Dapk1         | death associated protein kinase 1                              | 3.056968399  | 8.322219840  | 10.098575063  | 0.000203358 | -0.854033540 | -1.052563515 | -0.802496427 | 0.964478676  | 1.054895351  | 0.689719455  |
| 17318502 | 15 | Dgat1         | diacylglycerol O-acyltransferase 1                             | 2.187443447  | 4.554975983  | 7.686423689   | 0.000974335 | -1.139316702 | -0.820925251 | -0.748660666 | 0.954006427  | 0.783672288  | 0.971223905  |
| 17532755 | X  | Dgkk          | diacylglycerol kinase kappa                                    | -3.658318710 | 0.079202034  | -13.018660506 | 5.27E-05    | 0.991593743  | 0.821515016  | 0.916679958  | -0.893310130 | -0.825441150 | -1.011037438 |
| 17421312 | 4  | Dhrs3         | dehydrogenase/reductase (SDR family) member 3                  | 2.057784148  | 4.163463418  | 7.344940039   | 0.001220649 | -1.061999906 | -0.987334363 | -0.663060147 | 0.963469043  | 0.878688724  | 0.870236649  |
| 17269595 | 11 | Dhxs58        | DEXH (Asp-Glu-X-His) box polypeptide 58                        | 2.007820989  | 4.021743269  | 6.448175184   | 0.012752221 | -1.373688040 | -0.522198597 | -0.533922782 | 1.074128811  | 0.18665368   | 1.169026929  |
| 17251900 | 11 | Dlgl4         | dises, large homolog 4 (Drosophila)                            | 2.363589677  | 5.146493046  | 6.487198661   | 0.002525422 | -0.847189393 | -0.652227968 | -1.105541592 | 1.239808442  | 0.970415198  | 0.394735313  |
| 17308413 | 14 | Dmtn          | demaatin actin binding protein                                 | -2.147876471 | 0.225644502  | -7.162579537  | 0.001372392 | 0.621936535  | 0.866285182  | 1.1960009670 | -0.850996347 | -1.034379274 | -0.798855766 |
| 17303386 | 14 | Dnase1l3      | deoxyribonuclease 1-like 3                                     | -2.437434606 | 0.184611636  | -7.215983604  | 0.001329358 | 0.718318827  | 0.838419675  | 1.091142813  | -1.266868390 | -0.564165636 | -0.816847288 |
| 17383858 | 2  | Dnm1          | dynamain 1                                                     | 2.933376889  | 7.638963453  | 10.247113915  | 0.000182252 | -1.099460988 | -0.780209219 | -0.840907171 | 0.980433852  | 0.874192367  | 0.865951158  |
| 17435834 | 5  | Dpysl5        | dihydropyrimidinase-like 5                                     | -2.837843412 | 0.139869818  | -9.708045285  | 0.000245044 | 0.989925201  | 0.848253428  | 0.875757518  | -0.921788909 | -0.698624467 | -1.093522771 |
| 17243868 | 10 | Dram1         | DNA-damage regulated autophagy modulator 1                     | 3.456635460  | 10.978700999 | 11.806145452  | 8.87E-05    | -1.024396920 | -0.971900863 | -0.725324475 | 0.977373988  | 0.913736285  | 0.830511986  |
| 17348812 | 18 | Dsg2          | desmoglein 2                                                   | -2.025894686 | 0.245552823  | -5.818807745  | 0.004370191 | 0.773161205  | 0.605332223  | 1.212641240  | -1.322704775 | -0.709350683 | -0.559079210 |
| 17535600 | X  | Dusp9         | dual specificity phosphatase 9                                 | -2.16966571  | 0.222262165  | -6.370741437  | 0.002772102 | 1.347992601  | 0.797972122  | 0.475092394  | -0.942462265 | -0.947390440 | -0.731204413 |
| 17355298 | 18 | Dynap         | dynaactin associated protein                                   | -4.815723200 | 0.035507727  | -15.732089654 | 1.87E-05    | 0.932772688  | 0.937757452  | 0.854949917  | -1.077990562 | -0.809043684 | -0.838445811 |
| 17407850 | 3  | Ecm1          | extracellular matrix protein 1                                 | 2.12250005   | 4.353724158  | 6.7099929264  | 0.002066977 | -1.250032214 | -0.81422511  | -0.592151071 | 0.699081913  | 0.879832460  | 1.077494021  |
| 17543396 | X  | Eda2r         | ectodysplasin A2 receptor                                      | 2.812345249  | 7.024255143  | 8.088911758   | 0.000731926 | -0.942165070 | -0.932960375 | -0.784406855 | 1.112151896  | 1.083965009  | 0.463415395  |

|          |    |           |                                                                               |              |              |               |             |              |              |              |              |              |              |
|----------|----|-----------|-------------------------------------------------------------------------------|--------------|--------------|---------------|-------------|--------------|--------------|--------------|--------------|--------------|--------------|
| 17281084 | 12 | Egln3     | EGL nine homolog 3<br>(C. elegans)                                            | 4.894357268  | 29.740505575 | 13.239862826  | 4.90E-05    | -1.036190085 | -1.052535378 | -0.614879374 | 0.856356392  | 0.944755532  | 0.902492913  |
| 17491026 | 7  | Emp3      | epithelial membrane<br>protein 3                                              | 2.754374900  | 6.747602091  | 8.144078706   | 0.000705684 | -0.707540916 | -1.013597753 | -0.945211239 | 0.642629568  | 0.769077969  | 1.254642371  |
| 17425533 | 4  | Epb4.114b | erythrocyte protein<br>band 4.1-like 4b                                       | -2.037354104 | 0.243610107  | -6.667936263  | 0.002141179 | 0.655933547  | 0.838734820  | 1.173881686  | -1.165606558 | -0.761927519 | -0.741015977 |
| 17340272 | 17 | Epcam     | epithelial cell<br>adhesion molecule                                          | -4.952378438 | 0.032298737  | -17.129961854 | 1.20E-05    | 0.888956142  | 0.920052173  | 0.922391405  | -1.020627658 | -0.794543062 | -0.916228999 |
| 17466397 | 6  | Epha1     | Eph receptor A1                                                               | -2.297680706 | 0.203389808  | -7.097050937  | 0.001452177 | 0.624566350  | 1.070449822  | 0.962384757  | -0.649001693 | -0.780779958 | -1.227619279 |
| 17224661 | 1  | Epha4     | Eph receptor A4                                                               | -2.178861877 | 0.2220849906 | -7.813288032  | 0.000884288 | 0.855458351  | 1.046142101  | 0.815492749  | -1.029789621 | -0.954975508 | -0.732328072 |
| 17431588 | 4  | Ephb2     | Eph receptor B2                                                               | -2.315509527 | 0.200891785  | -7.960808627  | 0.000805618 | 0.828084428  | 0.924067026  | 0.951586475  | -1.172537058 | -0.827762672 | -0.703438199 |
| 17230484 | 1  | Ephx1     | epoxide hydrolase 1,<br>microsomal                                            | 3.685588138  | 12.866860168 | 11.343914730  | 0.000112080 | -1.126830681 | -0.748435286 | -0.830234731 | 0.751172464  | 1.035679245  | 0.918648988  |
| 17246231 | 10 | ErbB3     | v-erb-b2<br>erythroblastic<br>leukemia viral<br>oncogene homolog 3<br>(avian) | -2.626090084 | 0.161982506  | -9.164024379  | 0.000341990 | 0.690826240  | 0.953234444  | 1.071792075  | -0.844591055 | -0.960336296 | -0.910925407 |
| 17299196 | 14 | Ero11     | ERO1-like (S.<br>cerevisiae)                                                  | 2.210117976  | 4.627131103  | 4.323674435   | 0.017269963 | -1.604943408 | -0.610569497 | -0.127962397 | 1.056220038  | 0.856786429  | 0.430468835  |
| 17423291 | 4  | Esrp1     | epithelial splicing<br>regulatory protein 1                                   | -4.287257566 | 0.051216144  | -15.613509641 | 1.87E-05    | 0.895114307  | 0.948546549  | 0.890980899  | -0.959602483 | -0.820572919 | -0.954466353 |
| 17512634 | 8  | Esrp2     | epithelial splicing<br>regulatory protein 2                                   | -2.099683211 | 0.233309473  | -6.158078511  | 0.003286963 | 0.824589067  | 0.584296848  | 1.204061432  | -1.265737881 | -0.771857156 | -0.575352310 |
| 17239719 | 10 | Eya4      | eyes absent<br>4 homolog<br>(Drosophila)                                      | -2.092723230 | 0.234437745  | -7.098182804  | 0.001452177 | 0.715837370  | 0.795322428  | 1.178510054  | -0.709591044 | -1.023785922 | -0.956292887 |
| 17357444 | 19 | Fads3     | fatty acid desaturase<br>3                                                    | -3.357119532 | 0.097590226  | -12.204613587 | 7.22E-05    | 0.903877461  | 0.985933482  | 0.842035726  | -0.976514189 | -0.939877652 | -0.815454828 |
| 17357815 | 19 | Fam11a    | family with sequence<br>similarity 111,<br>member A                           | 4.480098234  | 22.317418222 | 14.941532175  | 2.22E-05    | -1.029232501 | -0.829419989 | -0.867180845 | 0.924399775  | 0.791987885  | 1.009445674  |
| 17372552 | 2  | Fam171b   | family with sequence<br>similarity 171,<br>member B                           | 2.820506909  | 7.064105597  | 7.593359601   | 0.001036782 | -1.252896957 | -0.463308938 | -0.918991382 | 1.014318831  | 0.929985713  | 0.690892732  |
| 17443901 | 5  | Fam20c    | family with sequence<br>similarity 20,<br>member C                            | 2.041794670  | 4.1117574264 | 5.353912724   | 0.006810633 | -1.307302927 | -0.861003377 | -0.364181053 | 0.890258783  | 1.192588619  | 0.449639955  |
| 17528924 | 9  | Fam83b    | family with sequence<br>similarity 83,<br>member B                            | -3.991397639 | 0.062873782  | -13.074888314 | 5.26E-05    | 0.821820830  | 0.924819391  | 0.973318736  | -1.076394258 | -0.901447896 | -0.742116803 |
| 17358797 | 19 | Fas       | Fas (TNF receptor<br>superfamily member<br>6)                                 | 2.231574674  | 4.696463101  | 4.947690093   | 0.009562990 | -1.545727819 | -0.697257327 | -0.206150117 | 0.680336587  | 0.718752710  | 1.050045966  |

|          |    |         |                                               |              |              |               |              |              |              |              |              |              |              |
|----------|----|---------|-----------------------------------------------|--------------|--------------|---------------|--------------|--------------|--------------|--------------|--------------|--------------|--------------|
| 17262964 | 11 | Fat2    | FAT tumor suppressor homolog 2 (Drosophila)   | 2.811022903  | 7.017819797  | 10.046494576  | 0.000207942  | -0.979382848 | -0.900011324 | -0.845397114 | 0.894299082  | 1.058373442  | 0.772118761  |
| 17490589 | 7  | Fcgrt   | Fc receptor, IgG, alpha chain transporter     | 3.130110630  | 8.755020944  | 11.458814280  | 0.000109232  | -0.840901471 | -0.965144591 | -0.926139890 | 0.943817576  | 0.977018968  | 0.811349407  |
| 17392056 | 2  | Fermt1  | fermitin family homolog 1 (Drosophila)        | -5.121796533 | 0.028720078  | -15.728728977 | 1.87E-05     | 1.023313235  | 0.808241691  | 0.889532328  | -1.069346407 | -0.807404537 | -0.844336310 |
| 17305662 | 14 | Fermt2  | fermitin family homolog 2 (Drosophila)        | 2.49906276   | 5.655310655  | 8.350913518   | 0.000594774  | -0.935891992 | -0.862349787 | -0.900551772 | 1.050093078  | 1.056366869  | 0.592333603  |
| 17324332 | 16 | Fetub   | fetuin beta                                   | 2.496470502  | 5.643031888  | 7.112402793   | 0.001439454  | -0.987440551 | -0.845571503 | -0.802139630 | 0.401152519  | 1.188562590  | 1.045436575  |
| 17541926 | X  | Fgf13   | fibroblast growth factor 13                   | -2.018387990 | 0.246833824  | -7.476139207  | 0.001125507  | 0.929134023  | 0.963407611  | 0.836034340  | -0.794234195 | -1.030239550 | -0.904102228 |
| 17447831 | 5  | Fgfbp1  | fibroblast growth factor binding protein 1    | -5.440047240 | 0.023034702  | -18.530795080 | 1.13E-05     | 0.878006481  | 0.942407861  | 0.911103429  | -0.833119773 | -0.863127667 | -1.035270332 |
| 17539536 | X  | Figf    | c-fos induced growth factor                   | 2.710367892  | 6.544885223  | 7.181737508   | 0.001356945  | -1.124706854 | -1.075284994 | -0.420335598 | 0.612070997  | 1.078076763  | 0.930179686  |
| 17256365 | 11 | Fkbp10  | FK506 binding protein 10                      | 4.051749189  | 16.584334195 | 14.995026157  | 2.22E-05     | -0.919750058 | -0.915277380 | -0.900988470 | 0.844378685  | 0.980645831  | 0.910991392  |
| 17386770 | 2  | Fkbp7   | FK506 binding protein 7                       | 2.826225374  | 7.092161425  | 9.493647479   | 0.000271849  | -1.050737158 | -0.637417725 | -1.020661151 | 0.910156650  | 0.930377790  | 0.868281594  |
| 17455346 | 5  | Fil1    | FMS-like tyrosine kinase 1                    | 2.967701592  | 7.822889529  | 10.509741783  | 0.000163914  | -0.966681846 | -1.008609215 | -0.748844510 | 0.889414035  | 0.998928779  | 0.835792757  |
| 17321524 | 15 | Fmnl3   | formin-like 3                                 | 2.594369404  | 6.039250034  | 8.568010069   | 0.000522982  | -0.875309706 | -1.117276709 | -0.705203531 | 1.094066602  | 0.750540901  | 0.853182443  |
| 17229020 | 1  | Fmo1    | flavin containing monooxygenase 1             | 4.521384141  | 22.965306621 | 13.902608409  | 3.71E-05     | -0.761254522 | -1.030348823 | -0.924745578 | 0.735062170  | 1.008719346  | 0.972567407  |
| 17544025 | X  | Fndc3e1 | fibronectin type III domain containing 3C1    | -2.030457305 | 0.244777473  | -7.167783911  | 0.001368679  | 1.050605813  | 0.969546616  | 0.686287738  | -0.777943682 | -1.065416936 | -0.863079549 |
| 17266424 | 11 | Foxn1   | forkhead box N1                               | -3.425049304 | 0.093101660  | -12.271868927 | 7.12E-05     | 0.822738882  | 0.861453044  | 1.045511483  | -0.857520248 | -0.932267088 | -0.939916073 |
| 17309981 | 15 | Fyb     | FYN binding protein                           | 3.567296042  | 11.853950573 | 10.316043661  | 0.000177746  | -1.232370045 | -0.768013871 | -0.689502719 | 0.882781319  | 0.859466970  | 0.947638347  |
| 17311179 | 15 | Fzd6    | frizzled homolog 6 (Drosophila)               | -2.263508746 | 0.208264847  | -6.641635849  | 0.002184549  | 0.972461284  | 0.716657984  | 0.940564709  | -1.314024947 | -0.836599633 | -0.479059397 |
| 17261608 | 11 | Gabrp   | gamma-aminobutyric acid (GABA) A receptor, pi | -2.593826964 | 0.165645743  | -5.538839083  | 0.0005719168 | 0.351693205  | 0.573797282  | 1.566937343  | -0.756045331 | -0.947750340 | -0.788632159 |
| 17251222 | 11 | Gas7    | growth arrest specific 7                      | 2.078180569  | 4.222743361  | 6.462721713   | 0.002544156  | -0.905325785 | -1.017271357 | -0.721450004 | 0.965389128  | 0.462412864  | 1.216245155  |
| 17371201 | 2  | Gca     | granulocin                                    | -2.438435138 | 0.184483649  | -8.377392601  | 0.000589060  | 0.738655797  | 0.983824895  | 0.984372967  | -1.123258820 | -0.761061704 | -0.822533136 |

|          |    |         |                                                                              |              |              |               |             |              |              |              |              |               |              |
|----------|----|---------|------------------------------------------------------------------------------|--------------|--------------|---------------|-------------|--------------|--------------|--------------|--------------|---------------|--------------|
| 17528562 | 9  | Gent3   | glucosaminyl<br>(N-acetyl) transferase<br>3, mucin type                      | -3.490397551 | 0.088978615  | -12.332820903 | 7.00E-05    | 0.795685740  | 1.034723670  | 0.897339411  | -0.88505567  | -0.991811268  | -0.850881884 |
| 17363470 | 19 | Gda     | guanine deaminase                                                            | 2.829519576  | 7.108373934  | 9.562654810   | 0.000264744 | -1.065146489 | -0.954872732 | -0.690518408 | 1.016208427  | 0.780794199   | 0.913535003  |
| 17510114 | 8  | Gdf15   | growth differentiation<br>factor 15                                          | 3.041945494  | 8.236009500  | 5.857162814   | 0.004275341 | -0.891759005 | -0.671115284 | -0.935546597 | 1.450611110  | 0.859983345   | 0.187826431  |
| 17536600 | X  | Gdpd2   | glycerophosphodiester<br>phosphodiesterase<br>domain containing 2            | 2.333258435  | 5.039422569  | 7.774760632   | 0.000906140 | -1.115769454 | -0.757666863 | -0.818573984 | 1.127145971  | 0.692772093   | 0.872092237  |
| 17483098 | 7  | Gdpd3   | glycerophosphodiester<br>phosphodiesterase<br>domain containing 3            | -2.957974901 | 0.128694749  | -10.331693055 | 0.000177746 | 0.940864603  | 0.765509631  | 1.014468353  | -1.052461182 | -0.824191462  | -0.844189943 |
| 17301823 | 14 | Gfra2   | glial cell line derived<br>neurotrophic factor<br>family receptor<br>alpha 2 | -3.624117673 | 0.081102058  | -13.709139000 | 3.92E-05    | 0.898836281  | 0.906580813  | 0.932983183  | -0.907361064 | -0.922248376  | -0.908790837 |
| 17393264 | 2  | Ggt7    | gamma-<br>glutamyltransferase 7                                              | 2.527029941  | 5.763838613  | 9.514022404   | 0.000271849 | -0.941596236 | -0.897795325 | -0.897458286 | 0.968055369  | 0.868896346   | 0.899898132  |
| 17307117 | 14 | Gjfb2   | gap junction protein,<br>beta 2                                              | -3.070809195 | 0.119012978  | -7.861906191  | 0.000854367 | 0.937294266  | 0.713952907  | 0.981623938  | -1.340093266 | -0.555071043  | -0.737706802 |
| 17413500 | 4  | Glipr2  | GLI pathogenesis-<br>related 2                                               | 3.342261512  | 10.141938400 | 12.2433383885 | 7.12E-05    | -1.012124178 | -0.854314161 | -0.866644765 | 0.895159284  | 0.872128754   | 0.965795065  |
| 17406165 | 3  | Glrb    | glycine receptor, beta<br>subunit                                            | 2.268109732  | 4.816915887  | 6.274984343   | 0.003024898 | -1.334235284 | -0.440342038 | -0.824226284 | 0.614217102  | 0.994710233   | 0.989876271  |
| 17439054 | 5  | Gm1045  | predicted gene 1045                                                          | -2.055373785 | 0.240586270  | -6.153018308  | 0.003300148 | 0.685681618  | 0.734933642  | 1.199514659  | -1.22186852  | -0.498696555  | -0.899564844 |
| 17268088 | 11 | Gm11543 | predicted gene 11543                                                         | -2.998173697 | 0.125158337  | -7.344262202  | 0.001220649 | 0.902815814  | 0.856359854  | 0.851316871  | -0.419822070 | -0.820506315  | -1.370164154 |
| 17416009 | 4  | Gm12794 | predicted gene 12794                                                         | -2.026782906 | 0.245401691  | -6.472208872  | 0.002528262 | 0.896157075  | 1.000769066  | 0.757503566  | -0.474137238 | -0.990375560  | -1.189916909 |
| 17401293 | 3  | Gm15472 | predicted gene 15472                                                         | -3.823893119 | 0.070614432  | -9.701732448  | 0.000245044 | 0.858441200  | 0.658031455  | 1.150281518  | -0.588429628 | -1.017254991  | -1.061069554 |
| 17548692 | 8  | Gm19958 | predicted gene, 19958                                                        | -4.708647857 | 0.038243335  | -15.596404610 | 1.87E-05    | 0.771287867  | 0.942094846  | 1.012947770  | -0.840652939 | -1.001668530  | -0.884009013 |
| 17548644 | 4  | Gm3579  | predicted gene 3579                                                          | -5.451424008 | 0.022853770  | -17.736928433 | 1.13E-05    | 0.893807027  | 0.912854431  | 0.921363581  | -0.956896891 | -1.017465216  | -0.753662931 |
| 17279934 | 12 | Gm4755  | predicted gene 4755                                                          | -2.423311033 | 0.186427807  | -5.968102381  | 0.003882258 | 0.973492190  | 0.256105211  | 1.322941438  | -0.928294379 | -0.645188797  | -0.979055663 |
| 17525482 | 9  | Gm5615  | predicted gene 5615                                                          | -2.486471645 | 0.178442152  | -6.663556702  | 0.002146345 | 0.349855643  | 1.193012162  | 1.062519827  | -0.979789920 | -0.664302433  | -0.961295281 |
| 17219039 | 1  | Gpa33   | glycoprotein A33<br>(transmembrane)                                          | -2.982037553 | 0.126566056  | -9.806147012  | 0.000235185 | 0.650612142  | 0.945227060  | 1.110611787  | -0.973247911 | -0.8495252913 | -0.883677165 |
| 17458439 | 6  | Gpnmb   | glycoprotein<br>(transmembrane)<br>nmb                                       | 2.103451123  | 4.297361439  | 6.070280308   | 0.003545868 | -1.106122280 | -1.022827941 | -0.474900675 | 0.891436830  | 0.506961228   | 1.205452838  |
| 17405471 | 3  | Gpr87   | G protein-coupled<br>receptor 87                                             | -2.000942428 | 0.249836743  | -7.213538206  | 0.001329358 | 0.812553408  | 1.085414201  | 0.817737910  | -0.817509374 | -1.056433538  | -0.841762607 |
| 17311104 | 15 | Grih2   | grainyhead-like 2<br>(Drosophila)                                            | -2.809979615 | 0.142597479  | -8.893102012  | 0.000406950 | 0.678706058  | 0.883744443  | 1.128657291  | -1.113077027 | -0.773923201  | -0.804107564 |
| 17312280 | 15 | Gsdmd   | gasdermin D                                                                  | 2.282244986  | 4.864343085  | 6.146520924   | 0.003319335 | -1.266285181 | -0.740012002 | -0.579088223 | 0.439448280  | 0.978303258   | 1.167633869  |

|          |    |        |                                                          |              |              |               |             |              |               |              |              |              |              |
|----------|----|--------|----------------------------------------------------------|--------------|--------------|---------------|-------------|--------------|---------------|--------------|--------------|--------------|--------------|
| 17211405 | 1  | Gsta3  | glutathione S-transferase, alpha 3                       | 2.265432109  | 4.807984045  | 5.906699065   | 0.004106237 | -0.905378875 | -0.937552564  | -0.721306806 | 0.228772928  | 1.194793641  | 1.140671678  |
| 17457876 | 6  | Gstk1  | glutathione S-transferase kappa 1                        | 2.248516363  | 4.751939154  | 7.019932785   | 0.001560286 | -0.724704578 | -1.189274757  | -0.745111334 | 0.694362857  | 0.766701596  | 1.198026216  |
| 17409142 | 3  | Gstm2  | glutathione S-transferase, mu 2                          | 3.76769339   | 13.620364337 | 13.561607514  | 4.22E-05    | -0.966385439 | -0.861973164  | -0.903519879 | 0.800368727  | 0.985732474  | 0.945777282  |
| 17325069 | 16 | Heg1   | HEG homolog 1 (zebrafish)                                | 3.470560170  | 11.085179063 | 11.236495730  | 0.000117069 | -1.026707385 | -1.026780226  | -0.658260365 | 0.838379005  | 0.918620711  | 0.954748259  |
| 17276328 | 12 | Hif1a  | hypoxia inducible factor 1, alpha subunit                | 2.065080481  | 4.184573190  | 6.916723867   | 0.001717038 | -1.057735718 | -0.833365326  | -0.791027780 | 1.176912946  | 0.899255365  | 0.605960512  |
| 17519550 | 9  | Hmgcl1 | 3-hydroxymethyl-3-methylglutaryl-Coenzyme A lyase-like 1 | 2.441819963  | 5.433267067  | 8.507736263   | 0.000542557 | -0.784226097 | -1.155383033  | -0.772197544 | 0.880816973  | 0.944565862  | 0.886423839  |
| 17415570 | 4  | Hook1  | hook homolog 1 (Drosophila)                              | -2.971397806 | 0.127502920  | -9.044379885  | 0.000367007 | 0.997712930  | 0.853552103   | 0.833650210  | -0.969798849 | -0.566248124 | -1.148868270 |
| 17450142 | 5  | Hpsc   | heparanase                                               | 2.283341005  | 4.868039940  | 7.436278783   | 0.001153401 | -1.194847547 | -0.9235888354 | -0.561836128 | 0.822040834  | 0.902645431  | 0.955585764  |
| 17340845 | 17 | Igf2r  | insulin-like growth factor 2 receptor                    | -3.011950221 | 0.123968869  | -9.888212717  | 0.000222185 | 0.838466953  | 0.770961620   | 1.097232620  | -1.026829944 | -0.710734198 | -0.969097051 |
| 17260474 | 11 | Igfbp3 | insulin-like growth factor binding protein 3             | -2.460441295 | 0.181690980  | -5.723738587  | 0.004810872 | 1.252061967  | 0.348840091   | 0.923146299  | -1.081499028 | -1.073650815 | -0.368898515 |
| 17256264 | 11 | Igfbp4 | insulin-like growth factor binding protein 4             | 3.489830783  | 11.234241239 | 12.039064535  | 7.90E-05    | -1.003501183 | -0.793311532  | -0.926872852 | 0.930536327  | 0.772158081  | 1.020991159  |
| 17315305 | 15 | Igfbp6 | insulin-like growth factor binding protein 6             | 3.805866843  | 13.985567033 | 12.714052738  | 6.01E-05    | -0.810813520 | -0.895089634  | -1.015307025 | 0.747106497  | 0.943252074  | 1.030851607  |
| 17219554 | 1  | Igsf9  | immunoglobulin superfamily, member 9                     | -2.165082861 | 0.222969323  | -6.562907667  | 0.002359580 | 0.965863221  | 0.553271466   | 1.118691614  | -1.189345999 | -0.572687355 | -0.875792946 |
| 17461684 | 6  | III7re | interleukin 17 receptor E                                | -3.020160476 | 0.123265376  | -10.593138861 | 0.000156631 | 0.799627732  | 0.827723375   | 1.095147745  | -0.943533963 | -0.847610344 | -0.931354545 |
| 17212229 | 1  | III8r1 | interleukin 18 receptor 1                                | -4.293371395 | 0.050999560  | -15.190254713 | 2.08E-05    | 0.794039980  | 1.006239926   | 0.931284652  | -0.941542295 | -0.871571032 | -0.918451231 |
| 17391554 | 2  | III1a  | interleukin 1 alpha                                      | -6.159738035 | 0.013987306  | -17.069424309 | 1.20E-05    | 0.805559606  | 0.957749676   | 0.955158290  | -1.094304897 | -0.862113911 | -0.762048764 |
| 17367659 | 2  | III1f6 | interleukin 1 family, member 6                           | 2.718215677  | 6.580584245  | 7.482611193   | 0.001125507 | -1.014598742 | -0.878115722  | -0.744239288 | 0.440623919  | 0.957579977  | 1.238749856  |
| 17367652 | 2  | III19  | interleukin 1 family, member 9                           | 4.120059679  | 17.388477083 | 9.958573651   | 0.000215399 | -1.222815051 | -0.758497998  | -0.684035204 | 0.757113654  | 1.137964040  | 0.770270560  |
| 17246091 | 10 | II23a  | interleukin 23, alpha subunit p19                        | -2.441209333 | 0.184129242  | -7.528025134  | 0.001087581 | 0.795526577  | 0.940664806   | 0.929434420  | -1.286121812 | -0.609708560 | -0.76979543  |

|          |    |       |                                                                         |              |              |               |             |              |              |              |              |              |              |
|----------|----|-------|-------------------------------------------------------------------------|--------------|--------------|---------------|-------------|--------------|--------------|--------------|--------------|--------------|--------------|
| 17226708 | 1  | Il24  | interleukin 24                                                          | -3.338513721 | 0.098856955  | -8.774961372  | 0.000450487 | 1.014017726  | 1.146181897  | 0.496283963  | -1.069543171 | -0.727801334 | -0.859139081 |
| 17358598 | 19 | Il33  | interleukin 33                                                          | 3.134995776  | 8.784716790  | 8.814485482   | 0.000436145 | -1.223337224 | -0.631392393 | -0.812938175 | 0.787995060  | 0.771907511  | 1.107765222  |
| 17435725 | 5  | Il6   | interleukin 6                                                           | 2.267154645  | 4.813728067  | 7.198473776   | 0.001339277 | -1.173570666 | -0.974295151 | -0.520248988 | 0.873441775  | 0.775895856  | 1.018777173  |
| 17245399 | 10 | Irak3 | interleukin-1<br>receptor-associated<br>kinase 3                        | 3.088275494  | 8.504789294  | 9.502022851   | 0.000271849 | -1.079945311 | -0.891019232 | -0.720750730 | 0.634224106  | 1.001856256  | 1.055634911  |
| 17527661 | 9  | Isir  | immunoglobulin<br>superfamily<br>containing leucine-<br>rich repeat     | 2.373683814  | 5.182627893  | 6.907989300   | 0.001729244 | -0.752795683 | -0.664407123 | -1.217939076 | 0.604205788  | 1.216802219  | 0.814133875  |
| 17238605 | 10 | Itga7 | integrin alpha 7                                                        | 2.95878772   | 7.774703840  | 7.923694629   | 0.000824838 | -0.925779232 | -1.009314022 | -0.707142319 | 0.9632249160 | 1.218189079  | 0.460797333  |
| 17257235 | 11 | Itgb3 | integrin beta 3                                                         | 2.641672337  | 6.240546335  | 8.084502126   | 0.000731926 | -1.065815585 | -0.997717861 | -0.609641701 | 1.077119469  | 0.975580633  | 0.620475045  |
| 17258473 | 11 | Itgb4 | integrin beta 4                                                         | -2.964494360 | 0.128114497  | -9.785267936  | 0.000237796 | 0.838116879  | 0.728029950  | 1.140902680  | -0.782511949 | -0.933753843 | -0.990783718 |
| 17385654 | 2  | Itgb6 | integrin beta 6                                                         | -2.724538226 | 0.151297680  | -9.759828346  | 0.000240068 | 1.006595926  | 0.735157891  | 0.982761448  | -0.861147713 | -0.893982619 | -0.969384933 |
| 17322163 | 15 | Itgb7 | integrin beta 7                                                         | 4.293870508  | 19.614797120 | 13.933834126  | 3.71E-05    | -0.906429016 | -0.862385174 | -0.952453304 | 0.758913029  | 0.866843412  | 1.095511053  |
| 17303722 | 14 | Knk5  | potassium channel,<br>subfamily K, member<br>5                          | 2.328224488  | 5.021869324  | 8.574587898   | 0.000522982 | -0.830112958 | -0.969109428 | -0.929880627 | 1.017454320  | 0.914889957  | 0.796758736  |
| 17511927 | 8  | Kifc3 | kinesin family<br>member C3                                             | -2.004581783 | 0.249207297  | -6.076017733  | 0.003540398 | 0.650198030  | 0.815944737  | 1.155918042  | -0.622037714 | -0.693129582 | -1.306893513 |
| 17471828 | 6  | Klra2 | killer cell lectin-like<br>receptor, subfamily<br>A, member 2           | 2.877387445  | 7.348182436  | 7.463586467   | 0.001128754 | -1.092209890 | -0.505976627 | -1.026261255 | 1.010634914  | 1.102096324  | 0.511716534  |
| 17269391 | 11 | Krt14 | keratin 14                                                              | -3.269364313 | 0.103710631  | -7.658203082  | 0.000989648 | 0.849075281  | 0.765450589  | 0.998806405  | -1.399610987 | -0.612849549 | -0.600871738 |
| 17315245 | 15 | Krt18 | keratin 18                                                              | -2.394967206 | 0.190126666  | -6.379209267  | 0.002756150 | 0.884784475  | 0.716007052  | 0.991779267  | -0.827174478 | -0.393650855 | -1.371745461 |
| 17315200 | 15 | Krt7  | keratin 7                                                               | -4.598959457 | 0.041264373  | -11.777880176 | 8.94E-05    | 0.917003665  | 0.903062714  | 0.869906913  | -1.123352657 | -0.562207768 | -1.004412868 |
| 17321823 | 15 | Krt80 | keratin 80                                                              | -3.214607989 | 0.107722537  | -9.120071008  | 0.000349986 | 1.175656517  | 0.695361432  | 0.802583398  | -1.158449449 | -0.744998978 | -0.770152920 |
| 17217639 | 1  | Lad1  | ladinin                                                                 | -3.190940075 | 0.109504338  | -10.316737754 | 0.000177746 | 0.882233628  | 0.935729172  | 0.888632116  | -1.074482839 | -0.628973947 | -1.003138129 |
| 17348492 | 18 | Lama3 | laminin, alpha 3                                                        | -3.804761455 | 0.071557091  | -14.026233886 | 3.60E-05    | 0.891041246  | 0.921218641  | 0.922907004  | -0.919626069 | -0.984705546 | -0.830835276 |
| 17232593 | 10 | Lama4 | laminin, alpha 4                                                        | 3.936294388  | 15.308854051 | 13.854016904  | 3.74E-05    | -0.981767105 | -0.946531209 | -0.801248161 | 0.901169941  | 0.999703681  | 0.828672852  |
| 17228136 | 1  | Lame2 | laminin, gamma 2                                                        | -2.954123534 | 0.129038767  | -9.37321407   | 0.000298250 | 0.803614898  | 1.00028569   | 0.792591026  | -0.884586212 | -0.690868106 | -1.120780176 |
| 17526956 | 9  | Layn  | layilin                                                                 | 4.593430808  | 24.141289056 | 16.376179639  | 1.52E-05    | -0.887552365 | -1.010786271 | -0.834839770 | 0.903655436  | 0.956199246  | 0.8733323724 |
| 17378827 | 2  | Lbp   | lipopolysaccharide<br>binding protein                                   | 5.560284024  | 47.185903562 | 19.681094035  | 1.13E-05    | -1.001541768 | -0.901837278 | -0.831052980 | 0.927470550  | 0.893529604  | 0.913431872  |
| 17383892 | 2  | Len2  | lipocalin 2                                                             | 2.408456143  | 5.309058883  | 5.507972200   | 0.005902005 | -1.477019141 | -0.826346724 | -0.201556176 | 0.791623696  | 0.839664282  | 0.873634062  |
| 17310044 | 15 | Lifr  | leukemia inhibitory<br>factor receptor                                  | 4.337710347  | 20.219989554 | 12.258576862  | 7.12E-05    | -0.828344011 | -0.930569022 | -0.942783637 | 1.074727526  | 1.014099822  | 0.612869322  |
| 17233226 | 10 | Llrb4 | leukoocyte<br>immunoglobulin-like<br>receptor, subfamily<br>B, member 4 | 2.433816825  | 5.403210263  | 7.517830390   | 0.001092913 | -0.722319673 | -1.067019074 | -0.876560527 | 0.727341492  | 0.683501489  | 1.255056293  |

|          |    |              |                                                   |              |              |               |             |              |              |              |              |              |              |
|----------|----|--------------|---------------------------------------------------|--------------|--------------|---------------|-------------|--------------|--------------|--------------|--------------|--------------|--------------|
| 17364114 | 19 | Lipa         | lysosomal acid lipase A                           | 2.241563768  | 4.729093835  | 6.551957564   | 0.002384151 | -1.350175891 | -0.781839573 | -0.493640600 | 0.902564680  | 0.754480427  | 0.968610958  |
| 17355443 | 18 | Lipg         | lipase, endothelial                               | -2.279846543 | 0.205919657  | -6.242507911  | 0.003110267 | 0.427012173  | 1.109254749  | 1.058141583  | -0.707147041 | -0.638167112 | -1.249094351 |
| 17358749 | 19 | Lipn         | lipase, family member N                           | 4.325658215  | 20.051777353 | 11.375664844  | 0.000110941 | -0.908034522 | -1.112836859 | -0.668021074 | 0.719805919  | 0.854075224  | 1.115011313  |
| 17400622 | 3  | Lix1l        | Lix1-like                                         | 2.228101633  | 4.685170769  | 6.533390118   | 0.002405423 | -1.213256914 | -0.447169606 | -0.965628465 | 0.760130881  | 1.129142245  | 0.736781858  |
| 17461477 | 6  | Lmcd1        | LIM and cysteine-rich domains 1                   | 3.357530835  | 10.249849596 | 8.412894197   | 0.000578366 | -0.938623708 | -0.864264446 | -0.839582890 | 1.206682999  | 1.018148545  | 0.417639501  |
| 17299105 | 14 | LOC100505112 | disks large homolog 5-like                        | -2.249165722 | 0.210345707  | -8.021784070  | 0.000764834 | 0.9222636805 | 0.955802616  | 0.837873806  | -0.684672429 | -0.998620543 | -1.033020255 |
| 17455704 | 5  | LOC625240    | PRAME family member 12-like                       | -2.956184767 | 0.128854536  | -9.502703844  | 0.000271849 | 0.611280662  | 1.105092735  | 0.983485191  | -0.873359117 | -0.972649127 | -0.853850343 |
| 17354367 | 18 | Lox          | lysyl oxidase                                     | 5.245583005  | 37.938296753 | 17.367724602  | 1.20E-05    | -0.877599064 | -0.981180290 | -0.869889421 | 0.773613460  | 0.957539023  | 0.997516292  |
| 17480485 | 7  | Lrrc32       | leucine rich repeat containing 32                 | 3.899883653  | 14.927323994 | 12.823082504  | 5.68E-05    | -0.966226292 | -0.878278628 | -0.875149571 | 1.064657486  | 0.941830316  | 0.713166690  |
| 17439901 | 5  | Lrrc8b       | leucine rich repeat containing 8 family, member B | -2.101385699 | 0.233034312  | -7.362051965  | 0.001217620 | 1.018107457  | 0.755644629  | 0.931361084  | -1.140804256 | -0.787603952 | -0.776704962 |
| 17318083 | 15 | Ly6a         | lymphocyte antigen 6 complex, locus A             | 2.928687292  | 7.614172697  | 5.960794944   | 0.003906531 | -1.540986800 | -0.444308725 | -0.528759497 | 0.695475682  | 0.834922232  | 0.983657008  |
| 17318100 | 15 | Ly6c2        | lymphocyte antigen 6 complex, locus C2            | 3.435407059  | 10.818338643 | 9.128296094   | 0.000349986 | -1.189165789 | -0.889323272 | -0.585461556 | 0.790138752  | 0.746749533  | 1.127062332  |
| 17312229 | 15 | Ly6f         | lymphocyte antigen 6 complex, locus F             | 2.027171110  | 4.076048196  | 4.153201511   | 0.020477239 | -0.369176854 | -1.232875192 | -0.727230153 | -0.041172396 | 1.227893783  | 1.142560811  |
| 17318013 | 15 | Lynx1        | Ly6/neurotoxin 1                                  | 2.501194237  | 5.661538829  | 6.813198474   | 0.001890217 | -1.221026093 | -0.810639549 | -0.583070785 | 0.760230500  | 0.599807751  | 1.254698175  |
| 17279724 | 12 | Macc1        | metastasis associated in colon cancer 1           | -5.862009627 | 0.017193301  | -18.113332930 | 1.13E-05    | 0.917288557  | 0.859445302  | 0.948945791  | -1.077127201 | -0.810642357 | -0.837910093 |
| 17311512 | 15 | Mal2         | mal, T cell differentiation protein 2             | -3.854297350 | 0.069141832  | -9.037782766  | 0.000367191 | 0.851771738  | 0.826252357  | 0.968997792  | -0.888922343 | -0.480806573 | -1.277292971 |
| 17431332 | 4  | Man1c1       | mannosidase, alpha, class 1C, member 1            | 2.056503125  | 4.159768163  | 6.358559046   | 0.002792513 | -0.940996405 | -1.261810937 | -0.436097767 | 0.815485422  | 0.863070803  | 0.960348884  |
| 17257906 | 11 | Map2k6       | mitogen-activated protein kinase kinase 6         | 2.511480806  | 5.702050459  | 8.478476396   | 0.000550161 | -1.173075985 | -0.690902926 | -0.838769163 | 0.892506866  | 0.842045041  | 0.968196166  |
| 17231925 | 10 | Map7         | microtubule-associated protein 7                  | -2.446995581 | 0.183392230  | -8.436809460  | 0.000569089 | 0.760246415  | 0.969383257  | 0.978681338  | -0.972069807 | -0.677965584 | -1.058275619 |
| 17295685 | 13 | Marvel2      | MARVEL (membrane-associating) domain containing 2 | -2.970733635 | 0.127561632  | -10.66329305  | 0.000152970 | 1.035713309  | 0.759124892  | 0.932351493  | -0.904562605 | -0.875748282 | -0.946878807 |

|          |    |          |                                                        |              |              |               |             |              |              |              |              |              |              |
|----------|----|----------|--------------------------------------------------------|--------------|--------------|---------------|-------------|--------------|--------------|--------------|--------------|--------------|--------------|
| 17512860 | 8  | Marveld3 | MARVEL (membrane-associating) domain containing 3      | -2.266390950 | 0.207849193  | -7.944514760  | 0.000814130 | 0.797319907  | 0.900330915  | 1.012304770  | -1.045320051 | -0.673062459 | -0.991573083 |
| 17329403 | 16 | Masp1    | mannan-binding lectin serine peptidase 1               | 2.025030990  | 4.070006194  | 7.228146380   | 0.001320777 | -0.952444175 | -0.979219125 | -0.779896225 | 1.021272729  | 0.680508863  | 1.009773370  |
| 17444970 | 5  | Medag    | mesenteric estrogen dependent adipogenesis             | 2.474214092  | 5.556645073  | 8.081825555   | 0.000731926 | -1.153689234 | -0.589723286 | -0.946378747 | 0.867764939  | 0.831361088  | 0.990665240  |
| 17315002 | 15 | Mett7a1  | methyltransferase like 7A1                             | 2.086623709  | 4.247528739  | 6.687725023   | 0.002103516 | -1.275820266 | -0.562860298 | -0.822223168 | 0.792637655  | 0.988614588  | 0.879651489  |
| 17222332 | 1  | Mgat4a   | mannoside acetylglucosaminyltransferase 4, isoenzyme A | -2.630818890 | 0.161452436  | -8.579131112  | 0.000522982 | 0.857955678  | 0.87562294   | 0.96117209   | -1.001595970 | -0.585078071 | -1.108076667 |
| 17397475 | 3  | Mgst2    | microsomal glutathione S-transferase 2                 | 3.355481994  | 10.235303621 | 10.978593026  | 0.000130106 | -1.136509398 | -0.718730594 | -0.856843147 | 0.847597026  | 0.954799545  | 0.909686568  |
| 17291026 | 13 | Mir1983  | microRNA 1983                                          | -2.270138104 | 0.207310041  | -5.423914211  | 0.006325166 | 1.229188269  | 1.095745657  | 0.184674763  | -1.124322236 | -0.816584984 | -0.568701469 |
| 17255064 | 11 | Mmd      | monocyte to macrophage differentiation-associated      | 2.250807089  | 4.759490323  | 7.538204620   | 0.001087581 | -0.982654297 | -0.644985550 | -1.063160436 | 0.723340555  | 0.862478862  | 1.104980866  |
| 17514482 | 9  | Mmp13    | matrix metalloproteinase 13                            | 2.826763463  | 7.094807117  | 7.452502848   | 0.001138370 | -1.185078715 | -0.757589852 | -0.684599115 | 0.467071708  | 1.051895097  | 1.108300876  |
| 17503825 | 8  | Mmp2     | matrix metalloproteinase 2                             | 5.057650233  | 33.304615773 | 17.223402079  | 1.20E-05    | -0.942979425 | -0.895830926 | -0.891575187 | 1.012718766  | 0.938147872  | 0.779518899  |
| 17514515 | 9  | Mmp3     | matrix metalloproteinase 3                             | 2.406931513  | 5.303451271  | 5.768568670   | 0.004606168 | -1.113295903 | -0.580225320 | -0.840477207 | 0.394982296  | 0.699506140  | 1.439509994  |
| 17232215 | 10 | Moxd1    | monooxygenase, DBH-like 1                              | -3.463955998 | 0.090624441  | -11.115257805 | 0.000126154 | 0.780720832  | 1.101460698  | 0.827689379  | -0.898940661 | -0.756533746 | -1.054396502 |
| 17516699 | 9  | Mpzl2    | myelin protein zero-like 2                             | -5.505301398 | 0.022016037  | -15.204965022 | 2.08E-05    | 0.931905857  | 1.004001736  | 0.777197660  | -1.010345796 | -0.694851340 | -1.007908117 |
| 17516707 | 9  | Mpzl3    | myelin protein zero-like 3                             | -3.597685570 | 0.082601651  | -11.963270394 | 8.12E-05    | 0.859498568  | 0.933906293  | 0.924953666  | -1.122400972 | -0.808413421 | -0.787544134 |
| 17228353 | 1  | Mrl      | major histocompatibility complex, class I-related      | 5.078085439  | 33.779719395 | 13.011983343  | 5.27E-05    | -1.129309323 | -0.642109725 | -0.927187117 | 0.974942428  | 0.953096671  | 0.770567066  |
| 17224125 | 1  | Mreg     | melanoregulin                                          | 2.008454856  | 4.023510661  | 6.320590952   | 0.002881796 | -0.807375191 | -0.846789825 | -0.990462885 | 1.326920254  | 0.555942496  | 0.761765152  |
| 17357700 | 19 | Ms4a4d   | membrane-spanning 4-domains, subfamily A, member 4D    | 3.965525715  | 15.622199832 | 11.893425157  | 8.43E-05    | -0.939239090 | -0.741616174 | -1.024681711 | 0.717829100  | 1.110243069  | 0.877464806  |

|          |    |         |                                                                                               |              |              |               |             |              |              |              |              |              |              |
|----------|----|---------|-----------------------------------------------------------------------------------------------|--------------|--------------|---------------|-------------|--------------|--------------|--------------|--------------|--------------|--------------|
| 17342340 | 17 | Msln    | mesothelin                                                                                    | -3.223940989 | 0.107027913  | -10.387923330 | 0.000172657 | 0.707659874  | 1.146392313  | 0.852406856  | -1.000460574 | -0.819324506 | -0.886673962 |
| 17374156 | 2  | Muc15   | mucin 15                                                                                      | -2.528056059 | 0.173372134  | -5.128065236  | 0.008248509 | 0.079117777  | 0.959832293  | 1.407763827  | -0.913353044 | -0.967742380 | -0.565618473 |
| 17351760 | 18 | Myo5b   | myosin VB                                                                                     | -2.286777241 | 0.204932792  | -7.889103888  | 0.000841782 | 0.715906906  | 0.843258897  | 1.145068772  | -1.029754196 | -0.799337237 | -0.875143142 |
| 17316402 | 15 | Nipal2  | NIPA-like domain containing 2                                                                 | -4.934181799 | 0.032708699  | -17.667346512 | 1.13E-05    | 0.936752110  | 0.814200065  | 0.983302958  | -0.906359990 | -0.896623078 | -0.931272064 |
| 17526695 | 9  | Nnmt    | nicotinamide N-methyltransferase                                                              | 2.501643572  | 5.663302423  | 8.374942488   | 0.000589060 | -1.116337144 | -0.612547569 | -0.97069104  | 0.968117639  | 0.873158753  | 0.858299361  |
| 17253707 | 11 | Nos2    | nitric oxide synthase 2, inducible                                                            | 2.747677371  | 6.716349800  | 5.581925875   | 0.005481326 | -1.489625212 | -0.831271895 | -0.165531066 | 0.808936632  | 0.863603557  | 0.813887984  |
| 17410435 | 3  | Npnt    | nephroectin                                                                                   | -3.625855402 | 0.081004429  | -12.853211853 | 5.66E-05    | 0.929685841  | 0.899519899  | 0.899834430  | -0.947423610 | -0.764009418 | -1.017607144 |
| 17316043 | 15 | Npr3    | natriuretic peptide receptor 3                                                                | -2.884218810 | 0.135445202  | -9.313766203  | 0.000310937 | 1.060434697  | 0.923324446  | 0.715475211  | -0.665682991 | -1.005684618 | -1.027866745 |
| 17512732 | 8  | Nqo1    | NAD(P)H dehydrogenase, quinone 1                                                              | 2.990511145  | 7.947555271  | 8.287587676   | 0.000621880 | -0.921098728 | -0.840088537 | -0.894911886 | 0.443159835  | 1.109652196  | 1.103287118  |
| 17236604 | 10 | Ntm4    | netrin 4                                                                                      | 2.078963536  | 4.225035714  | 5.636677573   | 0.005234003 | -1.203401706 | -0.706451654 | -0.651585797 | 0.336692859  | 0.970817126  | 1.253929172  |
| 17219185 | 1  | Olfml2b | olfactomedin-like 2B                                                                          | 2.027552456  | 4.077125755  | 6.651382244   | 0.002165474 | -0.888993688 | -1.169231198 | -0.610922536 | 0.639111860  | 1.001304265  | 1.028731298  |
| 17318428 | 15 | Oplah   | 5-oxoprolinase (ATP-hydrolysing)                                                              | 2.418649268  | 5.346701994  | 6.754254277   | 0.001989968 | -1.285333596 | -0.938723429 | -0.395083051 | 0.997864997  | 0.792970310  | 0.828304770  |
| 17414729 | 4  | Orm1    | orosomucoid 1                                                                                 | 3.486247057  | 11.206369456 | 6.480478482   | 0.002526782 | -1.016564719 | -1.157008395 | -0.359885685 | 0.684997822  | 0.523740768  | 1.324720209  |
| 17274021 | 12 | Osr1    | odd-skipped related 1 (Drosophila)                                                            | -2.856582854 | 0.138064771  | -9.758119961  | 0.000240068 | 0.779005129  | 0.955143874  | 0.979731166  | -0.890460803 | -0.730562644 | -1.092856722 |
| 17233536 | 10 | P4ha1   | procollagen-proline 2-oxoglutarate 4-dioxygenase (proline 4-hydroxylase), alpha 1 polypeptide | 2.075368691  | 4.214521056  | 5.833450558   | 0.004338383 | -1.319769637 | -0.890513680 | -0.373836646 | 1.023299123  | 0.953929459  | 0.606891381  |
| 17358690 | 19 | Paps2   | 3'-phosphoadenosine 5'-phosphosulfate synthase 2                                              | 2.606020405  | 6.088219632  | 5.528958321   | 0.005784151 | -0.862310492 | -0.748382602 | -0.879685277 | 0.099442138  | 1.030663475  | 1.360272757  |
| 17382224 | 2  | Pax8    | paired box gene 8                                                                             | 4.002067424  | 16.022944905 | 12.161730033  | 7.33E-05    | -0.946492374 | -1.011061268 | -0.750792881 | 1.052715568  | 0.968261828  | 0.687369126  |
| 17472085 | 6  | Pbp2    | phosphati-dylethanolamine binding protein 2                                                   | -2.348565561 | 0.196341145  | -7.054033228  | 0.001512994 | 0.658658314  | 1.246918325  | 0.742446253  | -1.018064896 | -0.596690409 | -1.033267586 |
| 17454082 | 5  | Peolce  | procollagen C-endopeptidase enhancer protein                                                  | 2.616393868  | 6.132153743  | 8.694808717   | 0.000473753 | -0.989260873 | -1.049909073 | -0.661318970 | 0.805238186  | 1.084217606  | 0.811033124  |
| 17438246 | 5  | Pdgfra  | platelet derived growth factor receptor, alpha polypeptide                                    | 3.274381044  | 9.675800637  | 10.056460419  | 0.000207942 | -0.978476499 | -0.846275389 | -0.871590613 | 1.207357832  | 0.728985834  | 0.759998835  |

|          |    |         |                                                                                          |              |              |               |             |              |              |              |              |              |              |
|----------|----|---------|------------------------------------------------------------------------------------------|--------------|--------------|---------------|-------------|--------------|--------------|--------------|--------------|--------------|--------------|
| 17432440 | 4  | Pdpn    | podoplanin                                                                               | 2.908298831  | 7.507324434  | 10.390219585  | 0.000172657 | -1.018711998 | -0.932610449 | -0.774283303 | 0.989652746  | 0.809795713  | 0.926157291  |
| 17251527 | 11 | Perl    | period circadian clock 1                                                                 | 2.382259021  | 5.213524548  | 5.625721242   | 0.005264697 | -1.207253243 | -0.687797833 | -0.625953593 | 1.372408059  | 0.833638701  | 0.314957908  |
| 17231844 | 10 | Perp    | PER1, TP53 apoptosis effector                                                            | -2.336372906 | 0.198007515  | -7.838159579  | 0.000868584 | 0.865972231  | 0.855979420  | 0.972880888  | -1.157175792 | -0.611278129 | -0.926378617 |
| 17282664 | 12 | Pgf     | placental growth factor                                                                  | 2.089434055  | 4.255810918  | 4.871234857   | 0.010285913 | -1.264100454 | -0.369419760 | -0.821806716 | 0.456402785  | 1.437674597  | 0.561249549  |
| 17399845 | 3  | Pglyrp3 | peptidoglycan recognition protein 3                                                      | -2.582092192 | 0.166998588  | -7.627597980  | 0.001006983 | 0.841292981  | 0.545232611  | 1.269930566  | -1.026662251 | -0.820996642 | -0.808797264 |
| 17211305 | 1  | Pt15    | peptidase inhibitor 15                                                                   | 3.073409808  | 8.417604974  | 9.581604270   | 0.000262032 | -0.751855199 | -1.159700395 | -0.783243634 | 1.085034854  | 0.763852559  | 0.845911815  |
| 17227384 | 1  | Pkp1    | plakophilin 1                                                                            | -2.976102162 | 0.127087834  | -9.256495538  | 0.000323310 | 0.749265505  | 0.849068538  | 1.092965176  | -1.165951748 | -0.749925955 | -0.775421516 |
| 17450121 | 5  | Plac8   | placenta-specific 8                                                                      | 2.614289938  | 6.123217536  | 9.587946518   | 0.000262032 | -0.864731417 | -1.034042793 | -0.831141682 | 0.92217493   | 0.841307351  | 0.966433611  |
| 17297537 | 14 | Plau    | plasminogen activator, urokinase                                                         | -2.484574121 | 0.178677005  | -7.347954789  | 0.001220649 | 0.680229994  | 0.970488917  | 0.99969078   | -0.616956490 | -0.745910915 | -1.287820585 |
| 17340050 | 17 | Plekhh2 | plekstrin homology domain containing, family H (with MYTH4 domain) member 2              | 3.14600705   | 8.852022082  | 10.018058114  | 0.000207942 | -0.712316470 | -0.865440823 | -1.124269168 | 0.725668366  | 0.983381584  | 0.992976510  |
| 17394297 | 2  | Pltp    | phospholipid transfer protein                                                            | 2.402910223  | 5.288689301  | 7.892187831   | 0.000841782 | -1.122463004 | -0.956740225 | -0.609872528 | 0.967953002  | 0.728812247  | 0.992310507  |
| 17544220 | X  | Pof1b   | premature ovarian failure 1B                                                             | -3.917738904 | 0.066167248  | -13.719255006 | 3.92E-05    | 0.811305841  | 0.871816660  | 1.045663980  | -0.873282861 | -0.973771318 | -0.881732301 |
| 17397575 | 3  | Postn   | perlestin, osteoblast specific factor                                                    | -6.711497072 | 0.009541970  | -22.905820017 | 1.13E-05    | 0.847910108  | 0.972061634  | 0.914066641  | -0.834018048 | -0.948994641 | -0.951025694 |
| 17416234 | 4  | Ppap2b  | phosphatidic acid phosphatase type 2B                                                    | 2.318740493  | 4.988964808  | 7.210831523   | 0.001329358 | -1.202482750 | -0.913686809 | -0.545708667 | 0.740236912  | 0.844393968  | 1.077247346  |
| 17447835 | 5  | Prom1   | prominin 1                                                                               | -2.889523613 | 0.134948083  | -6.164031645  | 0.003283713 | 0.427946287  | 0.802680146  | 1.303887047  | -0.834864253 | -0.442981243 | -1.256667985 |
| 17391287 | 2  | Prom2   | prominin 2                                                                               | -2.632149195 | 0.161303629  | -9.854432139  | 0.000227134 | 0.932194373  | 0.869553354  | 0.93377962   | -0.987117777 | -0.868011244 | -0.880398326 |
| 17326510 | 16 | Prosl   | protein S (alpha)                                                                        | 2.822061379  | 7.071721108  | 10.395054335  | 0.000172657 | -0.987081358 | -0.859267145 | -0.885819629 | 0.846675080  | 1.006985286  | 0.878507766  |
| 17341671 | 17 | Prss22  | protease, serine, 22                                                                     | -3.007498685 | 0.124351974  | -8.498650331  | 0.000542557 | 0.517048463  | 1.067585146  | 1.078789661  | -0.686541686 | -0.945048240 | -1.031833343 |
| 17357981 | 19 | Prune2  | prune homolog 2 (Drosophila)                                                             | 2.477146186  | 5.567949728  | 6.014345100   | 0.003742169 | -1.158029695 | -1.005466672 | -0.388216463 | 1.298281390  | 0.741197643  | 0.512233796  |
| 17336446 | 17 | Psmb8   | proteasome (prosome, macropain) subunit, beta type 8 (large multifunctional peptidase 7) | 2.471407621  | 5.545846250  | 7.336734564   | 0.001222526 | -1.334304035 | -0.673673360 | -0.643450103 | 0.876876852  | 0.822696306  | 0.951854341  |
| 17383712 | 2  | Ptges   | prostaglandin E synthase                                                                 | 3.385444726  | 10.450099157 | 12.016035558  | 7.92E-05    | -1.017844116 | -0.764475599 | -0.945540287 | 0.857106955  | 0.912648056  | 0.958104991  |
| 17465856 | 6  | Ptn     | pleiotrophin                                                                             | 2.072222999  | 4.205341611  | 7.683783941   | 0.000974335 | -0.811097505 | -0.896213103 | -1.022237031 | 0.833018218  | 0.976752347  | 0.919777073  |

|          |    |         |                                                               |              |              |               |             |              |              |              |              |              |              |
|----------|----|---------|---------------------------------------------------------------|--------------|--------------|---------------|-------------|--------------|--------------|--------------|--------------|--------------|--------------|
| 17401269 | 3  | Ptpn22  | protein tyrosine phosphatase, non-receptor type 22 (lymphoid) | -2.499723758 | 0.176810547  | -7.339713725  | 0.001222526 | 0.790847492  | 0.960014671  | 0.897768389  | -1.278640852 | -0.876809446 | -0.493180254 |
| 17429057 | 4  | Ptprf   | protein tyrosine phosphatase, receptor type, F                | -2.794569346 | 0.144128810  | -9.245896208  | 0.000323310 | 0.863427780  | 0.773536742  | 1.066877269  | -1.003199968 | -0.669482879 | -1.031158945 |
| 17398115 | 3  | Ptx3    | pentraxin related gene                                        | 3.443990003  | 10.882891407 | 8.527863396   | 0.000537334 | -0.863671354 | -1.018530991 | -0.761094615 | 0.940681729  | 1.240582567  | 0.462032663  |
| 17219308 | 1  | Pvr14   | poliovirus receptor-related 4                                 | -2.076832113 | 0.237034324  | -6.548011971  | 0.002389009 | 0.528729558  | 0.892801408  | 1.229905025  | -1.084053193 | -0.723822434 | -0.843560364 |
| 17311853 | 15 | Pvt1    | plasmacytoma variant translocation 1                          | 2.398630068  | 5.273022192  | 7.465413138   | 0.001128754 | -0.980690052 | -0.592447762 | -1.093918941 | 1.167319610  | 0.790814873  | 0.708922272  |
| 17282074 | 12 | Rab15   | RAB15, member RAS oncogene family                             | -2.282985714 | 0.205472081  | -8.434185068  | 0.000569089 | 0.900463328  | 0.968107030  | 0.861262857  | -1.034303822 | -0.886277722 | -0.809251671 |
| 17406807 | 3  | Rab25   | RAB25, member RAS oncogene family                             | -5.093354308 | 0.029291902  | -18.714937036 | 1.13E-05    | 0.906160904  | 0.938191722  | 0.892097183  | -0.867365750 | -0.891123331 | -0.977960729 |
| 17426565 | 4  | Rasef   | RAS and EF hand domain containing                             | -2.667487429 | 0.157400559  | -8.530506534  | 0.000537334 | 0.917444342  | 0.831327475  | 0.940763529  | -1.095251947 | -0.560807314 | -1.033476086 |
| 17470060 | 6  | Rassf4  | Ras association (RalGDS/AF-6) domain family member 4          | 4.301101136  | 19.713351080 | 15.426404864  | 1.93E-05    | -0.935500325 | -0.842922625 | -0.954638497 | 0.887706086  | 1.001085686  | 0.844269676  |
| 17448389 | 5  | Rbm47   | RNA binding motif protein 47                                  | -2.399298778 | 0.189556682  | -8.386080372  | 0.000589060 | 0.807672317  | 0.774336690  | 1.129971875  | -0.996351083 | -0.799405165 | -0.916224634 |
| 17490578 | 7  | Ren3    | reticulocalbin 3, EF-hand calcium binding domain              | 2.682124325  | 6.41800238   | 9.352484049   | 0.000302031 | -0.947755567 | -0.814536951 | -0.954274737 | 0.989699733  | 1.032412144  | 0.694455378  |
| 17542501 | X  | Renbp   | renin binding protein                                         | 2.030069284  | 4.084244639  | 7.530899265   | 0.001087581 | -1.003223963 | -0.927122312 | -0.799025451 | 0.860805420  | 0.867995003  | 1.000571303  |
| 17538096 | X  | Rnf128  | ring finger protein 128                                       | 2.641926216  | 6.241644615  | 8.313562563   | 0.000614458 | -0.960854455 | -1.156671574 | -0.565550727 | 0.784429181  | 0.974438654  | 0.924208921  |
| 17544164 | X  | Rps6ka6 | ribosomal protein S6 kinase polypeptide 6                     | -3.375347991 | 0.096364930  | -10.017566008 | 0.000207942 | 0.944702449  | 0.973067901  | 0.772988069  | -1.199029153 | -0.665656859 | -0.826072408 |
| 17240012 | 10 | Rspo3   | R-spondin 3 homolog (Xenopus laevis)                          | 2.887825785  | 7.401541587  | 8.364395546   | 0.000590654 | -1.203179126 | -0.513218204 | -0.949419119 | 0.991415338  | 0.799408420  | 0.874992690  |
| 17399776 | 3  | S100a14 | S100 calcium binding protein A14                              | -5.162289487 | 0.027925182  | -16.426458141 | 1.52E-05    | 0.845393088  | 0.927111901  | 0.952277961  | -1.053463923 | -0.756599874 | -0.914719153 |
| 17399823 | 3  | S100a8  | S100 calcium binding protein A8 (calgranulin A)               | 2.377722478  | 5.197156411  | 5.168383670   | 0.008005942 | -0.821574116 | -1.006203885 | -0.637464915 | 0.065822362  | 1.091853634  | 1.307566922  |
| 17491193 | 7  | Saa3    | serum amyloid A 3                                             | 3.724280333  | 13.216610537 | 7.931898689   | 0.00082133  | -1.234275915 | -0.841252832 | -0.534056269 | 0.557132282  | 1.209205941  | 0.843246793  |

|          |    |           |                                                                                                                                             |              |              |               |             |              |              |              |              |              |              |
|----------|----|-----------|---------------------------------------------------------------------------------------------------------------------------------------------|--------------|--------------|---------------|-------------|--------------|--------------|--------------|--------------|--------------|--------------|
| 17317031 | 15 | Samd12    | sterile alpha motif domain containing 12                                                                                                    | -3.162140533 | 0.111712263  | -11.411485383 | 0.000110445 | 0.799136133  | 0.935484637  | 0.994950353  | -0.986135903 | -0.916864754 | -0.826570466 |
| 17301414 | 14 | Scara5    | scavenger receptor class A, member 5 (putative)                                                                                             | 2.211485372  | 4.631518807  | 6.123310924   | 0.003401109 | -1.276211389 | -0.859464739 | -0.456918545 | 0.584799351  | 1.185857800  | 0.821937523  |
| 17365098 | 19 | Scd1      | stearoyl-Coenzyme A desaturase 1                                                                                                            | -4.604318782 | 0.041111369  | -14.333063533 | 3.05E-05    | 0.766951289  | 0.946007833  | 1.005689677  | -0.775516018 | -1.061387258 | -0.881745524 |
| 17385924 | 2  | Sen3a     | sodium channel, voltage-gated, type III, alpha                                                                                              | -2.582806743 | 0.166915896  | -8.362646377  | 0.000590654 | 0.833616454  | 1.023614503  | 0.833457447  | -0.767277214 | -1.210880247 | -0.712530944 |
| 17310837 | 15 | Sema5a    | sema domain, seven thrombospondin repeats (type 1 and type 1-like), transmembrane domain (TM) and short cytoplasmic domain, (semaphorin) 5A | -2.098678195 | 0.233472058  | -7.589898617  | 0.001036782 | 0.946797667  | 0.982809435  | 0.7895536479 | -0.954000664 | -1.034738986 | -0.730403932 |
| 17278328 | 12 | Serpina3n | serine (or cysteine) peptidase inhibitor, clade A, member 3N                                                                                | 4.365010337  | 20.606253715 | 12.546034936  | 6.27E-05    | -0.957557141 | -1.077955386 | -0.669317711 | 0.750770833  | 0.965210485  | 0.988848919  |
| 17216402 | 1  | Serpina5  | serine (or cysteine) peptidase inhibitor, clade B, member 5                                                                                 | -3.718497543 | 0.075966252  | -10.306570926 | 0.000177746 | 0.949703350  | 0.902372559  | 0.832343702  | -1.249056477 | -0.698766948 | -0.736596186 |
| 17224771 | 1  | Serpina2  | serine (or cysteine) peptidase inhibitor, clade E, member 2                                                                                 | 2.969083929  | 7.830388721  | 8.522863121   | 0.000537334 | -1.035930327 | -1.012362841 | -0.618413441 | 0.889574709  | 0.615534276  | 1.161597625  |
| 17387517 | 2  | Serpina1  | serine (or cysteine) peptidase inhibitor, clade G, member 1                                                                                 | 2.420229011  | 5.352559809  | 7.968386360   | 0.000804593 | -1.038526849 | -0.753515568 | -0.898648115 | 0.608378370  | 1.104289385  | 0.978022777  |
| 17493658 | 7  | Serpina1  | serine (or cysteine) peptidase inhibitor, clade H, member 1                                                                                 | 5.010303205  | 32.229350404 | 16.381165710  | 1.52E-05    | -0.882377255 | -0.780717415 | -1.063455972 | 0.870177189  | 0.946660438  | 0.909713015  |
| 17211043 | 1  | Sgk3      | serum/glucocorticoid regulated kinase 3                                                                                                     | -2.530760773 | 0.173047407  | -7.095776855  | 0.001452177 | 0.830068179  | 0.875447315  | 0.925172101  | -1.378969352 | -0.668752268 | -0.582965976 |
| 17453714 | 5  | Sh2b2     | SH2B adaptor protein 2                                                                                                                      | 2.249165548  | 4.754077917  | 7.231360379   | 0.001320777 | -1.147168608 | -0.704164653 | -0.821429722 | 1.187779870  | 0.741751281  | 0.743231832  |
| 17501588 | 8  | Sh244a    | SH2 domain containing 4A                                                                                                                    | -3.096722550 | 0.116894378  | -10.411984675 | 0.000172657 | 0.783919124  | 0.898885604  | 1.031135613  | -1.092671546 | -0.75564593  | -0.865622866 |
| 17302523 | 14 | Slain1    | SLAIN motif family, member 1                                                                                                                | -2.267518039 | 0.207686876  | -7.271827812  | 0.001287311 | 0.921086009  | 0.997334375  | 0.754226654  | -0.643252138 | -0.774831109 | -1.254565790 |

|          |    |          |                                                                         |              |             |              |             |              |              |              |              |              |              |
|----------|----|----------|-------------------------------------------------------------------------|--------------|-------------|--------------|-------------|--------------|--------------|--------------|--------------|--------------|--------------|
| 17377144 | 2  | Slc24a3  | solute carrier family 24 (sodium/potassium/calcium exchanger), member 3 | 2.482162925  | 5.587345079 | 8.307626024  | 0.000615227 | -1.018365847 | -0.918261373 | -0.762257239 | 0.905635606  | 0.661417733  | 1.131831121  |
| 17287803 | 13 | Slc25a48 | solute carrier family 25, member 48                                     | -2.130515474 | 0.228376249 | -7.362088315 | 0.001217620 | 1.082337358  | 0.851329399  | 0.766193780  | -1.138082382 | -0.811906642 | -0.749871513 |
| 17359156 | 19 | Slc35g1  | solute carrier family 35, member G1                                     | -2.269310879 | 0.207428944 | -5.970087426 | 0.003882258 | 1.054113127  | 0.763997883  | 0.7520004559 | -1.420592862 | -0.400324277 | -0.749198430 |
| 17455386 | 5  | Slc46a3  | solute carrier family 46, member 3                                      | 2.470430137  | 5.542089991 | 8.155539654  | 0.000700707 | -0.980500307 | -0.807570802 | -0.905481535 | 0.974577235  | 1.123412620  | 0.595562789  |
| 17314556 | 15 | Slc48a1  | solute carrier family 48 (theme transporter), member 1                  | 2.016651438  | 4.046435049 | 7.235825391  | 0.001320777 | -0.895227794 | -0.709208492 | -1.109381719 | 0.961160257  | 0.926970171  | 0.825687577  |
| 17377651 | 2  | Slc52a3  | solute carrier protein family 52, member 3                              | -2.239157385 | 0.211810001 | -7.958811713 | 0.000805618 | 1.035790399  | 0.730044393  | 0.948941625  | -1.061924972 | -0.830877202 | -0.821974243 |
| 17237035 | 10 | Slc6a15  | solute carrier family 6 (neurotransmitter transporter), member 15       | -2.382896395 | 0.191724100 | -7.672679278 | 0.000982078 | 1.000922763  | 0.953506106  | 0.725890677  | -1.153056057 | -0.945644519 | -0.581618971 |
| 17394153 | 2  | Slpi     | secretory leukocyte peptidase inhibitor                                 | 3.234018472  | 9.408850470 | 10.730919564 | 0.000148913 | -0.972306180 | -1.042363705 | -0.698481200 | 0.771857048  | 0.962043517  | 0.979250520  |
| 17272619 | 11 | Socs3    | suppressor of cytokine signaling 3                                      | 2.918227369  | 7.559167561 | 8.238182897  | 0.000647518 | -0.837522580 | -0.719698498 | -1.101391275 | 1.123443446  | 1.019606573  | 0.515562334  |
| 17437385 | 5  | Sod3     | superoxide dismutase 3, extracellular                                   | 2.804512474  | 6.986221936 | 9.123250775  | 0.000349986 | -1.01069485  | -1.008917220 | -0.679577135 | 0.783670518  | 0.799627312  | 1.115891376  |
| 17447404 | 5  | Sorcs2   | sortilin-related VPS10 domain containing receptor 2                     | -2.505655039 | 0.176085127 | -8.764011106 | 0.000451699 | 0.829731990  | 0.773011341  | 1.111649732  | -0.783027645 | -0.962973407 | -0.968392012 |
| 17449800 | 5  | Sowahb   | sosondawah ankyrin repeat domain family member B                        | -2.139895464 | 0.226896229 | -7.470184852 | 0.001128736 | 0.677216347  | 0.951382146  | 1.076115698  | -0.873909162 | -0.776506354 | -1.054298674 |
| 17399880 | 3  | Sprr2g   | small proline-rich protein 2G                                           | 2.466119157  | 5.525554146 | 5.400320576  | 0.006462653 | -1.361901780 | -0.930926555 | -0.193909819 | 0.510150824  | 1.105117622  | 0.871469709  |
| 17397170 | 3  | Spry1    | sprouty homolog 1 (Drosophila)                                          | -2.123500060 | 0.229489482 | -5.305754669 | 0.007126760 | 0.879577996  | 0.69648899   | 0.937485415  | -0.406810813 | -0.564652248 | -1.542089340 |
| 17356240 | 19 | Spibn2   | spectrin beta, non-erythrocytic 2                                       | -2.881272227 | 0.135722120 | -8.497677828 | 0.000542557 | 0.788051652  | 0.624170633  | 1.259297022  | -0.855314124 | -0.801580905 | -1.014624279 |
| 17375538 | 2  | Sqrdl    | sulfide quinone reductase-like (yeast)                                  | 3.087029198  | 8.497445468 | 9.501921141  | 0.000271849 | -1.22324763  | -0.758909213 | -0.709627047 | 0.889319203  | 0.967652888  | 0.834811799  |
| 17241409 | 10 | Srgn     | serglycin                                                               | 2.842826025  | 7.174240081 | 7.371473598  | 0.001213454 | -1.338442426 | -0.802494570 | -0.480756380 | 1.039555803  | 0.815479049  | 0.766658525  |

|          |    |         |                                                                       |              |              |               |             |              |              |              |              |              |              |
|----------|----|---------|-----------------------------------------------------------------------|--------------|--------------|---------------|-------------|--------------|--------------|--------------|--------------|--------------|--------------|
| 17525240 | 9  | Stl14   | suppression of tumorigenicity 14 (colon carcinoma)                    | -2.877379880 | 0.136088788  | -8.109138994  | 0.000727912 | 0.839411759  | 0.863300949  | 0.953115942  | -1.026448533 | -0.453696293 | -1.175683825 |
| 17317675 | 15 | St3gal1 | ST3 beta-galactoside alpha-2,3-sialyltransferase 1                    | 2.894456941  | 7.435640093  | 10.040963377  | 0.000207942 | -0.984384470 | -1.038746777 | -0.695248220 | 0.951472670  | 0.849232014  | 0.917674783  |
| 17301594 | 14 | Stc1    | stammocalcin 1                                                        | 3.785459327  | 13.789128057 | 12.482408087  | 6.39E-05    | -0.834473788 | -1.030204416 | -0.854284216 | 0.788929253  | 1.082505857  | 0.847522731  |
| 17330183 | 16 | Stfa3   | stefin A3                                                             | 2.511805062  | 5.703332180  | 4.383078888   | 0.016422221 | -0.772208141 | -0.611981895 | -0.945177575 | 0.241442294  | 0.373962041  | 1.7139063276 |
| 17384457 | 2  | Stom    | stomatin                                                              | 2.962707913  | 7.795858544  | 8.923773593   | 0.000398122 | -1.205699352 | -0.648009579 | -0.827769427 | 1.029835851  | 0.917054664  | 0.734587843  |
| 17517848 | 9  | Stra6   | stimulated by retinoic acid gene 6                                    | 2.82628163   | 7.092437980  | 7.779048011   | 0.000906140 | -0.668939631 | -0.84609985  | -1.129099151 | 0.633256094  | 0.741876905  | 1.269005634  |
| 17394538 | 2  | Sulf2   | sulfatase 2                                                           | 2.825774434  | 7.089944992  | 8.291088552   | 0.000621880 | -0.683113698 | -1.259820220 | -0.724261378 | 0.863257171  | 0.744894522  | 1.059043603  |
| 17490939 | 7  | Sulf2b1 | sulfotransferase family, cytosolic, 2B, member 1                      | -2.530769758 | 0.173046329  | -7.643564843  | 0.000997529 | 0.767479885  | 0.956651648  | 0.938166088  | -1.297370831 | -0.704292254 | -0.660634536 |
| 17425816 | 4  | Susd1   | sushi domain containing 1                                             | -2.343719906 | 0.197001715  | -8.377930646  | 0.000589060 | 0.720099851  | 1.045766798  | 0.952995503  | -0.975618919 | -0.807019680 | -0.936223553 |
| 17485200 | 7  | Syr8    | synaptotagmin VIII                                                    | -2.037900161 | 0.243517919  | -7.240775578  | 0.001319353 | 0.853469007  | 0.750170303  | 1.106098764  | -0.932756822 | -0.753371755 | -1.023609498 |
| 17480102 | 7  | Syt12   | synaptotagmin-like 2                                                  | 3.249063102  | 9.507480677  | 10.576272497  | 0.000156631 | -0.948594420 | -0.962250905 | -0.798375805 | 0.825872598  | 1.143257377  | 0.740091156  |
| 17467359 | 6  | Tacsd2  | tumor-associated calcium signal transducer 2                          | -2.743151032 | 0.149358264  | -6.453267156  | 0.002560144 | 0.785607744  | 0.624811606  | 1.157317962  | -1.239475982 | -0.321635209 | -1.006626121 |
| 17257405 | 11 | Tanc2   | tetratricopeptide repeat, ankyrin repeat and coiled-coil containing 2 | 2.128474241  | 4.372548060  | 6.341134483   | 0.002831282 | -0.895040669 | -1.275218915 | -0.454696935 | 1.016967277  | 0.664473161  | 0.943516081  |
| 17283364 | 12 | Tc2n    | tandem C2 domains, nuclear                                            | -3.444812002 | 0.091835006  | -11.570220610 | 0.000101818 | 0.756337449  | 0.948372852  | 1.013717357  | -1.014804314 | -0.951625683 | -0.75199766  |
| 17259907 | 11 | Tcn2    | transcobalamin 2                                                      | 2.264359486  | 4.804410709  | 7.178282816   | 0.001356945 | -1.225804602 | -0.855258917 | -0.586163786 | 1.023458248  | 0.931182602  | 0.712586456  |
| 17400072 | 3  | Tdrkh   | tudor and KH domain containing protein                                | -2.220703458 | 0.214536726  | -6.486103604  | 0.002525422 | 1.098080186  | 0.901362215  | 0.623813052  | -1.279049592 | -0.508991340 | -0.835214521 |
| 17450618 | 5  | Tgfb3   | transforming growth factor, beta receptor III                         | 3.662866622  | 12.665802841 | 10.261231999  | 0.000181589 | -0.843941891 | -0.977599655 | -0.863729865 | 1.189090502  | 0.910597134  | 0.585837775  |
| 17374488 | 2  | Thbs1   | thrombospondin 1                                                      | -2.098196546 | 0.233550017  | -6.074420239  | 0.003540398 | 0.861226410  | 0.633636860  | 1.110260436  | -0.546156474 | -0.708426581 | -1.350540651 |
| 17312191 | 15 | Them6   | thioesterase superfamily member 6                                     | 2.164706341  | 4.483751557  | 7.516702841   | 0.001092913 | -0.884574662 | -0.715466329 | -1.103129860 | 0.790854746  | 0.824225419  | 1.088090686  |
| 17330478 | 16 | Tigit   | T cell immunoreceptor with Ig and ITIM domains                        | -3.356940988 | 0.097602304  | -7.820603044  | 0.000881101 | 0.965605560  | 0.981548648  | 0.670237172  | -1.360404748 | -0.712877895 | -0.544108736 |

|          |    |           |                                                                   |              |              |               |             |              |              |              |              |              |               |
|----------|----|-----------|-------------------------------------------------------------------|--------------|--------------|---------------|-------------|--------------|--------------|--------------|--------------|--------------|---------------|
| 17243406 | 10 | Tle6      | transducin-like enhancer of split 6, homolog of Drosophila E(spl) | 2.114814195  | 4.331342311  | 7.245271293   | 0.001319353 | -1.105708740 | -0.882151381 | -0.707474990 | 0.822832401  | 1.121332287  | 0.751170422   |
| 17509101 | 8  | Tlr3      | toll-like receptor 3                                              | -3.549069290 | 0.085432613  | -7.722435355  | 0.000942560 | 0.747226278  | 0.790160066  | 1.068168963  | -1.159286856 | -1.101633100 | -0.344635352  |
| 17485553 | 7  | Tme4      | transmembrane channel-like gene family 4                          | -4.105131142 | 0.058107527  | -12.533173583 | 6.27E-05    | 0.695199276  | 0.943796189  | 1.071565216  | -0.977967857 | -0.765463302 | -0.967129522  |
| 17255058 | 11 | Tmem100   | transmembrane protein 100                                         | 3.751867320  | 13.471768243 | 11.020113375  | 0.000128958 | -0.768001249 | -0.831595316 | -1.098026505 | 0.705104399  | 1.120202001  | 0.872316670   |
| 17454500 | 5  | Tmem184a  | transmembrane protein 184a                                        | -2.794026340 | 0.144183068  | -9.101535203  | 0.000350540 | 0.817408462  | 0.747439889  | 1.134453411  | -0.878183838 | -0.742109596 | -1.079008328  |
| 17418934 | 4  | Tmem54    | transmembrane protein 54                                          | -4.670851014 | 0.039258503  | -15.667652944 | 1.87E-05    | 0.958640778  | 0.908608514  | 0.860194544  | -1.063750723 | -0.831219909 | -0.832473204  |
| 17449301 | 5  | Tmprss11e | transmembrane protease, serine 11e                                | -6.24990195  | 0.013139096  | -19.901000161 | 1.13E-05    | 0.929031861  | 0.802257713  | 0.997908663  | -0.972482130 | -0.812352630 | -0.944363477  |
| 17332568 | 16 | Tmprss2   | transmembrane protease, serine 2                                  | -2.891163721 | 0.134794756  | -9.646334109  | 0.000253442 | 0.778277221  | 0.879141268  | 1.050916684  | -0.957723670 | -0.691710573 | -1.0589000929 |
| 17426365 | 4  | Tnc       | tenascin C                                                        | 3.853118690  | 14.451213004 | 9.729062912   | 0.000244541 | -0.803445334 | -1.036433032 | -0.826729756 | 1.232015185  | 0.875268322  | 0.559324616   |
| 17344309 | 17 | Tnf       | tumor necrosis factor                                             | 2.721978962  | 6.597772178  | 8.924141960   | 0.000398122 | -0.839060521 | -0.944089378 | -0.916078248 | 1.139343906  | 0.939236457  | 0.620647786   |
| 17370735 | 2  | Tnfaiip6  | tumor necrosis factor alpha induced protein 6                     | 2.418078448  | 5.344586924  | 8.566152525   | 0.000522982 | -0.784063009 | -1.031965118 | -0.900977568 | 0.784889002  | 1.079953938  | 0.852162756   |
| 17217651 | 1  | Tnfr2     | troponin T2, cardiac                                              | -2.930814297 | 0.131140545  | -8.734036153  | 0.000458608 | 0.607425841  | 1.120572809  | 0.948964338  | -0.979508475 | -1.041994366 | -0.655460146  |
| 17338210 | 17 | Ttrf1     | transcriptional regulating factor 1                               | 2.000670917  | 4.001860609  | 7.230760439   | 0.001320777 | -1.055811126 | -0.801504903 | -0.859587020 | 1.074162050  | 0.841862045  | 0.800878954   |
| 17241308 | 10 | Tspan15   | tetraspanin 15                                                    | 2.684402138  | 6.428143510  | 9.600141279   | 0.000261203 | -0.933613245 | -0.875973090 | -0.914057029 | 0.777336480  | 0.856470206  | 1.089836678   |
| 17544385 | X  | Tspan6    | tetraspanin 6                                                     | -3.058150508 | 0.120061832  | -11.226193011 | 0.000117069 | 0.950951757  | 0.83902638   | 0.942457208  | -0.842925820 | -0.882093604 | -1.00741592   |
| 17533269 | X  | Tspan7    | tetraspanin 7                                                     | -3.142198525 | 0.113267155  | -10.992224821 | 0.000130091 | 0.839705197  | 1.038125260  | 0.845340563  | -0.939917118 | -0.770901995 | -1.012351907  |
| 17400599 | 3  | Txnip     | thioredoxin interacting protein                                   | 3.859264397  | 14.512904744 | 4.500688338   | 0.014667483 | -1.157139752 | -0.497652096 | -0.646203506 | -0.051797424 | 1.512023500  | 0.840769277   |
| 17449649 | 5  | U90926    | cDNA sequence U90926                                              | 3.680001397  | 12.817130455 | 6.985019006   | 0.001605940 | -0.745926892 | -0.838962648 | -0.976591014 | 0.229681768  | 1.080435263  | 1.251363523   |
| 17372604 | 2  | Ube2l6    | ubiquitin-conjugating enzyme E2L 6                                | 2.187610204  | 4.555502511  | 5.849794184   | 0.004291224 | -1.418188403 | -0.571745924 | -0.578743186 | 0.672419274  | 0.752094375  | 1.144163864   |
| 17413221 | 4  | Unc13b    | unc-13 homolog B (C. elegans)                                     | -2.002077264 | 0.249640297  | -7.400065420  | 0.001184290 | 0.890615723  | 0.808917275  | 1.027907937  | -1.004597606 | -0.897134646 | -0.825708683  |
| 17356002 | 19 | Unc93b1   | unc-93 homolog B1 (C. elegans)                                    | 2.889483107  | 7.410049124  | 8.928243962   | 0.000398122 | -1.235736774 | -0.685046556 | -0.765740322 | 0.840381167  | 0.982003660  | 0.864138824   |
| 17548193 | 2  | Vim       | vimentin                                                          | 3.238928808  | 9.440928856  | 10.232355568  | 0.000183032 | -0.972021002 | -0.914493880 | -0.815694237 | 1.172502296  | 0.698687294  | 0.831019529   |
| 17279980 | 12 | Vsn11     | visinin-like 1                                                    | -5.085425799 | 0.029453323  | -18.119971819 | 1.13E-05    | 0.894831735  | 0.926696548  | 0.912604681  | -0.932895433 | -0.987624977 | -0.813612553  |
| 17420154 | 4  | Wnt4      | wingless-related MMTV integration site 4                          | -2.101856326 | 0.232958306  | -7.629017703  | 0.001006983 | 0.741930401  | 0.980751806  | 0.998083997  | -0.853142658 | -1.032888157 | -0.834735390  |

|          |    |         |                                                 |              |             |              |             |              |              |              |              |              |              |
|----------|----|---------|-------------------------------------------------|--------------|-------------|--------------|-------------|--------------|--------------|--------------|--------------|--------------|--------------|
| 17469016 | 6  | Wnt7a   | wingless-related<br>MMTV integration<br>site 7A | -2.035025157 | 0.244003685 | -6.092973988 | 0.003486265 | 0.711434324  | 1.298630022  | 0.607925371  | -1.106383567 | -0.567008427 | -0.944597724 |
| 17395079 | 2  | Zbp1    | Z-DNA binding<br>protein 1                      | 2.746940519  | 6.712920322 | 4.861427753  | 0.010416704 | -1.486134280 | -0.583899973 | -0.324228524 | 0.951955492  | 0.274500992  | 1.167806292  |
| 17535448 | X  | Zfp185  | zinc finger protein<br>185                      | -2.355400720 | 0.195413126 | -6.165583821 | 0.003283713 | 0.793632326  | 0.653204824  | 1.131548566  | -1.403540640 | -0.548613853 | -0.626231223 |
| 17264053 | 11 | Zfp287  | zinc finger protein<br>287                      | 2.142238498  | 4.414464674 | 7.556585595  | 0.001070382 | -0.980569701 | -0.814378045 | -0.914378729 | 0.986440837  | 0.659019976  | 1.063865663  |
| 17486474 | 7  | Zscan4b | zinc finger and<br>SCAN domain<br>containing 4B | -2.030202113 | 0.244820774 | -6.007125825 | 0.003753263 | 0.793496371  | 0.875424610  | 0.941349754  | -0.621594527 | -0.573589000 | -1.415087208 |
| 17486496 | 7  | Zscan4e | zinc finger and SCAN<br>domain containing 4E    | -2.558027544 | 0.169807544 | -8.740947462 | 0.000457996 | 0.776484047  | 0.86521794   | 1.066270224  | -1.024730331 | -0.991311263 | -0.691930618 |

382 DE genes identified under the threshold of fold change (FC) of 4 or greater and significance less than 0.05.

**Supplementary Table S2: Biological process gene ontology (GO) analysis of DE genes**

| Term                                                                                  | Genes Count | Overlapping Entities                                                                                                                                                                                                                          |
|---------------------------------------------------------------------------------------|-------------|-----------------------------------------------------------------------------------------------------------------------------------------------------------------------------------------------------------------------------------------------|
| cell adhesion                                                                         | 40          | PKP1,DSG2,CDH17,FAT2,CDH10,PPAP2B,EPHA4,EPHA1,ITGB7,ITGA7,ITGB3,ITGB4,ITGB6,PVRL4,AEBP1,MPZL2,SOBRS2,FERMT2,LAMA4,COL6A3,POSTN,CCL2,CTGF,THBS1,PTPRF,SEMA5A,HPSE,NPNT,PDPN,GPNMB,CDHR1,PERP,LAMC2,LAMA3,MSLN,FERMT1,MPZL3,ADAM12,TNFAIP6,ISLR |
| cell-cell signaling                                                                   | 12          | GJB2,CCL2,CCL5,CCL7,FGF13,STC1,WNT7A,WNT4,SEMA5A,TNFAIP6,GDF15,FGFBP1                                                                                                                                                                         |
| regulation of apoptotic process                                                       | 11          | PAX8,IGF2R,FAS,DAPK1,IL6,IRAK3,LCN2,CASP4,PSMB8,CASP1,DYNAP                                                                                                                                                                                   |
| cell migration                                                                        | 9           | FLT1,PDGFRA,ITGA7,TGFBR3,CTGF,THBS1,MMP2,FMNL3,ST14                                                                                                                                                                                           |
| cell-cell adhesion                                                                    | 7           | PKP1,CDH10,PPAP2B,PVRL4,MPZL2,PDPN,LAMA3                                                                                                                                                                                                      |
| Apoptosis                                                                             | 7           | FAS,GAS7,DNASE1L3,DAPK1,SH2B2,CASP4,AMOT                                                                                                                                                                                                      |
| epithelial to mesenchymal transition                                                  | 7           | HIF1A,TGFBR3,WNT4,VIM,CDH1,KRT14,KRT18                                                                                                                                                                                                        |
| response to oxidative stress                                                          | 6           | NQO1,SOD3,MMP2,LCN2,TXNIP,DGKK                                                                                                                                                                                                                |
| cell-cell junction organization                                                       | 5           | CDH10,PVRL4,HEG1,MARVELD2,MARVELD3                                                                                                                                                                                                            |
| canonical Wnt signaling pathway                                                       | 5           | PPAP2B,FZD6,WNT7A,WNT4,RSPO3                                                                                                                                                                                                                  |
| positive regulation of MAPK cascade                                                   | 4           | FLT1,IGFBP3,IL6,IGFBP4                                                                                                                                                                                                                        |
| non-canonical Wnt signaling pathway                                                   | 3           | FZD6,WNT7A,WNT4                                                                                                                                                                                                                               |
| vascular endothelial growth factor receptor signaling pathway                         | 3           | FLT1,CCL2,FIGF                                                                                                                                                                                                                                |
| positive regulation of reactive oxygen species metabolic process                      | 3           | AKR1C3,THBS1,PLAU                                                                                                                                                                                                                             |
| negative regulation of cell death                                                     | 3           | PTGES3,CCL5,CTGF                                                                                                                                                                                                                              |
| angiogenesis involved in wound healing                                                | 2           | ITGB3,HPSE                                                                                                                                                                                                                                    |
| Wnt signaling pathway involved in wound healing, spreading of epidermal cells         | 1           | WNT7A                                                                                                                                                                                                                                         |
| canonical Wnt signaling pathway involved in positive regulation of cell-cell adhesion | 1           | PPAP2B                                                                                                                                                                                                                                        |
| non-canonical Wnt signaling pathway via MAPK cascade                                  | 1           | WNT4                                                                                                                                                                                                                                          |
| canonical Wnt signaling pathway involved in positive regulation of wound healing      | 1           | PPAP2B                                                                                                                                                                                                                                        |

Many categories shared the same transcripts.

**Supplementary Table S3: DE genes and their relation to some biological processes**

| Gene Symbol                                                   | Gene Description                                           | Fold Change | Adjusted P Value |
|---------------------------------------------------------------|------------------------------------------------------------|-------------|------------------|
| <b><i>DE genes and their relation to cell migration</i></b>   |                                                            |             |                  |
| <i>Flt1</i>                                                   | FMS-like tyrosine kinase 1                                 | 7.82        | 0.000164         |
| <i>Pdgfra</i>                                                 | platelet derived growth factor receptor, alpha polypeptide | 9.68        | 0.000208         |
| <i>Iga7</i>                                                   | integrin alpha 7                                           | 7.77        | 0.000825         |
| <i>Tgfb3</i>                                                  | transforming growth factor, beta receptor III              | 12.67       | 0.000182         |
| <i>Ctgf</i>                                                   | connective tissue growth factor                            | -12.99      | 0.000135         |
| <i>Thbs1</i>                                                  | thrombospondin 1                                           | -4.28       | 0.00354          |
| <i>Mmp2</i>                                                   | matrix metalloproteinase 2                                 | 33.3        | 1.20E-05         |
| <i>Fmn13</i>                                                  | formin-like 3                                              | 6.04        | 0.000523         |
| <i>St14</i>                                                   | suppression of tumorigenicity 14 (colon carcinoma)         | -7.35       | 0.000728         |
| <b><i>DE genes and their relation to oxidative stress</i></b> |                                                            |             |                  |
| <i>Nqo1</i>                                                   | NAD(P)H dehydrogenase, quinone 1                           | 7.95        | 0.000622         |
| <i>Sod3</i>                                                   | superoxide dismutase 3, extracellular                      | 6.99        | 0.00035          |
| <i>Mmp2</i>                                                   | matrix metalloproteinase 2                                 | 33.3        | 1.20E-05         |
| <i>Lcn2</i>                                                   | lipocalin 2                                                | 5.31        | 0.005902         |
| <i>Txnip</i>                                                  | thioredoxin interacting protein                            | 14.51       | 0.014667         |
| <i>Dgkk</i>                                                   | diacylglycerol kinase kappa                                | -12.63      | 5.27E-05         |
| <b><i>DE genes and their relation to vasculogenesis</i></b>   |                                                            |             |                  |
| <i>Angpt1</i>                                                 | angiopoietin 1                                             | 5.63        | 0.000906         |
| <i>Amot</i>                                                   | angiominin                                                 | -4.5        | 0.003788         |
| <i>Heg1</i>                                                   | HEG homolog 1 (zebrafish)                                  | 11.09       | 0.000117         |
| <i>Tmem100</i>                                                | transmembrane protein 100                                  | 13.47       | 0.000129         |
| <b><i>DE genes and their relation to angiogenesis</i></b>     |                                                            |             |                  |
| <i>Hif1a</i>                                                  | hypoxia inducible factor 1, alpha subunit                  | 4.18        | 0.001717         |
| <i>Fzd6</i>                                                   | frizzled homolog 6 (Drosophila)                            | -4.8        | 0.002185         |
| <i>Ephb2</i>                                                  | Eph receptor B2                                            | -4.98       | 0.000806         |
| <i>Epha1</i>                                                  | Eph receptor A1                                            | -4.92       | 0.001452         |
| <i>Flt1</i>                                                   | FMS-like tyrosine kinase 1                                 | 7.82        | 0.000164         |
| <i>Ccl2</i>                                                   | chemokine (C-C motif) ligand 2                             | 8.92        | 0.000272         |
| <i>Ctgf</i>                                                   | connective tissue growth factor                            | -12.99      | 0.000135         |
| <i>Angpt1</i>                                                 | angiopoietin 1                                             | 5.63        | 0.000906         |
| <i>Figf</i>                                                   | c-fos induced growth factor                                | 6.54        | 0.001357         |
| <i>Plau</i>                                                   | plasminogen activator, urokinase                           | -5.6        | 0.001221         |
| <i>Mmp2</i>                                                   | matrix metalloproteinase 2                                 | 33.3        | 1.20E-05         |
| <i>Ecm1</i>                                                   | extracellular matrix protein 1                             | 4.35        | 0.002067         |
| <i>Tmem100</i>                                                | transmembrane protein 100                                  | 13.47       | 0.000129         |
| <b><i>DE genes and their relation to proteolysis</i></b>      |                                                            |             |                  |
| <i>Aebp1</i>                                                  | AE binding protein 1                                       | 67.59       | 1.13E-05         |
| <i>Mmp2</i>                                                   | matrix metalloproteinase 2                                 | 33.3        | 1.20E-05         |
| <i>Mmp13</i>                                                  | matrix metalloproteinase 13                                | 7.09        | 0.001138         |
| <i>Mmp3</i>                                                   | matrix metalloproteinase 3                                 | 5.3         | 0.004606         |
| <i>Plau</i>                                                   | plasminogen activator, urokinase                           | -5.6        | 0.001221         |
| <i>Casp4</i>                                                  | caspase 4, apoptosis-related cysteine peptidase            | 4.09        | 0.021065         |
| <i>Casp1</i>                                                  | caspase 1                                                  | 79.7        | 1.13E-05         |

|                  |                                                                                          |        |          |
|------------------|------------------------------------------------------------------------------------------|--------|----------|
| <i>Adam12</i>    | a disintegrin and metallopeptidase domain 12 (meltrin alpha)                             | -7.14  | 0.000222 |
| <i>Cfb</i>       | complement factor B                                                                      | 4.64   | 0.000862 |
| <i>Psmb8</i>     | proteasome (prosome, macropain) subunit, beta type 8 (large multifunctional peptidase 7) | 5.55   | 0.001223 |
| <i>Masp1</i>     | mannan-binding lectin serine peptidase 1                                                 | 4.07   | 0.001321 |
| <i>Pros1</i>     | protein S (alpha)                                                                        | 7.07   | 0.000173 |
| <i>Pcolce</i>    | procollagen C-endopeptidase enhancer protein                                             | 6.13   | 0.000474 |
| <i>St14</i>      | suppression of tumorigenicity 14 (colon carcinoma)                                       | -7.35  | 0.000728 |
| <i>Slpi</i>      | secretory leukocyte peptidase inhibitor                                                  | 9.42   | 0.000149 |
| <i>Pi15</i>      | peptidase inhibitor 15                                                                   | 8.42   | 0.000262 |
| <i>Prss22</i>    | protease, serine, 22                                                                     | -8.04  | 0.000543 |
| <i>Tmprss2</i>   | transmembrane protease, serine 2                                                         | -7.42  | 0.000253 |
| <i>Tmprss11e</i> | transmembrane protease, serine 11e                                                       | -76.12 | 1.13E-05 |

***DE genes and their relation to EMT***

|               |                                               |        |             |
|---------------|-----------------------------------------------|--------|-------------|
| <i>Hif1a</i>  | hypoxia inducible factor 1, alpha subunit     | 4.18   | 0.001717    |
| <i>Tgfbr3</i> | transforming growth factor, beta receptor III | 12.67  | 0.000182    |
| <i>Wnt4</i>   | wingless-related MMTV integration site 4      | -4.29  | 0.001006983 |
| <i>Vim</i>    | vimentin                                      | 9.44   | 0.000183032 |
| <i>Krt14</i>  | keratin 14                                    | -9.64  | 0.000989648 |
| <i>Krt18</i>  | keratin 18                                    | -4.61  | 0.002544156 |
| <i>Cdh1</i>   | cadherin 1                                    | -28.48 | 1.13E-05    |

**Supplementary Table S4: Interaction analysis of some molecular and biological processes in PLum-AD and PLum-AI cells**

| Relation                  | Type       | Sentence                                                                                                                                                                                                                                                                                                                                                                                                                                                                                                                                                                                                                                                                                                                                                                                                                                                                                                            | TextRef                                                                                                                                                                                                                                                                                     | Connectivity | # of References | Organ                                                                                                                                                                                                                                                                                                                 |
|---------------------------|------------|---------------------------------------------------------------------------------------------------------------------------------------------------------------------------------------------------------------------------------------------------------------------------------------------------------------------------------------------------------------------------------------------------------------------------------------------------------------------------------------------------------------------------------------------------------------------------------------------------------------------------------------------------------------------------------------------------------------------------------------------------------------------------------------------------------------------------------------------------------------------------------------------------------------------|---------------------------------------------------------------------------------------------------------------------------------------------------------------------------------------------------------------------------------------------------------------------------------------------|--------------|-----------------|-----------------------------------------------------------------------------------------------------------------------------------------------------------------------------------------------------------------------------------------------------------------------------------------------------------------------|
| KRT18 ---> apoptosis      | Regulation | The KRT18 gene, which is involved in apoptosis, had reduced expression. The present study tested whether CK18 expression influences susceptibility to cytokine-induced apoptosis. A cytokerin 18-Asp396 neopeptide elevation, indicative of chemotherapy-induced apoptosis, is linked to good prognosis. The cleavage of cytokeratin-18 (CK-18) by caspases is an early event in the apoptotic process. We have shown previously that a K8/K18 loss leads to a modulation of apoptosis in Fas-stimulated mouse hepatocytes. <more data available...>                                                                                                                                                                                                                                                                                                                                                                | info:pmid/222653643#abs:10,<br>info:pmid/21119362#abs:3,<br>info:pmid/16821621#abs:8,<br>info:pmid/17847110#abs:2,<br>info:pmid/18486629#abs:3,<br>info:pmid/15194421#abs:4,<br>info:pmid/22114688#abs:5,<br>info:pmid/17969036#abs:9,<br>info:pmid/23167970#abs:8 <more data available...> | 2            | 38              | Retina {Organ urn: agi-ncimorgan: C1962966}, Liver {Organ urn: agi-ncimorgan: CL384198}, Heart {Organ urn: agi-ncimorgan: C1281570}, jejunum {Organ urn: agi-ncimorgan: C1278922}, Villus {Organ urn: agi-ncimorgan: C1519988}, Gland {Organ urn: agi-ncimorgan: C1285092}, head {Organ urn: agi-ncimorgan: C0018670} |
| ITGA7 ---> cell migration | Regulation | The Integrin $\alpha 7$ Cytoplasmic Domain Controls Integrin $\alpha 7$ -mediated Cell Migration and Polarization. Forced expression of normal ITGA7 in prostate cancer and leiomyosarcoma cell lines suppressed tumor growth and cancer cell migration <i>in vitro</i> . The forced expression of normal ITGA7 in prostate cancer and leiomyosarcoma cell lines suppressed tumor growth and cancer cell migration <i>in vitro</i> .                                                                                                                                                                                                                                                                                                                                                                                                                                                                                | info:pmid/11278916#body:210,<br>info:pmid/20651226#body:13,<br>info:pmid/23830872#body:12                                                                                                                                                                                                   | 2            | 3               |                                                                                                                                                                                                                                                                                                                       |
| CLDN7 ---> apoptosis      | Regulation | Additionally, EpCAM-CLDN7 complex was suggested to have role in migration, proliferation, apoptosis resistance, metastasis, and tumorigenicity [37], [39]. Furthermore, EpCAM is one of the surface markers in pancreatic cancer stem cells, and claudin-7 regulates the EpCAM-mediated functions in tumor progression, including those in pancreatic cancer, such as proliferation, migration, and anti-apoptosis. In addition, site-directed protease-null mutant high temperature requirement A2S306A expression blocked apoptosis induced by ITGA7. In this study, expression of the $\alpha 7$ integrin transgene did suppress apoptosis in 7BX2- mdx/utr $-/-$ mice compared to mdx/utr $-/-$ mice. Concomitantly, integrin $\alpha 7$ silencing promoted apoptotic signaling and made airway smooth muscle cells refractory to the suppressive effects of serum deprivation on caspase 3 activity (Fig. 3C). | info:pmid/21789222#cont:170,<br>info:pmid/20566751#body:192                                                                                                                                                                                                                                 | 2            | 2               |                                                                                                                                                                                                                                                                                                                       |
| ITGA7 ---> apoptosis      | Regulation | In addition, site-directed protease-null mutant high temperature requirement A2S306A expression blocked apoptosis induced by ITGA7. In this study, expression of the $\alpha 7$ integrin transgene did suppress apoptosis in 7BX2- mdx/utr $-/-$ mice compared to mdx/utr $-/-$ mice. Concomitantly, integrin $\alpha 7$ silencing promoted apoptotic signaling and made airway smooth muscle cells refractory to the suppressive effects of serum deprivation on caspase 3 activity (Fig. 3C).                                                                                                                                                                                                                                                                                                                                                                                                                     | info:pmid/20651226#abs:7,<br>info:pmid/21216283#body:150,<br>info:pmid/23756649#cont:375                                                                                                                                                                                                    | 2            | 3               | airway {Organ urn: agi-ncimorgan: C0458827}                                                                                                                                                                                                                                                                           |

|                          |            |                                                                                                                                                                                                                                                                                                                                                                                                                                                                                                                                                                                                                                                 |                                                                                                                                                                                                                                                                                                   |   |     |                                                                                                                                                                                                                                                                                                                                                                 |
|--------------------------|------------|-------------------------------------------------------------------------------------------------------------------------------------------------------------------------------------------------------------------------------------------------------------------------------------------------------------------------------------------------------------------------------------------------------------------------------------------------------------------------------------------------------------------------------------------------------------------------------------------------------------------------------------------------|---------------------------------------------------------------------------------------------------------------------------------------------------------------------------------------------------------------------------------------------------------------------------------------------------|---|-----|-----------------------------------------------------------------------------------------------------------------------------------------------------------------------------------------------------------------------------------------------------------------------------------------------------------------------------------------------------------------|
| TXNIP --> apoptosis      | Regulation | TIEG and VDUP1 play important roles in mediating apoptosis. Thioredoxin-interacting protein (Txnip) is a modulator of cellular redox state and contributes to cell apoptosis. Furthermore, the Itch-TXNIP interaction regulates intracellular reactive oxygen species levels and apoptosis. TXNIP promoted reactive oxygen species production and apoptosis by inhibiting thioredoxin. TXNIP increases the production of reactive oxygen species, and oxidative stress, resulting in cellular apoptosis. Overexpression of vitamin D(3)-up-regulated protein-1 but not of thioredoxin induced cardiomyocyte apoptosis. <more data available...> | info:pmid/15000885#abs:6, info:pmid/23305039#abs:2, info:pmid/20068034#abs:11, info:pmid/22869588#abs:9, info:pmid/22750447#abs:2, info:pmid/12011048#abs:7, info:pmid/16562669#abs:6, info:pmid/16529693#abs:6, info:pmid/18171713#abs:6, info:pmid/22474421#abs:1 <more data available...>      | 2 | 91  | Heart {Organ urn: agi-ncimorgan: C1281570}, Islets of Langerhans {Organ urn: agi-ncimorgan: C0022131}, Breast {Organ urn: agi-ncimorgan: C0006141}, liver parenchyma {Organ urn: agi-ncimorgan: C0736268}, Ovary {Organ urn: agi-ncimorgan: CL384202}, Retina {Organ urn: agi-ncimorgan: C1962966}, Pancreas {Organ urn: agi-ncimorgan: C1278931}               |
| THBS1 --> cell migration | Regulation | Our results show that TSP1 is a potent stimulator of prostate tumor cell migration. TSP-1 stimulated cell migration at low concentrations (0.1–10 microg/ml) and was inhibitory at high concentrations (25–100 microg/ml). In addition, thrombospondin-1 regulation in hypoxia proved to be important for cell renal carcinoma cell lines cell migration and invasion. Furthermore, we found that wpPTEN inhibited EGF—but not TSP-1—stimulated FTC-133 cell migration and also inhibited invasion induced by EGF and by TSP-1. <more data available...>                                                                                        | info:pmid/22037878#abs:4, info:pmid/12814189#abs:8, info:pmid/23145312#abs:7, info:pmid/15707585#abs:7, info:pmid/21142150#abs:1, info:pmid/15371459#abs:2, info:pmid/10454737#abs:2, info:pmid/17106256#abs:2, info:pmid/10479655#body:203, info:pmid/19129184#body:301 <more data available...> | 2 | 46  | Ovary {Organ urn: agi-ncimorgan: CL384202}, Bladder {Organ urn: agi-ncimorgan: C1281573}, Lung {Organ urn: agi-ncimorgan: C1278908}, Endometrium {Organ urn: agi-ncimorgan: C1550633}, Dermis {Organ urn: agi-ncimorgan: C0011646}, Eye {Organ urn: agi-ncimorgan: C1550636}, Renal Tubule {Organ urn: agi-ncimorgan: CL355448}                                 |
| CLDN7 --> cell invasion  | Regulation | We demonstrate that knockdown of claudin-7 leads to reduced E-cadherin expression, impairment of homotypic adhesion, and increased cell invasion. Knockdown of claudin-7 expression in esophageal squamous cell carcinoma cells induces loss of E-cadherin, along with increased cell growth and enhanced cell invasion [84].                                                                                                                                                                                                                                                                                                                   | info:pmid/17255337#body:23, info:pmid/24009024#cont:393                                                                                                                                                                                                                                           | 2 | 2   | Esophagus {Organ urn: agi-ncimorgan: C1278919}, Ovary {Organ urn: agi-ncimorgan: CL384202}                                                                                                                                                                                                                                                                      |
| CASP4 --> apoptosis      | Regulation | Overexpression of ICH-2 in insect cells induces apoptosis. Caspase-11 plays a crucial role in both inflammation and apoptosis. Inhibition of JNK, caspase-4, or caspase-8 activation diminished edelfosine-induced apoptosis. Furthermore, we show that caspase-11-mediated apoptosis under septic condition is Bid-independent. Furthermore, CHOP siRNA or inhibition of caspase-4 activity attenuated withaferin A-induced apoptosis. Furthermore, the inhibition of caspase-4 activity by z-LEVD-fmk significantly reduced resveratrol-induced apoptosis. <more data available...>                                                           | info:pmid/7797510#abs:4, info:pmid/11684090#abs:1, info:pmid/17974980#abs:7, info:pmid/12232800#abs:5, info:pmid/21266191#abs:8, info:pmid/17914584#abs:5, info:pmid/17854271#abs:7, info:pmid/16465268#abs:5, info:pmid/24178758#abs:7, info:pmid/24394318#abs:11 <more data available...>       | 2 | 100 | Gastrula {Organ urn: agi-ncimorgan: C0017199}, Synovial Membrane {Organ urn: agi-ncimorgan: C0039099}, Retina {Organ urn: agi-ncimorgan: C1962966}, Dental Pulp {Organ urn: agi-ncimorgan: C0011399}, Kidney {Organ urn: agi-ncimorgan: C1278978}, retinal pigment epithelium {Organ urn: agi-ncimorgan: C0035322}, airway {Organ urn: agi-ncimorgan: C0458827} |

|                        |            |                                                                                                                                                                                                                                                                                                                                                                                                                                                                                                                                                                                                                                                                                                       |                                                                                                                                                                                                                                                                                                              |   |     |                                                                                                                                                                                                                                                                                                                                                                                                                                                                                                                                     |
|------------------------|------------|-------------------------------------------------------------------------------------------------------------------------------------------------------------------------------------------------------------------------------------------------------------------------------------------------------------------------------------------------------------------------------------------------------------------------------------------------------------------------------------------------------------------------------------------------------------------------------------------------------------------------------------------------------------------------------------------------------|--------------------------------------------------------------------------------------------------------------------------------------------------------------------------------------------------------------------------------------------------------------------------------------------------------------|---|-----|-------------------------------------------------------------------------------------------------------------------------------------------------------------------------------------------------------------------------------------------------------------------------------------------------------------------------------------------------------------------------------------------------------------------------------------------------------------------------------------------------------------------------------------|
| THBS1 --> apoptosis    | Regulation | At day 5, TSP-1 also induced promyelocytic leukemia cell apoptosis. Growth of the cells on a fibronectin substrate also suppressed induction of apoptosis by TSP1 or the peptides., TSP-1-mediated apoptosis was consistently associated with the up-regulation of active Caspase-3., Thrombospondin-1 (TSP-1) is a multifunctional protein known to modulate angiogenesis, endothelial cell adhesion and apoptosis., Knockdown of TSP-1, through RNA interference, resulted in overexpression of VEGF and reduced cytokine-induced apoptosis. <more data available...>                                                                                                                               | info:pmid/15868907#abs:5, info:pmid/9135017#abs:9, info:pmid/14612980#abs:5, info:pmid/12128069#abs:1, info:pmid/17154366#abs:7, info:pmid/16406676#abs:4, info:pmid/20080874#abs:10, info:pmid/8696941#abs:3, info:pmid/16962673#abs:5, info:pmid/18539706#abs:6 <more data available...>                   | 2 | 100 | Ovary {Organ urn: agi-ncimorgan: CL384202}, Blood capillaries {Organ urn: agi-ncimorgan: C0006901}, Ovarian Follicle {Organ urn: agi-ncimorgan: C1283799}, Dermis {Organ urn: agi-ncimorgan: C0011646}, Microvessels {Organ urn: agi-ncimorgan: C2350570}, Intestines {Organ urn: agi-ncimorgan: C0021853}, Urinary tract {Organ urn: agi-ncimorgan: C0042027}, Brain {Organ urn: agi-ncimorgan: C1269537}, Blood Vessels {Organ urn: agi-ncimorgan: C0005847}, Heart {Organ urn: agi-ncimorgan: C1281570} <more data available...> |
| ST14 --> cell invasion | Regulation | Overexpression of bikunin significantly reduced the gene expression of matrilysin, which attenuated <i>in vitro</i> cell invasion in the PC-3 cells., Suppression of matrilysin expression by small hairpin RNA knockdown in ErbB-2-overexpressing LNCaP cells dramatically suppressed cancer cell invasion., Two other members of the TTSP family, matrilysin and hepsin, are over-expressed in prostate adenocarcinoma and mechanistically influence cancer cell invasion and metastasis., Matrilysin inhibition reduced cancer cell invasion in matrigels. <more data available...>                                                                                                                | info:pmid/18649735#abs:6, info:pmid/20971737#abs:9, info:pmid/18338334#abs:2, info:pmid/23044656#cont:50, info:pmid/12571229#body:294, info:pmid/23466486#cont:217, info:pmid/20652801#cont:186, info:pmid/19853659#body:20, info:doi/10.2353/ajpath.2010.100228#body:214                                    | 2 | 9   | Aorta {Organ urn: agi-ncimorgan: C1278934}, Prostate {Organ urn: agi-ncimorgan: C1278980}                                                                                                                                                                                                                                                                                                                                                                                                                                           |
| FLT1 --> apoptosis     | Regulation | Transfection of the sflt-1 gene also attenuated pulmonary fibrosis and apoptosis at 14 days., Knocking down expression of VEGFR1 and inhibiting activation of NFkappaB and JNK also blocked lysophosphatidic acid induced protection against apoptosis., In addition, intra-amniotic sFlt-1 treatment suppressed activation of lung VEGF receptor-2 and increased apoptosis in endothelial and mesenchymal cells in the newborn lung., In turn, FLT-1 neutralization affects leukemia localization (now in the bone marrow diaphysis), increases leukemia apoptosis, and impedes the exit of acute lymphoblastic leukemia cells, prolonging the survival of inoculated mice. <more data available...> | info:pmid/16002726#abs:6, info:pmid/18396013#abs:9, info:pmid/22003089#abs:7, info:pmid/16249383#abs:5, info:pmid/19608702#body:116, info:pmid/22796052#body:235, info:pmid/22503073#body:105, info:pmid/21225468#cont:273, info:pmid/14521839#body:39, info:pmid/23975597#cont:327 <more data available...> | 2 | 31  | amnion {Organ urn: agi-ncimorgan: C0002630}, Diaphragm {Organ urn: agi-ncimorgan: C0242696}, Alveolus {Organ urn: agi-ncimorgan: C1515933}, Lung {Organ urn: agi-ncimorgan: C1278908}, Aorta {Organ urn: agi-ncimorgan: C1278934}, nucleus pulposus {Organ urn: agi-ncimorgan: C1185714}, Left ventricular {Organ urn: agi-ncimorgan: C0225897}, Liver {Organ urn: agi-ncimorgan: CL384198}                                                                                                                                         |

|                                                          |                   |                                                                                                                                                                                                                                                                                                                                                                                                                                                                                                                                                                                                                                                                         |                                                                                                                                                                                                                                                                                                                                                               |          |           |                                                                                                                                                                                                                                                                                                                                                                                                                                     |
|----------------------------------------------------------|-------------------|-------------------------------------------------------------------------------------------------------------------------------------------------------------------------------------------------------------------------------------------------------------------------------------------------------------------------------------------------------------------------------------------------------------------------------------------------------------------------------------------------------------------------------------------------------------------------------------------------------------------------------------------------------------------------|---------------------------------------------------------------------------------------------------------------------------------------------------------------------------------------------------------------------------------------------------------------------------------------------------------------------------------------------------------------|----------|-----------|-------------------------------------------------------------------------------------------------------------------------------------------------------------------------------------------------------------------------------------------------------------------------------------------------------------------------------------------------------------------------------------------------------------------------------------|
| <p>FLT1 ---&gt; epithelial to mesenchymal transition</p> | <p>Regulation</p> | <p>This effect is reversed with exogenous recombinant mouse VEGF-A165, whereas addition of soluble VEGF receptor-1 blocks epithelial-mesenchymal transformation., VEGFR-1 on tumor cells may contribute to the aggressive behavior of hepatocellular carcinoma cells by inducing epithelial to mesenchymal transition., VEGFR-1 was reported to have a function in eliciting epithelial-to-mesenchymal transition in cancer cells toward invasive and metastatic phenotype., These data suggest that VEGFR-1 may be involved in the regulation of Epithelial-mesenchymal transition. &lt;more data available...&gt;</p>                                                 | <p>info:pmid/12591918#abs:4,<br/>info:pmid/21345006#abs:8,<br/>info:pmid/19689271#abs:4,<br/>info:pmid/23776453#cont:464,<br/>info:pmid/21336677#cont:321,<br/>info:pmid/16397214#title:1,<br/>info:pmid/22912411#cont:523,<br/>info:pmid/23384563#body:221,<br/>info:pmid/22579961#body:167,<br/>info:doi/10.1016/j.amjsurg.2007.05.007#body:87</p>          | <p>2</p> | <p>10</p> | <p>Endocardium {Organ urn:agi-ncimorgan: C1550632},<br/>Blood Vessels {Organ urn:agi-ncimorgan: C0005847}</p>                                                                                                                                                                                                                                                                                                                       |
| <p>PDGFRA --&gt; cell migration</p>                      | <p>Regulation</p> | <p>The PDGF alpha-receptor also mediates a mitogenic signal, but fails to induce cell migration in certain cell types., Activation of the platelet-derived growth factor alpha receptor (alphaPDGFR) leads to cell migration and DNA synthesis, According to our data, mole ovotestes result from a process of PDGFRalpha-mediated mesonephric cell migration, which occurs simultaneously in both sexes., PDGFRA, a receptor whose activity is required for cell migration through the primitive streak, is a target of miR-130b and -218 <i>in vivo</i>. &lt;more data available...&gt;</p>                                                                           | <p>info:pmid/8617789#abs:2,<br/>info:pmid/10497192#abs:1,<br/>info:pmid/19382159#abs:8,<br/>info:pmid/22995917#abs:8,<br/>info:pmid/22070644#abs:6,<br/>info:pmid/21996738#cont:434,<br/>info:pmid/22080864#cont:55,<br/>info:pmid/12176024#body:111,<br/>info:pmid/21331762#cont:154,<br/>info:pmid/12651897#body:152<br/>&lt;more data available...&gt;</p> | <p>2</p> | <p>21</p> | <p>Primitive Streak {Organ urn:agi-ncimorgan: C0033153},<br/>Gonadal {Organ urn:agi-ncimorgan: C0018067},<br/>Spinal Cord {Organ urn:agi-ncimorgan: CL366046},<br/>Neural Crest {Organ urn:agi-ncimorgan: C0027789},<br/>Epicardium {Organ urn:agi-ncimorgan: C0225968},<br/>Mesenchyme {Organ urn:agi-ncimorgan: C0162415},<br/>Mesonephric {Organ urn:agi-ncimorgan: C0025492},<br/>Brain {Organ urn:agi-ncimorgan: C1269537}</p> |
| <p>EGLN3 --&gt; apoptosis</p>                            | <p>Regulation</p> | <p>EGLN3 also has pro-apoptotic activity in some cell types., PHD3 may be an important regulator of apoptosis and it is mainly found in tumors with good prognosis., EglN2 and EglN3 also appear to play Hypoxia-inducible factor-independent roles in regulating cell proliferation and apoptosis, respectively., One isoform, PHD3, is expressed in response to hypoxia and causes apoptosis in oxygenated conditions in neural cells., Finally, NFI loss is highlighted as a valuable study model to investigate the cell lineage selectivity of the EglN3-mediated developmental apoptotic defect of chromaffin precursor cells. &lt;more data available...&gt;</p> | <p>info:pmid/19737309#abs:2,<br/>info:pmid/21877141#abs:11,<br/>info:pmid/22089927#abs:6,<br/>info:pmid/18337469#abs:2,<br/>info:pmid/19391076#abs:7,<br/>info:pmid/20973793#abs:6,<br/>info:pmid/20849813#abs:6,<br/>info:pmid/22898032#abs:5,<br/>info:pmid/19691672#abs:9,<br/>info:pmid/20978507#cont:587<br/>&lt;more data available...&gt;</p>          | <p>2</p> | <p>45</p> | <p>Neural Crest {Organ urn:agi-ncimorgan: C0027789},<br/>Heart {Organ urn:agi-ncimorgan: C1281570},<br/>Nervous system {Organ urn:agi-ncimorgan: C0027763},<br/>Nerve {Organ urn:agi-ncimorgan: C1280541},<br/>Breast {Organ urn:agi-ncimorgan: C0006141},<br/>superior cervical ganglion {Organ urn:agi-ncimorgan: C1281048}</p>                                                                                                   |

|                         |            |                                                                                                                                                                                                                                                                                                                                                                                                                                                                                                                                                                                                                                                                                           |                    |                                                                                                                                                                                                                                                                                                                                                                                                                                                                                                                                         |
|-------------------------|------------|-------------------------------------------------------------------------------------------------------------------------------------------------------------------------------------------------------------------------------------------------------------------------------------------------------------------------------------------------------------------------------------------------------------------------------------------------------------------------------------------------------------------------------------------------------------------------------------------------------------------------------------------------------------------------------------------|--------------------|-----------------------------------------------------------------------------------------------------------------------------------------------------------------------------------------------------------------------------------------------------------------------------------------------------------------------------------------------------------------------------------------------------------------------------------------------------------------------------------------------------------------------------------------|
| PDGFRA ---> apoptosis   | Regulation | <p>Thus, our findings show that PDGFRalpha signaling through PLCgamma and phosphatidylinositol 3-kinase has a protective role in preventing apoptosis in early development. Pdgfra is expressed in the mesenchyme of multiple organs during embryonic development and Pdgfralpha is involved in cell proliferation, differentiation, migration, and apoptosis in many tissues., Although PDGFR-A inhibition by this agent resulted in reduced mouse tumor cell growth and increased apoptosis <i>in vitro</i>, and reduced tumor cell proliferation <i>in vivo</i>, vandutinib did reduce tumor volume at the doses tested (360 mg/kg) <i>in vivo</i>. &lt;more data available...&gt;</p> | <p>2</p> <p>19</p> | <p>Mesoderm {Organ urn: agi-ncimorgan: C0025485}, Mesenchyme {Organ urn: agi-ncimorgan: C0162415}, Lung {Organ urn: agi-ncimorgan: C1278908}, Fetus {Organ urn: agi-ncimorgan: C1305737}, Liver {Organ urn: agi-ncimorgan: CL384198}, Brain {Organ urn: agi-ncimorgan: C1269537}, Gastrointestinal tract {Organ urn: agi-ncimorgan: C0017189}</p>                                                                                                                                                                                       |
| LCN2 --+> apoptosis     | Regulation | <p>Our results also revealed that NGAL protect cells from apoptosis, It has been shown that over-activation of NGAL induces apoptosis., Thus 24p3 is an MK886-inducible gene and may play an important role in MK886-induced apoptosis., This study provides evidence that overexpression of 24p3 gene can induce apoptosis of mammary epithelial cells., Although previous publications have suggested that 24p3 has pro-apoptotic functions, other data are more suggestive of a survival function., In addition, our experiments with caspase inhibitors LEHD-FMK and IETD-FMK prevent LCN2-induced apoptosis. &lt;more data available...&gt;</p>                                      | <p>2</p> <p>88</p> | <p>Fetus {Organ urn: agi-ncimorgan: C1305737}, Sebaceous Glands {Organ urn: agi-ncimorgan: C0036505}, Renal Tubule {Organ urn: agi-ncimorgan: CL355448}, Mammary Gland {Organ urn: agi-ncimorgan: C0929301}, Uterus {Organ urn: agi-ncimorgan: C1269032}, Pancreas {Organ urn: agi-ncimorgan: C1278931}, Brain {Organ urn: agi-ncimorgan: C1269537}, Bone Marrow {Organ urn: agi-ncimorgan: C0005953}, Hippocampus {Organ urn: agi-ncimorgan: C0019564}, Kidney {Organ urn: agi-ncimorgan: C0022663} &lt;more data available...&gt;</p> |
| DNASE1L3 --+> apoptosis | Regulation | <p>Furthermore, DNase gamma is suggested to be involved in naturally occurring apoptosis in developing nervous systems., These findings suggest that DNase gamma plays an important role in Fas-independent apoptotic DNA fragmentation in hepatocytes., However, overexpression of DNaseY alone neither triggered apoptosis nor facilitated cell death in response to VM26 or serum deprivation., These results demonstrate that DNase-gamma gene transfer can induce apoptosis in human glioma cells, indicating its potential to become a future gene therapy strategy. &lt;more data available...&gt;</p>                                                                             | <p>2</p> <p>17</p> | <p>Nervous system {Organ urn: agi-ncimorgan: C0027763}, Liver {Organ urn: agi-ncimorgan: CL384198}, Skin {Organ urn: agi-ncimorgan: C0684084}</p>                                                                                                                                                                                                                                                                                                                                                                                       |

|                                               |            |                                                                                                                                                                                                                                                                                                                                                                                                                                                                                                                                                                                                                                                                                        |                                                                                                                                                                                                                                                                                             |   |    |                                                                                                                                                                                                                                                                                                                                                   |
|-----------------------------------------------|------------|----------------------------------------------------------------------------------------------------------------------------------------------------------------------------------------------------------------------------------------------------------------------------------------------------------------------------------------------------------------------------------------------------------------------------------------------------------------------------------------------------------------------------------------------------------------------------------------------------------------------------------------------------------------------------------------|---------------------------------------------------------------------------------------------------------------------------------------------------------------------------------------------------------------------------------------------------------------------------------------------|---|----|---------------------------------------------------------------------------------------------------------------------------------------------------------------------------------------------------------------------------------------------------------------------------------------------------------------------------------------------------|
| CASP4 --> cell migration                      | Regulation | Here, we show that caspase-11, a mammalian pro-inflammatory caspase, regulates cell migration during inflammation. Caspase-3 and caspase-11 may promote cell migration [27], [28]. Recently, it has been shown that caspase-11 has non-pathological function of regulating cell migration. Caspase-11 plays diverse roles in apoptosis, inflammation, and cell migration. Caspase-11 regulates cell migration by promoting Aip1-Cofilin-mediated actin depolymerization. Unlike caspase 1, caspase 11 mediates the lipopolysaccharide neurotoxicity [26] and regulates cell migration [27]. <more data available...>                                                                   | info:pmid/17293856#abs:3, info:pmid/19675677#body:318, info:pmid/21530491#body:109, info:pmid/18474237#body:15, info:pmid/18309324#body:231, info:pmid/24037645#cont:60, info:pmid/22582393#cont:316, info:pmid/18411310#body:280, info:pmid/18332114#body:255                              | 2 | 9  | Ground substance {Organ urn: agi-ncimorgan: C1383501}, Bladder {Organ urn: agi-ncimorgan: C1281573}, Aorta {Organ urn: agi-ncimorgan: C1278934}, Salivary Glands {Organ urn: agi-ncimorgan: C0036098}, Skin {Organ urn: agi-ncimorgan: C0684084}, Blood Vessels {Organ urn: agi-ncimorgan: C0005847}, Dermis {Organ urn: agi-ncimorgan: C0011646} |
| THBS1 --> cell invasion                       | Regulation | TSP-1 up-regulated KB tumor cell invasion 5-fold. Stromal TSP-1 may play a role in regulating tumor cell invasion. Tumor cell invasion was upregulated 3.5 to 4.5-fold by TSP-1 and TGF-beta 1, respectively. Antibodies against uPA or uPAR neutralized the TSP-1- and TGF-beta 1-promoted breast tumor cell invasion. TSP-1 promotes tumor cell invasion of collagen by breast cancer cells. HGF stimulation of cell invasion and enhancement of MMP-9 expression were partially suppressed by TSP-1 overexpression. We previously showed that thrombospondin 1 (TSP-1) upregulates the plasminogen/plasmin system and promotes breast tumor cell invasion. <more data available...> | info:pmid/15172186#abs:9, info:pmid/12219015#abs:2, info:pmid/9695745#abs:9, info:pmid/9288157#abs:9, info:pmid/8661169#abs:12, info:pmid/19959938#abs:4, info:pmid/10090848#abs:1, info:pmid/19634159#abs:13, info:pmid/18661355#abs:4, info:pmid/10917542#abs:9 <more data available...>  | 2 | 41 |                                                                                                                                                                                                                                                                                                                                                   |
| NQO1 --> apoptosis                            | Regulation | Mammalian NAD(P)H:quinone oxidoreductases such as human NQO1 act as inducers of apoptosis. NAD(P)H:quinoneoxidoreductase 1 (NQO1) inhibits some cancers and increases p53 and apoptosis in cells. NQO1 participates in cellular defense against oxidative stress and regulates apoptosis via p53- and NF?B-mediated pathways. NQO1 activity, therefore, is a key determinant of beta-Lapachone-mediated apoptosis and cytotoxicity in prostate cancer cells. beta-Lapachone, an o-naphthoquinone, induces a novel caspase- and p53-independent apoptotic pathway dependent on NAD(P)H:quinone oxidoreductase 1 (NQO1). <more data available...>                                        | info:pmid/19709309#abs:1, info:pmid/18676018#abs:1, info:pmid/21706157#abs:1, info:pmid/11412042#abs:9, info:pmid/15837761#abs:1, info:pmid/21947872#abs:7, info:pmid/22687461#abs:8, info:pmid/23831944#abs:7, info:pmid/24189322#abs:7, info:pmid/11279125#abs:1 <more data available...> | 2 | 45 | Kidney {Organ urn: agi-ncimorgan: C1278978}, Breast {Organ urn: agi-ncimorgan: C0006141}, Colon {Organ urn: agi-ncimorgan: C1281569}, Bone Marrow {Organ urn: agi-ncimorgan: C0005953}, Skin {Organ urn: agi-ncimorgan: C0684084}, Brain {Organ urn: agi-ncimorgan: C1269537}                                                                     |
| ST14 --> epithelial to mesenchymal transition | Regulation | These results suggest that epithin is a key mediator of TGF-beta-induced epithelial-mesenchymal transition in tumor progression. suppressor of tumorigenicity 14 has also been reported to inhibit ZEB2-driven epithelial to mesenchymal transition.                                                                                                                                                                                                                                                                                                                                                                                                                                   | info:pmid/20398629#abs:8, info:pmid/20980099#body:199                                                                                                                                                                                                                                       | 2 | 2  | Mesenchyme {Organ urn: agi-ncimorgan: C0162415}                                                                                                                                                                                                                                                                                                   |

|                                   |                   |                                                                                                                                                                                                                                                                                                                                                                                                                                                                                                                                                                                                                                                                                                                        |                                                                                                                                                                                                                                                                                                                                               |          |           |                                                                                                                                                                                                                                                                                                                                                                                                                                                                                                    |
|-----------------------------------|-------------------|------------------------------------------------------------------------------------------------------------------------------------------------------------------------------------------------------------------------------------------------------------------------------------------------------------------------------------------------------------------------------------------------------------------------------------------------------------------------------------------------------------------------------------------------------------------------------------------------------------------------------------------------------------------------------------------------------------------------|-----------------------------------------------------------------------------------------------------------------------------------------------------------------------------------------------------------------------------------------------------------------------------------------------------------------------------------------------|----------|-----------|----------------------------------------------------------------------------------------------------------------------------------------------------------------------------------------------------------------------------------------------------------------------------------------------------------------------------------------------------------------------------------------------------------------------------------------------------------------------------------------------------|
| <p>FLT1 --&gt; cell migration</p> | <p>Regulation</p> | <p>Blockade of a VEGFR-1 autocrine loop with PTK787/ZK222584 inhibited tumor cell migration. VEGFR-1/Flt-1, a VEGF receptor that regulates cell migration and blood vessel formation, was also down-regulated in Ahr-/- cells. We demonstrate further that FLT-1-induced cell migration involves actin polymerization and lipid raft formation. Further, VEGF stimulation resulted in enhanced cellular migration, which was effectively blocked by pharmacologic inhibition of VEGFR-1 or Src kinase. Our laboratory has shown that vascular endothelial growth factor receptor-1 (VEGFR-1) expression on human pancreatic cancer cell lines mediates cell migration and invasion. &lt;more data available...&gt;</p> | <p>info:pmid/18316624#abs:8, info:pmid/15946950#abs:7, info:pmid/16249383#abs:6, info:pmid/16685275#abs:5, info:pmid/16397214#abs:1, info:pmid/9924144#abs:5, info:pmid/17420287#abs:11, info:pmid/15107818#abs:3, info:pmid/21345805#abs:3, info:pmid/21752276#abs:5 &lt;more data available...&gt;</p>                                      | <p>2</p> | <p>56</p> | <p>Lymphatic System {Organ um: agi-ncimorgan: C0024235}, Diaphyses {Organ um: agi-ncimorgan: C0242696}, Colon {Organ um: agi-ncimorgan: C1281569}, Heart {Organ um: agi-ncimorgan: C1281570}, Blood Vessels {Organ um: agi-ncimorgan: C0005847}, Prostate {Organ um: agi-ncimorgan: C1278980}, Endometrium {Organ um: agi-ncimorgan: C1550633}, Bone Marrow {Organ um: agi-ncimorgan: C0005953}, Retina {Organ um: agi-ncimorgan: C1962966}, Mammary Gland {Organ um: agi-ncimorgan: C0929301}</p> |
| <p>ST14 --&gt; cell migration</p> | <p>Regulation</p> | <p>The serine protease MT-SP1/matriptase plays an important role in cell migration and matrix degradation. Furthermore, TGF-beta-induced cell migration and invasion were significantly impaired by epithin knockdown. These data suggest that matriptase might be a central regulator of cell migration and cancer invasion. These studies demonstrated that matriptase, likely its protease activity, is critical for neural progenitor cell migration. These results further support our working hypothesis that matriptase is an upstream regulator of cellular migration and extracellular matrix degradation. &lt;more data available...&gt;</p>                                                                 | <p>info:pmid/17255532#abs:1, info:pmid/20398629#abs:6, info:pmid/11864986#body:284, info:pmid/21149451#cont:296, info:pmid/10962009#body:216, info:pmid/12571229#body:289, info:pmid/11567025#body:63</p>                                                                                                                                     | <p>2</p> | <p>7</p>  | <p>Mesenchyme {Organ um: agi-ncimorgan: C0162415}</p>                                                                                                                                                                                                                                                                                                                                                                                                                                              |
| <p>PAX8 --- apoptosis</p>         | <p>Regulation</p> | <p>Suppression of PAX8 selectively induces apoptotic cell death of ovarian cancer cells. The Pax-8 gene may play a crucial role in heart development and regulating cardiocyte apoptosis. The anti-apoptotic b cell lymphoma 2 (BCL2) gene is associated with treatment resistance, and is inactivated by the paired box transcription factor 8 (PAX8). Remarkably, tp53inp1 silencing significantly abolishes Pax8-induced apoptosis thus suggesting that tp53inp1 may be the mediator of the observed effects. Furthermore, the inactivation of Pax8 in adult mouse thyroid induces apoptosis of TCF and reveals a significant up-regulation of genes involved in ... &lt;more data available...&gt;</p>             | <p>info:pmid/21746896#abs:9, info:pmid/20851479#abs:10, info:pmid/24602166#abs:2, info:pmid/23868062#abs:6, info:pmid/21693675#cont:193, info:pmid/16179407#body:242, info:pmid/16352687#body:243, info:pmid/21924257#body:165, info:pmid/21966443#cont:133, info:doi/10.1016/j.ijcard.2009.09.262#body:12 &lt;more data available...&gt;</p> | <p>2</p> | <p>13</p> | <p>achilles tendon {Organ um: agi-ncimorgan: C0001074}, female reproductive system {Organ um: agi-ncimorgan: C0700038}, Kidney {Organ um: agi-ncimorgan: C1278978}</p>                                                                                                                                                                                                                                                                                                                             |

|                                                  |            |                                                                                                                                                                                                                                                                                                                                                                                                                                                                                                                                                                                                                                                                                                                                 |                                                                                                                                                                                                                                                                                                                                                |   |    |                                                                                                                                                                                                                                                                                                            |
|--------------------------------------------------|------------|---------------------------------------------------------------------------------------------------------------------------------------------------------------------------------------------------------------------------------------------------------------------------------------------------------------------------------------------------------------------------------------------------------------------------------------------------------------------------------------------------------------------------------------------------------------------------------------------------------------------------------------------------------------------------------------------------------------------------------|------------------------------------------------------------------------------------------------------------------------------------------------------------------------------------------------------------------------------------------------------------------------------------------------------------------------------------------------|---|----|------------------------------------------------------------------------------------------------------------------------------------------------------------------------------------------------------------------------------------------------------------------------------------------------------------|
| TGFBR3 ---  epithelial to mesenchymal transition | Regulation | The TGF-beta superfamily coreceptor, the type III TGF-beta receptor (BetaRIII or betaglycan), is required for epithelial to mesenchymal transition during embryonic heart development and palate fusion., Beta-glycan is also required for the epithelial-mesenchymal transition of cardiac endothelial cells which leads to heart valve formation., Further, misexpression of TBRIII in the ventricle and addition of TGFβ2 results in epithelial-mesenchymal transformation in non-transforming ventricular endocardial cells ( ). <more data available...>                                                                                                                                                                   | info:pmid/1799987#abs:3,<br>info:pmid/1467294#body:78,<br>info:pmid/1576675#body:163,<br>info:pmid/21550381#body:195,<br>info:pmid/22521265#body:195,<br>info:pmid/20299672#body:183                                                                                                                                                           | 2 | 6  | Mesenchyme {Organ urn: agi-ncimorgan: C0162415}, Heart {Organ urn: agi-ncimorgan: C1281570}, Heart Ventricle {Organ urn: agi-ncimorgan: C0018827}, Epicardium {Organ urn: agi-ncimorgan: C0225968}                                                                                                         |
| CLDN7 ---  cell migration                        | Regulation | Taken together, our study demonstrates that claudin-7 inhibits cell migration and invasion through ERK/MAPK signaling pathway in response to growth factor stimulation in human lung cancer cells., Furthermore, claudin-6, 7, and 9 enhance gastric adenocarcinoma cell migration and invasion., Our microarray analysis provides several possible mechanisms by which claudin-7 can affect cell migration and invasion, and these different mechanisms are currently being investigated., Claudin-7 overexpression inhibits cell migration and invasion in NCI-H1299, a human non-small cell lung cancer cell line that lacks endogenous claudin-7 expression.                                                                | info:pmid/21641901#abs:11,<br>info:pmid/23391410#body:140,<br>info:pmid/21789222#cont:200,<br>info:pmid/22546605#body:22                                                                                                                                                                                                                       | 2 | 4  | Foot {Organ urn: agi-ncimorgan: C2348704}                                                                                                                                                                                                                                                                  |
| WNT4 ---  cell migration                         | Regulation | Lack of Wnt4 gives rise to masculinization of the XX gonad and we showed previously that the role of WNT4 was to inhibit endothelial and steroidogenic cell migration into the developing ovary. We show that WNT4 represses mesonephric endothelial and steroidogenic cell migration in the XX gonad, preventing the formation of a male-specific coelomic blood vessel and the production of steroids., Finally, some cells that are positive for Cyp21, which is normally expressed only in the adrenal gland, are found in the gonads of Wnt-4-deficient embryos, indicating that Wnt-4 may play a role in cell migration or in the sorting of adrenal and gonadal cells during early development. <more data available...> | info:pmid/15581876#abs:3,<br>info:pmid/12835383#abs:7,<br>info:pmid/12399432#abs:5,<br>info:pmid/15620545#body:161,<br>info:pmid/19419993#body:206,<br>info:pmid/21115154#body:52,<br>info:pmid/23027131#cont:430,<br>info:pmid/22682531#cont:14,<br>info:pmid/21397195#body:34,<br>info:pmid/15589122#body:9<br><more data available...>      | 2 | 14 | Gonadal {Organ urn: agi-ncimorgan: C0018067}, Mesonephric {Organ urn: agi-ncimorgan: C0025492}, Adrenal Glands {Organ urn: agi-ncimorgan: C0001625}, Vascular system {Organ urn: agi-ncimorgan: C0489903}, Testis {Organ urn: agi-ncimorgan: C1278981}, Blood Vessels {Organ urn: agi-ncimorgan: C0005847} |
| FLT1 ---> cell invasion                          | Regulation | Cancer-associated fibroblast-induced tumor cell invasion was abrogated by VEGF neutralization or Flt1 knockdown in tumor cells., Given our previous finding of VEGFR-1-mediated tumor cell invasion and migration in pancreatic carcinoma cells, we hypothesize that VEGFR-1 plays a role in tumor progression in pancreatic cancer through the induction of epithelial to mesenchymal transition., Furthermore, we found that VEGFR-1 knockdown inhibits tumor cell invasion and metastasis., A novel intracellular isoform of VEGFR-1 activates Src and promotes cell invasion in MDA-MB-231 breast cancer cells. <more data available...>                                                                                    | info:pmid/21115742#abs:7,<br>info:pmid/16397214#abs:9,<br>info:pmid/21989163#cont:98,<br>info:pmid/20512933#title:1,<br>info:pmid/17145519#body:114,<br>info:pmid/23341879#cont:38,<br>info:pmid/23276825#body:421,<br>info:pmid/23384563#body:179,<br>info:pmid/18508995#body:285,<br>info:pmid/20407463#body:240<br><more data available...> | 2 | 12 | Mesenchyme {Organ urn: agi-ncimorgan: C0162415}, perirenal fascia {Organ urn: agi-ncimorgan: C0227637}, Epicardium {Organ urn: agi-ncimorgan: C0225968}, Blood Vessels {Organ urn: agi-ncimorgan: C0005847}                                                                                                |

|                                               |            |                                                                                                                                                                                                                                                                                                                                                                                                                                                                                                                                                                                                                                                                    |                                                                                                                                                                                                                                                                                                                                                                          |   |    |                                                                                                                                                                                                                                                                                                                    |
|-----------------------------------------------|------------|--------------------------------------------------------------------------------------------------------------------------------------------------------------------------------------------------------------------------------------------------------------------------------------------------------------------------------------------------------------------------------------------------------------------------------------------------------------------------------------------------------------------------------------------------------------------------------------------------------------------------------------------------------------------|--------------------------------------------------------------------------------------------------------------------------------------------------------------------------------------------------------------------------------------------------------------------------------------------------------------------------------------------------------------------------|---|----|--------------------------------------------------------------------------------------------------------------------------------------------------------------------------------------------------------------------------------------------------------------------------------------------------------------------|
| CCRL2 --> cell migration                      | Regulation | <p>Taken together, these results suggest for the first time that elevated CCRL2 in glioma promotes cell migration and invasion., Accordingly, most, but not all studies, describe a lack of CCRL2-mediated Ca<sup>2+</sup>-flux and cell migration., Thus, because CCR2 is the only known high-affinity receptor for MCP-1, the chemokine receptor2-MCP-1 axis may influence both phases of Langerhans cell migration., In addition to being cleared by CCX-CKR, CCL19 is also scavenged by expressed on B cells in a maturation stage-dependent manner, and modulates T- and B-lymphocytes and dendritic cell trafficking [ ]. &lt;more data available...&gt;</p> | <p>info:pmid/23142225#abs:7,<br/>info:pmid/21272574#body:227,<br/>info:pmid/10899907#body:353,<br/>info:pmid/24063739#body:26,<br/>info:doi/10.1016/j.<br/>ddtec.2012.03.005#body:26</p>                                                                                                                                                                                 | 2 | 5  | <p>Endometrium {Organ urn:<br/>agi-ncimorgan: C1550633},<br/>Mesenchyme {Organ urn:<br/>agi-ncimorgan: C0162415},<br/>Breast {Organ urn:<br/>agi-ncimorgan: C0006141},<br/>Colon {Organ urn:<br/>agi-ncimorgan: C1281569},<br/>Nephrons {Organ urn:<br/>agi-ncimorgan: C0027713}</p>                               |
| LCN2 --> epithelial to mesenchymal transition | Regulation | <p>The present study aimed at determining the effect of Betulinic acid on NGAL-induced epithelial-to-mesenchymal transition., Estrogen receptor alpha may participate in the pathway that leads to Lcn2-induced epithelial to mesenchymal transition., Lcn2 knockdown also indicated that LCN2 promotes epithelial-mesenchymal transition and migration of endometrial epithelial cells., Overexpression of ERalpha in Lcn2-expressing cells reversed the epithelial to mesenchymal transition and reduced Slug expression, suggesting that ERalpha negatively regulates Lcn2-induced epithelial to mesenchymal transition. &lt;more data available...&gt;</p>     | <p>info:pmid/23399635#abs:3,<br/>info:pmid/19571677#abs:4,<br/>info:pmid/24194573#abs:8,<br/>info:pmid/19237579#abs:7,<br/>info:pmid/23696034#abs:5,<br/>info:pmid/22075378#body:85,<br/>info:pmid/21874256#cont:26,<br/>info:pmid/23300839#cont:37,<br/>info:pmid/22592335#cont:8,<br/>info:pmid/22982376#cont:137<br/>&lt;more data available...&gt;</p>               | 2 | 18 | <p>Mesenchyme {Organ urn:<br/>agi-ncimorgan: C0162415},<br/>Central Nervous System {Organ urn: agi-ncimorgan: C0927232}, Endometrium {Organ urn: agi-ncimorgan: C1550633}, Liver {Organ urn: agi-ncimorgan: CL384198}, Brain {Organ urn: agi-ncimorgan: C1269537}, Breast {Organ urn: agi-ncimorgan: C0006141}</p> |
| LCN2 --> cell migration                       | Regulation | <p>The cell migration-promoting activity of LCN2 in the CNS was verified <i>in vivo</i> using mouse models., In contrast, Lcn2 silencing in aggressive breast cancer cells inhibited cell migration and the mesenchymal phenotype., We conclude that Lcn-2 triggered cytokine secretions to prevent RL95-2 cells from undergoing apoptosis and subsequently increased cell migration., LCN2 protein induced upregulation of glial fibrillary acidic protein (GFAP), cell migration, and morphological changes similar to characteristic phenotypic changes termed reactive astrogliosis. &lt;more data available...&gt;</p>                                        | <p>info:pmid/22030398#abs:6,<br/>info:pmid/19237579#abs:5,<br/>info:pmid/21278918#abs:9,<br/>info:pmid/19129400#abs:8,<br/>info:pmid/22346773#abs:11,<br/>info:pmid/23539193#abs:8,<br/>info:pmid/16952550#abs:9,<br/>info:pmid/15637066#body:190,<br/>info:pmid/19732769#body:174,<br/>info:pmid/24194573#cont:409<br/>&lt;more data available...&gt;</p>               | 2 | 18 | <p>Mesenchyme {Organ urn:<br/>agi-ncimorgan: C0162415},<br/>Central Nervous System {Organ urn: agi-ncimorgan: C0927232}, Endometrium {Organ urn: agi-ncimorgan: C1550633}, Liver {Organ urn: agi-ncimorgan: CL384198}, Brain {Organ urn: agi-ncimorgan: C1269537}, Breast {Organ urn: agi-ncimorgan: C0006141}</p> |
| LCN2 ---> cell invasion                       | Regulation | <p>We show that the LCN2 protein is required downstream of NFAT1 to increase breast cancer cell invasion., Previously, we reported that lipocalin 2 could revert 4T1-ras-transformed mesenchymal tumor cells to a more epithelial phenotype, increase E-cadherin expression, and suppress cell invasiveness <i>in vitro</i> and <i>in vivo</i>, indicating that lipocalin 2 is a metastasis suppressor., These data suggest that for KM12C colon carcinoma cells, NGAL overexpression promoted the cell invasion ability through an MMP9-independent mechanism. &lt;more data available...&gt;</p>                                                                 | <p>info:pmid/22767506#abs:4,<br/>info:pmid/17114340#abs:2,<br/>info:pmid/19308044#body:238,<br/>info:pmid/22800509#body:14,<br/>info:pmid/19237579#body:206,<br/>info:pmid/211741997#body:149,<br/>info:pmid/22728279#body:109,<br/>info:pmid/22328933#cont:250,<br/>info:pmid/21132267#cont:206,<br/>info:pmid/19419554#body:148<br/>&lt;more data available...&gt;</p> | 2 | 11 | <p>Ureteric bud {Organ urn:<br/>agi-ncimorgan: C1284058},<br/>Spleen {Organ urn:<br/>agi-ncimorgan: C1278932}</p>                                                                                                                                                                                                  |

|                            |                 |                                                                                                                                                                                                                                                                                                                                                                                                                                                                                                                                                                                                                                                                                                           |                                                                                                                                                                                                                                                                       |   |   |                                                                                                                                                   |
|----------------------------|-----------------|-----------------------------------------------------------------------------------------------------------------------------------------------------------------------------------------------------------------------------------------------------------------------------------------------------------------------------------------------------------------------------------------------------------------------------------------------------------------------------------------------------------------------------------------------------------------------------------------------------------------------------------------------------------------------------------------------------------|-----------------------------------------------------------------------------------------------------------------------------------------------------------------------------------------------------------------------------------------------------------------------|---|---|---------------------------------------------------------------------------------------------------------------------------------------------------|
| IGF2BP1 --> cell migration | Regulation      | IGF2BP1 thus promotes the velocity and persistence of tumor cell migration by controlling the expression of signaling proteins., Accordingly, IGF2BP1 knockdown causes MET-like (mesenchymal-epithelial-transition) morphological changes, enhances the formation of cell-cell contacts and reduces cell migration in various mesenchymal-like tumor-derived cells., IGF2BP1 promotes cell migration by regulating MK5 and PTEN signaling., Taken together, these data suggests that IMP1 might regulate cell migration and invasion in JAR cells through other downstream effectors. <more data available...>                                                                                            | info:pmid/22279049#abs:9, info:pmid/23677615#abs:7, info:pmid/222983196#cont:25, info:pmid/23911878#body:109, info:pmid/22266909#cont:48, info:pmid/22800433#cont:410, info:pmid/19726068#body:15                                                                     | 2 | 7 | Mesenchyme {Organ urn: agi-ncimorgan: C0162415}                                                                                                   |
| SOD3 --- apoptosis         | Regulation      | EC-SOD is critical for normal cardiac morphology and protects the heart from oxidant-induced fibrosis, apoptosis, and loss of function., In addition, we showed that the thin epidermis of EC-SOD transgenic mice results from the apoptosis of epidermal cells., Extracellular superoxide dismutase (SOD3), which dismutates superoxide anion to hydrogen peroxide, has been shown to reduce the free radical stress derived apoptosis in tissue injuries., Clinical chemistry and tissue pathology analyses showed that adenoviral EC-SOD gene transfer significantly attenuated release of liver enzymes and inhibited necrosis and apoptosis caused by paracetamol overdose. <more data available...> | info:pmid/19695260#abs:12, info:pmid/22251572#abs:8, info:pmid/21909393#abs:1, info:pmid/11529661#abs:7, info:pmid/21804221#abs:10, info:pmid/22140445#cont:277, info:pmid/16962671#body:55, info:pmid/17601801#body:193, info:doi/10.1016/j.jmig.2010.08.256#body:15 | 2 | 9 | Heart {Organ urn: agi-ncimorgan: C1281570}, Epidermis {Organ urn: agi-ncimorgan: C0014520}, Pulmonary artery {Organ urn: agi-ncimorgan: C0034052} |
| HIF1A --> FLT1             | PromoterBinding | Conversely, HIF-1alpha knockdown using antisense oligonucleotides, decreased sFlt-1 expression., In contrast, HIF-1a siRNA inhibited the LPS-induced increase in sFlt-1 production (Fig. 4C), The HIF (hypoxia-inducible factor)-1a transcription factor regulates VEGF and Flt-1 gene transcription [25]., The mRNA levels of VEGF, VEGFR1, Ang-2, and Ang-4 in HPaECs were also increased by either hypoxia or infection with Ad2/HIF-1alpha/VP16 (Figure 3), Further, Okuyama et al. stated that VEGFR1 expression was upregulated by HIF-1a after culturing Mesenchymal stem cells in hypoxic conditions [48]. <more data available...>                                                               | info:pmid/16627691#abs:7, info:pmid/21447646#cont:208, info:pmid/21929511#cont:39, info:pmid/12958144#body:98, info:pmid/20345248#cont:402, info:pmid/15896847#body:281, info:pmid/16574650#body:274, info:pmid/23034156#cont:129, info:pmid/23633414#cont:35         | 2 | 9 | Villus {Organ urn: agi-ncimorgan: C1519988}, Placenta {Organ urn: agi-ncimorgan: C1550656}                                                        |
| HIF1A --> FLT1             | MotTransport    | Furthermore, knockdown of hypoxia-inducible factor-1a inhibited the hypoxia-induced secretion of sFlt-1 and soluble endoglin., Additionally, siRNA-mediated knockdown of HIF-1a inhibited the hypoxia-induced secretion of sFlt-1 and soluble Endoglin., These results indicate that hypoxia-inducible factor-1a is a key mediator of the hypoxia-induced secretion of sFlt-1 and soluble endoglin.                                                                                                                                                                                                                                                                                                       | info:pmid/216411407#abs:7, info:doi/10.1016/j.placenta.2010.08.006#body:1429, info:doi/10.1016/j.ajpath.2011.02.013#body:91                                                                                                                                           | 2 | 3 | Chorionic villi {Organ urn: agi-ncimorgan: C0008508}                                                                                              |

|                           |            |                                                                                                                                                                                                                                                                                                                                                                                                                                                                                                                                                                                                                                                                                                                                                                  |                                                                                                                                                                                                                                                                                                                      |   |    |                                                                                                                                                                                                   |
|---------------------------|------------|------------------------------------------------------------------------------------------------------------------------------------------------------------------------------------------------------------------------------------------------------------------------------------------------------------------------------------------------------------------------------------------------------------------------------------------------------------------------------------------------------------------------------------------------------------------------------------------------------------------------------------------------------------------------------------------------------------------------------------------------------------------|----------------------------------------------------------------------------------------------------------------------------------------------------------------------------------------------------------------------------------------------------------------------------------------------------------------------|---|----|---------------------------------------------------------------------------------------------------------------------------------------------------------------------------------------------------|
| CRABP2 ---> apoptosis     | Regulation | Simvastatin interacts with the Retinoic acid system, inducing the expression of the key protein regulating the uptake of retinol (STRA6) and the expression of apoptosis-promoting CRABP2. Inhibition of CRABP-II enhanced retinoic acid-induced apoptosis and sensitized retinoic acid-resistant hepatocellular carcinoma cells to retinoic acid cytotoxicity by attenuating p42/44 MAPK and Akt activation. CRABP2 knockdown influences apoptosis and proliferation in endometrial stromal cells. Retinoic acid and Crabp2 may be regulating apoptosis (Donato and Noy, 2005), whereas the excess retinol is diverted to storage. <more data available...>                                                                                                     | info:pmid/23337719#abs:11, info:pmid/20350780#abs:5, info:pmid/20702525#cont:174, info:pmid/17363914#body:213, info:pmid/21515062#body:94, info:pmid/19181377#body:12, info:pmid/17512406#body:91, info:pmid/23874790#cont:23, info:doi/10.1016/j.fertnstert.2012.07.238#body:15                                     | 2 | 9  | Endometrium {Organ urn: agi-ncimorgan: C1550633}, Epidermis {Organ urn: agi-ncimorgan: C0014520}                                                                                                  |
| TGFB3 ---  cell migration | Regulation | In particular, betaglycan may be essential for inhibin-mediated regulation of granulosa cell migration and adhesion, which are integrally involved in the ... .. betaglycan tonically suppresses nuclear factor-?B-mediated breast cancer cell migration via its intracellular interactions with the scaffolding protein ?- ... . Moreover, overexpression of betaglycan resulted in a significant reduction in cell migration whereas inhibin- gene silencing enhanced both migration and invasion (63). For instance, Nov, Rgs4 and Tgfr3, which are inhibitors of cancer cell migration and invasion,48-50 were expressed in increased levels in DA.AC(Cia10). CONTEXT {10000151,10000158} <more data available...>                                           | info:pmid/1916448#body:229, info:pmid/23322721#cont:654, info:pmid/21174065#cont:280, info:pmid/22048456#cont:376, info:pmid/21550381#body:202, info:pmid/22521265#body:202, info:pmid/23925295#cont:35, info:pmid/20005735#body:84, info:pmid/20208565#body:41, info:pmid/19854227#body:217                         | 2 | 10 | Growing Follicle {Organ urn: agi-ncimorgan: C1512279}, Ovary {Organ urn: agi-ncimorgan: CL384202}, Fingers {Organ urn: agi-ncimorgan: C0016129}                                                   |
| WNT4 ---  apoptosis       | Regulation | WNT4 may also act to prevent oocyte apoptosis in the developing ovary [35]. Restoring Wnt4 or Wnt5a expression by gene transfection or recombinant protein reduced high glucose-induced cell apoptosis. Wnt4 was previously identified to control the nuclear localization of FOXO1, a transcription factor and known promoter of apoptosis (reviewed in). Since cell survival during decidualization appears to be regulated by WNT4, we wanted to determine the mechanism by which WNT4 regulates apoptosis. Together with a significant reduction in Spermatogonial stem cell numbers in 5-week-old mutant mouse testes (Fig. 1), this result suggests that WNT4 may also induce Spermatogonial stem cell apoptosis <i>in vivo</i> . <more data available...> | info:pmid/21297984#cont:116, info:pmid/16943306#body:228, info:pmid/22115959#body:189, info:pmid/21163860#cont:247, info:pmid/22253774#cont:111, info:doi/10.1016/j.jamcollsurg.2006.05.149#body:13                                                                                                                  | 2 | 6  | Ovary {Organ urn: agi-ncimorgan: CL384202}, Decidua {Organ urn: agi-ncimorgan: C0011106}, Testis {Organ urn: agi-ncimorgan: C1278981}                                                             |
| TGFB3 --+> apoptosis      | Regulation | However, hypoxia-induced apoptosis in cardiac fibroblasts were almost completely prevented by overexpression of TGFB3. TGFR-3 promotes important signaling events like growth regulation, migration, apoptosis, and differentiation [1,2]. Inhibition of nuclear factor-?B activity sensitizes granulosa cell tumor cells to TGFB2/betaglycan-mediated apoptosis. Transient overexpression of TGFB3 induces apoptosis in human nasopharyngeal carcinoma CNE-2Z cells. (2010) TGFB3, a potential negative regulator of transforming growth factor-b signaling, protects cardiac fibroblasts from hypoxia-induced apoptosis. <more data available...>                                                                                                              | info:pmid/21792916#abs:5, info:pmid/23826237#cont:17, info:pmid/23322721#cont:219, info:pmid/23387308#title:1, info:pmid/22028866#cont:473, info:pmid/20208565#body:188, info:pmid/19854227#body:214, info:pmid/22952931#cont:216, info:pmid/21550381#body:184, info:pmid/22521265#body:184 <more data available...> | 2 | 11 | Heart {Organ urn: agi-ncimorgan: C1281570}, Bone and Bones {Organ urn: agi-ncimorgan: C0262950}, Kidney {Organ urn: agi-ncimorgan: C1278978}, Adrenal Cortex {Organ urn: agi-ncimorgan: C0001613} |

|                                                 |            |                                                                                                                                                                                                                                                                                                                                                                                                                                                                                                                                                                                                                                                                             |                                                                                                                                                                                                                                                                 |   |   |                                                                                              |
|-------------------------------------------------|------------|-----------------------------------------------------------------------------------------------------------------------------------------------------------------------------------------------------------------------------------------------------------------------------------------------------------------------------------------------------------------------------------------------------------------------------------------------------------------------------------------------------------------------------------------------------------------------------------------------------------------------------------------------------------------------------|-----------------------------------------------------------------------------------------------------------------------------------------------------------------------------------------------------------------------------------------------------------------|---|---|----------------------------------------------------------------------------------------------|
| ESRP1 ---  epithelial to mesenchymal transition | Regulation | We further show that ectopically expressing ESRP1 inhibits Snail-induced Epithelial-mesenchymal transition, suggesting that down-regulation of ESRP1 is required for function by Snail in Epithelial-mesenchymal transition. Down-regulation of ESRP1 induces epithelial-mesenchymal transition phenotypes ( ). Furthermore, expression of ESRP1/2 mRNA decreased in a model of epithelial-to-mesenchymal transition. ESRP1 and -2 have been proposed as new master regulators of epithelial-mesenchymal transition (28), and our finding that ESRP1 and E-cadherin mRNA were ... <more data available...>                                                                  | info:pmid/22961986#abs:6, info:pmid/24035864#body:248, info:pmid/19328061#body:18, info:pmid/22585092#cont:162, info:pmid/21393860#cont:182, info:pmid/23825128#cont:397, info:pmid/22349259#cont:190, info:pmid/222548723#body:153, info:pmid/24331928#body:38 | 2 | 9 | Mesenchyme {Organ urn: agi-ncimorgan: C0162415}                                              |
| KRT18 --> cell invasion                         | Regulation | KRT18 plays an important role in tumor cell invasion by increasing cell flexibility and motility. Moreover, in line with the emergence of keratins as multifunctional regulators of epithelial malignancies, the persistence of K8/K18 IFs is a hallmark of invasive squamous cell carcinoma, where such perturbed K8/K18 expression appears to contribute to cell invasiveness. With regard to cancer, there is accumulating evidence showing, for instance, that persistence of K8/K18 IFs is a hallmark of invasive squamous cell carcinoma, where such perturbed K8/K18 expression appears to contribute to cell invasiveness through an actin-dependent motility [18]. | info:pmid/15177556#body:116, info:pmid/23164509#body:22, info:pmid/222685604#cont:40                                                                                                                                                                            | 2 | 3 | Peritoneal Cavity {Organ urn: agi-ncimorgan: C1704247}                                       |
| IGF2BP1 ---  apoptosis                          | Regulation | CRD-BP down-regulation contributes to cell sensitization by increasing apoptosis and diminishing melanoma cell growth in response to chemotherapeutic agents. Knockdown of CRD-BP inhibits NF-kappaB activity, induces apoptosis, and suppresses proliferation and tumorigenic properties of melanoma cells. Furthermore, we show that loss of IMP-1 induces Caspase-3- and PARP-mediated apoptosis, and inhibits K-Ras expression in SW480 cells, which is rescued by CYFIP2 knockdown. A study has indicated that CRD-BP, the ortholog of IMP1, promotes cell proliferation by suppressing apoptosis. <more data available...>                                            | info:pmid/21981993#abs:5, info:pmid/18454174#abs:4, info:pmid/21252116#abs:8, info:pmid/23911878#body:11, info:pmid/19647520#body:68                                                                                                                            | 2 | 5 |                                                                                              |
| GLIPR2 --> epithelial to mesenchymal transition | Regulation | However, whether GLIPR-2 could induce type 3 epithelial-to-mesenchymal transition in carcinogenesis needs further investigation. The origin of these myofibroblasts is not known, but <i>in vitro</i> studies have shown that GLIPR-2 can induce epithelial to mesenchymal transition in a renal epithelial cell line. GLIPR-2 overexpression in HK-2 cells promotes an epithelial-to-mesenchymal transition through extracellular signal-regulated kinases 1 and 2 activation.                                                                                                                                                                                             | info:pmid/24204846#abs:3, info:pmid/17055234#abs:7, info:pmid/23516513#cont:222                                                                                                                                                                                 | 2 | 3 | Kidney {Organ urn: agi-ncimorgan: C1278978}, Mesenchyme {Organ urn: agi-ncimorgan: C0162415} |
| TXNIP --> epithelial to mesenchymal transition  | Regulation | These results suggested that knockdown of TXNIP antagonized high glucose-induced Epithelial to mesenchymal transition by inhibiting reactive oxygen species production, activation of p38 MAPK and ERK1/2, and expression of TGF- $\beta$ 1, highlighting TXNIP as a potential therapy target for diabetic nephropathy. Deficiency of thioredoxin binding protein-2 enhances TGF- $\beta$ signaling and promotes epithelial to mesenchymal transition.                                                                                                                                                                                                                      | info:pmid/24041652#abs:11, info:pmid/22768160#title:1                                                                                                                                                                                                           | 2 | 2 |                                                                                              |

|                                                |            |                                                                                                                                                                                                                                                                                                                                                                                                                                                                                                                                                                                                                                                                                                                                                                                            |                                                                                                                                                                                                                                                                                                                         |   |    |                                                                                                                                                                      |
|------------------------------------------------|------------|--------------------------------------------------------------------------------------------------------------------------------------------------------------------------------------------------------------------------------------------------------------------------------------------------------------------------------------------------------------------------------------------------------------------------------------------------------------------------------------------------------------------------------------------------------------------------------------------------------------------------------------------------------------------------------------------------------------------------------------------------------------------------------------------|-------------------------------------------------------------------------------------------------------------------------------------------------------------------------------------------------------------------------------------------------------------------------------------------------------------------------|---|----|----------------------------------------------------------------------------------------------------------------------------------------------------------------------|
| THBS1 --> epithelial to mesenchymal transition | Regulation | Using two Pofut2 gene-trap lines, we demonstrated that O-fucosylation of Thrombospondin type 1 repeats was essential for restricting epithelial to mesenchymal transition in the primitive streak, correct patterning of mesoderm, and localization of the definitive endoderm., TGF-β and thrombospondin-1 from such tumors could be partly responsible for both Treg induction and the further enhancement of Epithelial-mesenchymal transition in an autocrine manner., Progress was made recently by Du et al (2010) using Pofut2 knockout mice where they found that O-fucosylation of thrombospondin type 1 repeats is critical for restricting epithelial-to-mesenchymal transition, correct patterning of the mesoderm, and localization of the endoderm in embryonic development. | info:pmid/20637190#abs:3,<br>info:pmid/19249678#body:45,<br>info:pmid/22588082#cont:32                                                                                                                                                                                                                                  | 2 | 3  | Primitive Streak {Organ urn: agi-ncimorgan: C0033153}                                                                                                                |
| SOD3 --> cell migration                        | Regulation | Furthermore, Langerhans cell migration to lymph nodes was impaired in EC-SOD transgenic mice., In addition, we demonstrated that SOD3 inhibits ovalbumin-induced airway extracellular remodeling and T helper 2 cell trafficking., Figure 6 Ddx5 and Ddx17-regulated SOD3 expression is involved in cell migration and invasion., This result is consistent with a previous report that showed that EC-SOD reduces inflammatory cell migration (Laurila et al., 2009)., In addition, we demonstrated that SOD3 inhibits OVA-induced airway extracellular remodeling and Th2 cell trafficking.                                                                                                                                                                                              | info:pmid/17392825#abs:7,<br>info:pmid/22583151#abs:7,<br>info:pmid/23022728#cont:425,<br>info:pmid/23223134#cont:661,<br>info:doi/10.1016/j.jdermsci.2012.11.328#body:7                                                                                                                                                | 2 | 5  | Lymph Nodes {Organ urn: agi-ncimorgan: C0154054},<br>airway {Organ urn: agi-ncimorgan: C0458827}                                                                     |
| WNT4 --> epithelial to mesenchymal transition  | Regulation | Wnt4 regulates epithelial to mesenchymal transition and ductal branching.                                                                                                                                                                                                                                                                                                                                                                                                                                                                                                                                                                                                                                                                                                                  | info:pmid/24099911#body:166                                                                                                                                                                                                                                                                                             | 2 | 1  | Mammary Gland {Organ urn: agi-ncimorgan: C0929301}                                                                                                                   |
| THBS1 --> MMP2                                 | Expression | MMP2 mRNA was upregulated 1.7-fold by TSP-1 at 10 and 20 microg/mL., As indicated above within this section, different TSP-1 fragments produced after thrombin treatment can stimulate or inhibit MMP-2 and MMP-9 synthesis., Taken together, these observations suggest that TSP1 and -2 can inhibit generation of active gelatinase (MMP2 and MMP9) species., It suggests that SHWSPW heparin-binding sequence within TSRs of TSP-1, and/or an adjacent sequence might be involved in collagen-binding domain123 interaction with TSP-1, further influencing MMP-2 levels. <more data available...>                                                                                                                                                                                      | info:pmid/12844104#abs:11,<br>info:pmid/20006665#body:348,<br>info:pmid/10900205#body:318,<br>info:pmid/18222489#body:78,<br>info:pmid/19129184#body:414,<br>info:pmid/15036264#body:249,<br>info:pmid/12128069#body:75,<br>info:pmid/17126831#body:133,<br>info:pmid/12235282#body:112,<br>info:pmid/17761938#body:175 | 2 | 10 | Dermis {Organ urn: agi-ncimorgan: C0011646},<br>Cardiovascular system {Organ urn: agi-ncimorgan: C1269562},<br>Carotid Arteries {Organ urn: agi-ncimorgan: C0007272} |

|                     |                  |                                                                                                                                                                                                                                                                                                                                                                                                                                                                                                                                                                                                                                                                                                       |                                                                                                                                                                                                                                                                                                                |   |    |                                                                                                                                                                                                                                                                                                                                                                                                                                                                         |
|---------------------|------------------|-------------------------------------------------------------------------------------------------------------------------------------------------------------------------------------------------------------------------------------------------------------------------------------------------------------------------------------------------------------------------------------------------------------------------------------------------------------------------------------------------------------------------------------------------------------------------------------------------------------------------------------------------------------------------------------------------------|----------------------------------------------------------------------------------------------------------------------------------------------------------------------------------------------------------------------------------------------------------------------------------------------------------------|---|----|-------------------------------------------------------------------------------------------------------------------------------------------------------------------------------------------------------------------------------------------------------------------------------------------------------------------------------------------------------------------------------------------------------------------------------------------------------------------------|
| THBS1 ---><br>MMP2  | DirectRegulation | A binding assay was used to determine the specificity of TSP-1 binding to MMP2. Although MMP2 interacted with TSP1 and TSP2 via its gelatin-binding domain or a closely mapping site, neither TSP1 nor TSP2 was degraded by MMP2 <i>in vitro</i> , collagen-binding domain 123, as well as individual domains, behave as competitive inhibitors of the TSP-1-directed endocytic clearance of active MMP-2, but not of its latent form, by HT1080 fibrosarcoma cells. Furthermore, showed that TSP-1 may also interact with MMP2 and by this mean inhibit the proMMP2 activation. <more data available...>                                                                                             | info:pmid/12844104#abs:8, info:pmid/10900205#abs:8, info:pmid/18222489#abs:3, info:pmid/18321763#body:120, info:pmid/22798012#cont:143, info:pmid/11805097#body:48, info:pmid/23853587#cont:754, info:pmid/23749112#cont:285, info:pmid/21744247#cont:75, info:pmid/15655118#body:164 <more data available...> | 2 | 41 | Aorta {Organ urn: agi-ncimorgan: C1278934}, Blood Vessels {Organ urn: agi-ncimorgan: C0005847}, Arteries {Organ urn: agi-ncimorgan: C0003842}, Heart {Organ urn: agi-ncimorgan: C1281570}, trabecular meshwork {Organ urn:agi-organ:trabecular%20meshwork}, Coronary artery {Organ urn: agi-ncimorgan: C1269008}, Tendon {Organ urn: agi-ncimorgan: C0039508}, Carotid Arteries {Organ urn: agi-ncimorgan: C0007272}, Basal lamina {Organ urn: agi-ncimorgan: C0085872} |
| KRT18 ---><br>KRT14 | Regulation       | In this report, we identified K18 phospho-Ser33 as the site that regulates keratin/14-3-3 binding during mitosis, and showed that K18 Ser33 phosphorylation generates a unique motif that is essential but not sufficient for binding of 14-3-3 proteins.                                                                                                                                                                                                                                                                                                                                                                                                                                             | info:pmid/9524113#body:52                                                                                                                                                                                                                                                                                      | 2 | 1  | Breast {Organ urn: agi-ncimorgan: C0006141}                                                                                                                                                                                                                                                                                                                                                                                                                             |
| KRT14 ---><br>KRT18 | Regulation       | Similarly, ITGA6, ITGB4, and CK14 decreased (Figure 1d) and CK18 (Figure 1e) increased at the protein level. When the urea concentration was raised to 8 M under otherwise identical conditions, the K5-K18 tetramers were destabilized to a greater extent than K5-K14 ones (data not shown).                                                                                                                                                                                                                                                                                                                                                                                                        | info:pmid/20379195#cont:82, info:pmid/9786957#body:338                                                                                                                                                                                                                                                         | 2 | 2  |                                                                                                                                                                                                                                                                                                                                                                                                                                                                         |
| LCN2 ----<br>MMP2   | Binding          | Neutrophil gelatinase-associated lipocalin (NGAL) is an early indicator of kidney injury. Levels of Cystatin-C, as well as serum and urine neutrophil gelatinase-associated lipocalin (NGAL), were significantly augmented. This review discusses a member of the lipocalin superfamily, 24p3 or neutrophil gelatinase-associated lipocalin (NGAL), which induces the formation of kidney epithelia. In this study, levels of interleukin -8, IL-6, interleukin-1 receptor antagonist (IL-1ra), secretory leukocyte protease inhibitor (SLPI), and neutrophil gelatinase-associated lipocalin (NGAL) were measured in divers before and after a 2-mo period of daily diving. <more data available...> | info:pmid/16773412#abs:2, info:pmid/22725830#abs:7, info:pmid/12788784#abs:4, info:pmid/12015350#abs:3, info:pmid/23535405#abs:2, info:pmid/23477150#abs:1, info:pmid/21714857#abs:4, info:pmid/21311195#abs:1, info:pmid/22268365#abs:2, info:pmid/11574282#body:50 <more data available...>                  | 2 | 21 | Kidney {Organ urn: agi-ncimorgan: C1278978}, Heart {Organ urn: agi-ncimorgan: C1281570}, Renal Tubule {Organ urn: agi-ncimorgan: CL355448}, Ovary {Organ urn: agi-ncimorgan: CL384202}                                                                                                                                                                                                                                                                                  |
| CASP4 ---><br>VIM   | ProtModification | Interestingly, caspase-4 led to a dose-dependent cleavage of human vimentin ( ) that was blocked by a specific caspase-4 inhibitor ( , lanes 5 and 6).                                                                                                                                                                                                                                                                                                                                                                                                                                                                                                                                                | info:pmid/16127151#body:188                                                                                                                                                                                                                                                                                    | 2 | 1  | Synovial Membrane {Organ urn: agi-ncimorgan: C0039099}                                                                                                                                                                                                                                                                                                                                                                                                                  |

|                     |                  |                                                                                                                                                                                                                                                                                                                                                                                                                                                                                                                                                                                                                                                                                                                                                          |                                                                                                                                                                                                                                                                                                                                                    |   |    |                                                                                                                                                                                                         |
|---------------------|------------------|----------------------------------------------------------------------------------------------------------------------------------------------------------------------------------------------------------------------------------------------------------------------------------------------------------------------------------------------------------------------------------------------------------------------------------------------------------------------------------------------------------------------------------------------------------------------------------------------------------------------------------------------------------------------------------------------------------------------------------------------------------|----------------------------------------------------------------------------------------------------------------------------------------------------------------------------------------------------------------------------------------------------------------------------------------------------------------------------------------------------|---|----|---------------------------------------------------------------------------------------------------------------------------------------------------------------------------------------------------------|
| ST14 --><br>MMP3    | Regulation       | Moreover, it was found that purified matrilysin activated one of the important matrix metalloproteinases, stromelysin (MMP-3). This is intriguingly analogous to the phenotype of transgenic mice with overexpression of epithin in the skin, and epithin can proteolytically activate MMP-3. Epithin/matriptase has been shown to directly activate the latent forms of HGF ( ), uPA ( ) and MMP3 ( ) <i>in vitro</i> . uPA mRNA is expressed in mammary epithelium of nulliparous adult, early and mid-pregnancy, is subsequently down regulated during lactation, and reappears during involution ( ). <more data available...>                                                                                                                       | info:pmid/16999819#abs:7,<br>info:pmid/20398629#body:109,<br>info:pmid/19853659#body:72,<br>info:doi/10.2353/ajpath.2010.100228#body:215                                                                                                                                                                                                           | 2 | 4  | Skin {Organ urn:<br>agi-ncimorgan: C0684084},<br>Prostate {Organ urn:<br>agi-ncimorgan: C1278980}                                                                                                       |
| EGLN3 ---><br>HIF1A | ProtModification | Many studies have shown that PHD3 not only can hydroxylate Hypoxia inducible factor-1a, but also has various other biological functions. The present study identifies a novel layer in the regulation of HIF1a hydroxylation by PHD1/3. Recent report, however, indicates that PHD2 and 3 hydroxylate HIF-1a and HIF-2a with similar efficiency. In 2007, Fedulova and co-workers demonstrated that PHD-3 hydroxylates P567 in HIF-1a, which is not LxxLAP motif compliant. Although PHD1 and PHD3 can hydroxylate HIF-1a <i>in vitro</i> , HIF does not appear to be their physiological target in the cell (32). <more data available...>                                                                                                              | info:pmid/24049515#abs:3,<br>info:pmid/15210114#body:113,<br>info:pmid/22804960#cont:14,<br>info:pmid/23886708#body:22,<br>info:pmid/23807085#cont:134,<br>info:pmid/21575608#body:75,<br>info:pmid/19683567#body:12,<br>info:pmid/21665470#body:6,<br>info:pmid/21421125#body:102,<br>info:pmid/24222137#cont:183<br><more data available...>     | 2 | 41 | Retina {Organ urn:<br>agi-ncimorgan: C1962966},<br>Fingers {Organ urn:<br>agi-ncimorgan: C0016129},<br>Kidney {Organ urn:<br>agi-ncimorgan: C1278978},<br>Heart {Organ urn:<br>agi-ncimorgan: C1281570} |
| HIF1A ---><br>EGLN3 | Expression       | Reporter analysis shows that the hypoxic induction of the PHD2 promoter is hypoxia-inducible factor-1a dependent, whereas PHD3 promoter/enhancer activity is dependent on both hypoxia-inducible factor-1a and hypoxia-inducible factor-2a. This is because the transcription of PHD3 is regulated by hypoxia inducible factor-1a. They also demonstrated a massive transcription induction of PHD-3 mRNA promoted by HIF-1a. Although hypoxia decreases overall PHD activity, upregulation of HIF-1a induces the expression of PHD2 and PHD3.70 <more data available...>                                                                                                                                                                                | info:pmid/22451659#abs:5,<br>info:pmid/21575608#body:90,<br>info:pmid/23886708#body:130,<br>info:pmid/23486514#cont:106,<br>info:pmid/20980436#cont:139,<br>info:pmid/17003045#body:219,<br>info:pmid/24015760#cont:171,<br>info:pmid/17434750#body:223,<br>info:pmid/21927022#cont:66,<br>info:pmid/17387348#body:118<br><more data available...> | 2 | 13 | nucleus pulposus {Organ urn:<br>agi-ncimorgan: C1185714}                                                                                                                                                |
| EGLN3 ---><br>HIF1A | Expression       | Prolyl hydroxylase-3 (PHD3) regulates degradation of hypoxia-inducible factor-1a. Overexpression of SM-20/PHD3 transiently resulted in a decrease in hypoxia-inducible factor-1 alpha protein concentrations under basal conditions as well as after stimulation with ANG II. We recently identified a new WD-repeat protein designated Morgl (MAPK organizer 1) that interacts with prolyl hydroxylase 3 (PHD3), an important enzyme involved in the regulation of HIF-1a and HIF-2a expression. We recently identified a novel WD-repeat protein designated Morgl (MAPK organizer 1) that interacts with prolyl hydroxylase 3 (PHD3), an important enzyme involved in the regulation of HIF-1alpha and HIF-2alpha expression. <more data available...> | info:pmid/20978507#abs:2,<br>info:pmid/15308873#abs:14,<br>info:pmid/22982595#abs:3,<br>info:pmid/19726548#abs:3,<br>info:pmid/19574556#body:166,<br>info:pmid/21818118#cont:272,<br>info:pmid/22213839#body:4,<br>info:pmid/21575608#body:75,<br>info:pmid/12181324#body:281,<br>info:pmid/21620138#body:127<br><more data available...>          | 2 | 25 | Kidney {Organ urn:<br>agi-ncimorgan: C1278978},<br>Placenta {Organ urn:<br>agi-ncimorgan: C15506561},<br>Lower Extremity {Organ urn:<br>agi-ncimorgan: C0023216}                                        |
| MMP3 ---><br>THBS1  | ProtModification | Biosynthesis and expression of a disintegrin-like and metalloproteinase domain with thrombospondin-1 repeats-15: a novel versican-cleaving proteoglycanase.                                                                                                                                                                                                                                                                                                                                                                                                                                                                                                                                                                                              | info:pmid/24220035#title:1                                                                                                                                                                                                                                                                                                                         | 2 | 1  |                                                                                                                                                                                                         |

|                    |                  |                                                                                                                                                                                                                                                                                                                                                                                                                                                                                                                                                                                                                                                                                                                                                     |                                                                                                                                                             |   |   |                                                                                                                                                             |
|--------------------|------------------|-----------------------------------------------------------------------------------------------------------------------------------------------------------------------------------------------------------------------------------------------------------------------------------------------------------------------------------------------------------------------------------------------------------------------------------------------------------------------------------------------------------------------------------------------------------------------------------------------------------------------------------------------------------------------------------------------------------------------------------------------------|-------------------------------------------------------------------------------------------------------------------------------------------------------------|---|---|-------------------------------------------------------------------------------------------------------------------------------------------------------------|
| THBS1 --- <br>MMP3 | Expression       | Moreover, TSP-1 null hearts had increased myocardial matrix metalloproteinase 3 expression and enhanced matrix metalloproteinase 9 activation after pressure overload. Furthermore, matrix metalloproteinase 3 and 9 are upregulated in Tsp1-knockout mice. Thus, processing and consequent activation of pro-MMP-9 to MMP-9 by physiological activators such as MMP-3 is blocked by TSP-1. thrombospondin-1 may inhibit MMP-9 activity by preventing activation of pro-MMP-2, and MMP-3 can cleave and activate MMP-2 and MMP-9.                                                                                                                                                                                                                   | info:pmid/21947471#abs:10,<br>info:pmid/24492068#body:98,<br>info:doi/10.1016/S1471-4914(01)02075-5#body:17,<br>info:doi/10.1016/j.bbrc.2006.12.064#body:99 | 2 | 4 | Heart {Organ urn:<br>agi-ncimorgan: C1281570},<br>Mammary Gland {Organ urn:<br>agi-ncimorgan: C0929301}                                                     |
| CDHI ---- ST14     | Binding          | Epithin colocalized with E-cadherin at the membrane contacts of the compacted morula-stage embryo as revealed by double-staining immunocytochemistry and confocal microscopy, respectively. Matriptase is expressed during intestinal epithelial differentiation and colocalizes with E-cadherin to apical junctional complexes in differentiated polarized Caco-2 monolayers., Epithin, a type II membrane serine protease, colocalizes with E-cadherin in mouse conceptus ( ), suppressor of tumorigenicity 14 encodes a membrane-associated serine protease (matriptase) that colocalizes with E-cadherin, can process the hepatocyte growth factor precursor and plays a role in epithelial differentiation and maintenance of tight junctions. | info:pmid/15848395#abs:6,<br>info:pmid/20142489#abs:4,<br>info:pmid/18155829#body:75,<br>info:pmid/20980099#body:197                                        | 2 | 4 | Morula {Organ urn:<br>agi-ncimorgan: C0026573},<br>Intestines {Organ urn:<br>agi-ncimorgan: C0021853},<br>Conceptus {Organ urn:<br>agi-ncimorgan: C1516779} |
| KRT18 ---> FAS     | Expression       | The results also did not support the idea that K8/K18 filaments influence the expression of Fas on the surface of bovine luteal cells. Notably, intermediate filaments such as keratin 8 and 18 have been suggested to prevent CD95 targeting to the membrane by a process involving microtubules. As demonstrated in Fig. 4 B, the total content of the death receptor was not affected by the K8-null mutation, thus suggesting that K8/K18 modulate Fas targeting to the surface membrane. Furthermore, keratin 8/18 filaments regulate Fas receptor signaling, and modest overexpression of the phosphorylation mutant K8 S73A significantly enhances Fas-mediated apoptosis in transgenic mouse livers ( ). <more data available...>           | info:pmid/23113883#abs:10,<br>info:pmid/15501679#body:81,<br>info:pmid/11514590#body:121,<br>info:pmid/22960429#body:145,<br>info:pmid/19282868#body:38     | 2 | 5 | Liver {Organ urn:<br>agi-ncimorgan: CL384198},<br>Kidney {Organ urn:<br>agi-ncimorgan: C1278978}                                                            |
| FAS ---> KRT18     | Regulation       | SV40 infection also suppressed CD95-mediated cleavage of cytokeratin-18 (Figure 1b). Fas administration also modulates Keratin 8/K18 phosphorylation (Ku et al., 2003), including an increase in Keratin 8 serine 73/S431 and a decrease in K18 S33 phosphorylation in all transgenic lines (Fig. 2C). For instance, Fas stimulation activates the anti-apoptotic ERK1/2 signaling pathway at the early period and the stress-associated kinase JNK at a later period, and this results to phosphorylation of specific Ser residues on K8 and K18.                                                                                                                                                                                                  | info:pmid/11803462#body:94,<br>info:pmid/16818723#body:86,<br>info:pmid/17498695#body:79                                                                    | 2 | 3 |                                                                                                                                                             |
| KRT18 ---><br>VIM  | ProtModification | During viral replication, all of vimentin were degraded and phosphorylated keratin 18 increased.                                                                                                                                                                                                                                                                                                                                                                                                                                                                                                                                                                                                                                                    | info:pmid/3396082#abs:5                                                                                                                                     | 2 | 1 |                                                                                                                                                             |

|                    |                  |                                                                                                                                                                                                                                                                                                                                                                                                                                                                                                                                                                                                                                                                                                      |                                                                                                                                                                                          |   |   |                                                                                                                                                        |
|--------------------|------------------|------------------------------------------------------------------------------------------------------------------------------------------------------------------------------------------------------------------------------------------------------------------------------------------------------------------------------------------------------------------------------------------------------------------------------------------------------------------------------------------------------------------------------------------------------------------------------------------------------------------------------------------------------------------------------------------------------|------------------------------------------------------------------------------------------------------------------------------------------------------------------------------------------|---|---|--------------------------------------------------------------------------------------------------------------------------------------------------------|
| VIM ---><br>KRT18  | DirectRegulation | It was already shown that K18 could possibly interact with vimentin to form mixed filaments., honokiol blocked TGFβ/TNFα-induced modulation of mesenchymal and epithelial markers leading to decreased expression of vimentin and fibronectin and elevated expression of occludin and CK-18 (B, C). Furthermore, green fluorescent protein-K18 colocalized exclusively with the endogenous tonofibrils and not with the endogenous vimentin fibrils as demonstrated by the direct observation of a live PtK2 cell (Fig 1G), followed by fixing and processing the same cell for double immunofluorescence (Fig 1H and Fig 1). <more data available...>                                               | info:pmid/20109457#body:97,<br>info:pmid/24508063#body:98,<br>info:pmid/11331302#body:199,<br>info:pmid/22906492#body:102                                                                | 2 | 4 | Mesenchyme {Organ urn:<br>agi-ncimorgan: C0162415}                                                                                                     |
| CLDN7 ---><br>CDH1 | Expression       | Decreased claudin-7 expression, in turn, leads to attenuation of E-cadherin expression., Notably, similar to our findings, claudin-7-dependent regulation of E-cadherin was unidirectional because forced E-cadherin expression in the same cells did not affect claudin-7 expression., Knockdown of claudin-7 expression in esophageal squamous cell carcinoma cells induces loss of E-cadherin, along with increased cell growth and enhanced cell invasion [84]. While the mislocalization of claudin-7 in esophageal squamous cell carcinoma leads to the loss of E-cadherin expression, N-glycosylation of E-cadherin has been shown to stabilize tight junctions [8]. <more data available...> | info:pmid/23969095#body:6,<br>info:pmid/21878201#body:134,<br>info:pmid/24009024#cont:393,<br>info:pmid/20953359#cont:22,<br>info:pmid/20334898#body:105,<br>info:pmid/17255337#body:234 | 2 | 6 | Ovary {Organ urn:<br>agi-ncimorgan: CL384202},<br>Breast {Organ urn:<br>agi-ncimorgan: C0006141},<br>Esophagus {Organ urn:<br>agi-ncimorgan: C1278919} |
| SOD3 ---><br>HIF1A | Expression       | Combined, these results suggest that the Hypoxia-inducible factor-1α suppression by Extracellular superoxide dismutase may be due to the decreased levels of O2- and not due to increased levels of H2O2 or other hydroperoxides., High expression levels of SOD3 was reported to significantly induce the expression of HIF-1α in tumors, under hypoxic conditions, and thus demonstrates a relationship between SOD3 and HIF-1α pathways., Conclusion: Inhibition of NADPH oxidoreductase attenuates expression of SOD3, which decreases expression of hypoxia inducible factor-1α, and subsequently promotes apoptosis.                                                                           | info:pmid/24509158#body:108,<br>info:pmid/21620448#body:115,<br>info:doi/10.1016/j.jmig.2010.08.256#body:15                                                                              | 2 | 3 |                                                                                                                                                        |
| CDH1 ---><br>KRT18 | ProtModification | Confocal Z-stacks of cultured trophoblasts co-stained for E-cadherin (green), cleaved cytokeratin 18 (red) and DNA (blue)., We assessed the localization patterns of caspase-cleaved forms of cytokeratin 18 by co-staining tissues for E-cadherin, DNA and caspase-cleaved forms of cytokeratin 18 and examination by Z-stack confocal microscopy.                                                                                                                                                                                                                                                                                                                                                  | info:pmid/23102999#body:49,<br>info:pmid/22341340#body:49                                                                                                                                | 2 | 2 | Villus {Organ urn:<br>agi-ncimorgan: C1519988}                                                                                                         |
| KRT18 --+><br>CDH1 | Regulation       | Both CK18 and E-cadherin (Cdh1) gene expression increased significantly from day 0 to day 7 (10.3-fold for CK18 and 1.7-fold for E-cadherin) and from day 7 to day 21 (1.6-fold for CK18 and 3.2-fold for E-cadherin) while vimentin and Snail1 except Twist1 demonstrated downward trend in expression between day 0 and day 21 (1.9-fold for vimentin and 4.5-fold for Snail1) (Figure 5B).                                                                                                                                                                                                                                                                                                        | info:pmid/21347296#body:203                                                                                                                                                              | 2 | 1 |                                                                                                                                                        |

|                     |              |                                                                                                                                                                                                                                                                                                                                                                                                                                                                                                                                                                                                                                                                                                                                                                                                                                                                                                                          |                                                                                                                                                                                                                                                                                                |   |   |                                                                                                                         |
|---------------------|--------------|--------------------------------------------------------------------------------------------------------------------------------------------------------------------------------------------------------------------------------------------------------------------------------------------------------------------------------------------------------------------------------------------------------------------------------------------------------------------------------------------------------------------------------------------------------------------------------------------------------------------------------------------------------------------------------------------------------------------------------------------------------------------------------------------------------------------------------------------------------------------------------------------------------------------------|------------------------------------------------------------------------------------------------------------------------------------------------------------------------------------------------------------------------------------------------------------------------------------------------|---|---|-------------------------------------------------------------------------------------------------------------------------|
| TXNIP --- <br>HIF1A | Expression   | <p>Taken together, these findings indicate that VDUP1 is a novel tumor suppressor which mediates the nuclear export of pVHL/HIF1alpha complex to destabilize HIF1alpha., TXNIP also associates with the von Hippel-Landau protein (pVHL), enhancing the interaction between pVHL and HIF1a to promote nuclear export and degradation of HIF1a., TXNIP may affect the glucose uptake through the suppression of two important regulators of glycolysis, Akt [56] and HIF-1a [80], ... the a-ar-restin gene family, TXNIP also inhibits glucose uptake and lactate production by destabilizing the hypoxia-induced transcription factor (HIF1a) ... &lt;more data available...&gt;</p>                                                                                                                                                                                                                                     | <p>info:pmid/18062927#abs:6,<br/>info:pmid/20584310#body:82,<br/>info:pmid/20844768#cont:296,<br/>info:pmid/22904171#cont:139,<br/>info:pmid/24098117#cont:112</p>                                                                                                                             | 2 | 5 | <p>Ovarian Follicle {Organ um:<br/>agi-ncimorgan: C1283799},<br/>Lung {Organ um:<br/>agi-ncimorgan: C1278908}</p>       |
| TXNIP ---><br>HIF1A | MolTransport | <p>VDUP1 mediates nuclear export of HIF1alpha via CRM1-dependent pathway., (2008) VDUP1 mediates nuclear export of HIF1alpha via CRM1-dependent pathway.</p>                                                                                                                                                                                                                                                                                                                                                                                                                                                                                                                                                                                                                                                                                                                                                             | <p>info:pmid/18062927#title:1,<br/>info:pmid/20844768#cont:591</p>                                                                                                                                                                                                                             | 2 | 2 |                                                                                                                         |
| FAS ---><br>THBS1   | Regulation   | <p>The endothelial cell apoptotic activity of THBS-1 is mediated through interaction with the Fas/Fas ligand, caspase-3 activation and FAK fragmentation (Volpert et al, 2002).</p>                                                                                                                                                                                                                                                                                                                                                                                                                                                                                                                                                                                                                                                                                                                                      | <p>info:pmid/19738618#body:280</p>                                                                                                                                                                                                                                                             | 2 | 1 |                                                                                                                         |
| THBS1 --><br>FAS    | Regulation   | <p>Specificity for remodeling vessels is provided by the dependence of TSP1-induced apoptosis on Fas-Fas ligand interactions, which occur preferentially in capillary sprouts.</p>                                                                                                                                                                                                                                                                                                                                                                                                                                                                                                                                                                                                                                                                                                                                       | <p>info:pmid/12231357#body:111</p>                                                                                                                                                                                                                                                             | 2 | 1 | <p>Cornea {Organ um:<br/>agi-ncimorgan: C1550625}</p>                                                                   |
| ITGB3 ---<br>THBS1  | Binding      | <p>Because TSP-1 is an integrin <math>\beta 3</math> ligand, we sought to determine whether upregulation of TSP-1 might promote the association of a <math>\alpha V\beta 3</math> with PKC<math>\beta</math> and trigger downstream signaling.</p>                                                                                                                                                                                                                                                                                                                                                                                                                                                                                                                                                                                                                                                                       | <p>info:pmid/20184965#body:132</p>                                                                                                                                                                                                                                                             | 2 | 1 |                                                                                                                         |
| THBS1 --><br>ITGB3  | Regulation   | <p>In aortas from diabetic animals and in hyperglycemic cells, the absence of TSP-1 reduced the association of integrin <math>\beta 3</math> and PKC<math>\beta</math> (D and E) Moreover, under conditions of euglycemia, the association of PKC<math>\beta</math> with integrin <math>\beta 3</math> was promoted by the addition of TSP-1 to smooth muscle cells (F).</p>                                                                                                                                                                                                                                                                                                                                                                                                                                                                                                                                             | <p>info:pmid/20184965#body:139</p>                                                                                                                                                                                                                                                             | 2 | 1 | <p>Aorta {Organ um:<br/>agi-ncimorgan: C1278934}</p>                                                                    |
| LCN2 --><br>CDHI    | Expression   | <p>Overexpression of lipocalin-2 correlated with a lower extent of epithelial-to-mesenchymal transition (<math>p &lt; 0.05</math>), increased E-cadherin expression (<math>p &lt; 0.05</math>), decreased vimentin expression (<math>p &lt; 0.05</math>), and reduced cancer cell migration and invasion in pancreatic cancer, We found that lipocalin 2 could also convert 4T1-Ras-transformed mesenchymal tumor cells to an epithelial phenotype, increase E-cadherin expression, and suppress cell invasiveness <i>in vitro</i> and tumor growth and lung metastases <i>in vivo</i>., Previously, we reported that lipocalin 2 could revert 4T1-ras-transformed mesenchymal tumor cells to a more epithelial phenotype, increase E-cadherin expression, and suppress cell invasiveness <i>in vitro</i> and <i>in vivo</i>, indicating that lipocalin 2 is a metastasis suppressor. &lt;more data available...&gt;</p> | <p>info:pmid/23539193#abs:8,<br/>info:pmid/15691834#abs:2,<br/>info:pmid/17114340#abs:2,<br/>info:pmid/19237579#body:97,<br/>info:pmid/21132267#cont:263,<br/>info:pmid/18768801#body:208,<br/>info:pmid/22075378#body:50,<br/>info:pmid/22328933#cont:250,<br/>info:pmid/17604154#body:86</p> | 2 | 9 | <p>Mesenchyme<br/>{Organ um: agi-ncimorgan:<br/>C0162415}, Basal lamina<br/>{Organ um: agi-ncimorgan:<br/>C0085872}</p> |

|                     |            |                                                                                                                                                                                                                                                                                                                                                                                                                                                                                                                                                                                                                                                                                                                                          |                                                                                                                                                       |   |   |                                                                                                                |
|---------------------|------------|------------------------------------------------------------------------------------------------------------------------------------------------------------------------------------------------------------------------------------------------------------------------------------------------------------------------------------------------------------------------------------------------------------------------------------------------------------------------------------------------------------------------------------------------------------------------------------------------------------------------------------------------------------------------------------------------------------------------------------------|-------------------------------------------------------------------------------------------------------------------------------------------------------|---|---|----------------------------------------------------------------------------------------------------------------|
| HIF1A --- <br>THBS1 | Expression | When the cells were cultured under hypoxic conditions, mRNA and protein levels of TSP-1, and mRNA levels of integrin beta(3) were increased with the increase in HIF-1alpha protein., Present studies with human umbilical vein endothelial cells suggest that MCPIP-induced angiogenesis is mediated via hypoxia-inducible factor (HIF-1a), vascular endothelial growth factor (VEGF), and silent information regulator (SIRT-1) induction that results in the inhibition of angiogenesis inhibitor thrombospondin-1., HIF1-a has been shown to induce pro-angiogenic programs through modulation of a variety of molecules including but not limited to VEGF, FLT1, ANGPT2, THBS1 and CYR61 [29-31,33,37,38]. <more data available...> | info:pmid/18384112#abs:4,<br>info:pmid/24048733#abs:3,<br>info:pmid/23922772#cont:347,<br>info:pmid/24412200#body:235,<br>info:pmid/23164805#body:187 | 2 | 5 | Coronary artery {Organ urn: agi-ncimorgan: C1269008},<br>Ground substance {Organ urn: agi-ncimorgan: C138350 } |
| CLDN7 --- <br>MMP3  | Expression | Deletion of claudin-7 also markedly up-regulated the expression levels of MMP-3 and MMP-7, which could cause intestinal tissue damage and inflammation.                                                                                                                                                                                                                                                                                                                                                                                                                                                                                                                                                                                  | info:pmid/22044670#body:145                                                                                                                           | 2 | 1 | Intestines {Organ urn: agi-ncimorgan: C0021853}                                                                |
| MMP3 ---><br>CLDN7  | Expression | Intestines of Cldn7 (-/-) mice produced significantly higher levels of cytokines, the nuclear factor ?B p65 subunit, and cyclooxygenase 2; they also up-regulated expression of matrix metalloproteinases -3 and -7. small interfering RNA in epithelial cell lines showed that the increased expression of MMP-3 resulted directly from claudin-7 depletion, whereas that of MMP-7 resulted from inflammation.                                                                                                                                                                                                                                                                                                                          | info:pmid/22044670#abs:8                                                                                                                              | 2 | 1 | Intestines {Organ urn: agi-ncimorgan: C0021853}                                                                |
| GLIPR2 --- <br>CDH1 | Expression | The epithelial-to-mesenchymal transition PCR Array analysis indicated that GLIPR-2 overexpression in HK-2 cells increased E-cadherin expression but decreased vimentin expression., An <i>in vitro</i> assay suggests that GLIPR-2 can promote epithelial cells to become more like fibroblasts, both by changes in morphology and decreased expression of E-cadherin.                                                                                                                                                                                                                                                                                                                                                                   | info:pmid/23516513#cont:280,<br>info:pmid/17055234#body:97                                                                                            | 2 | 2 | Mesenchyme {Organ urn: agi-ncimorgan: C0162415}                                                                |
| GLIPR2 ---><br>VIM  | Expression | Expression of vimentin did not appear to be significantly increased in the presence of GLIPR-2 conditioned medium., The epithelial-to-mesenchymal transition PCR Array analysis indicated that GLIPR-2 overexpression in HK-2 cells increased E-cadherin expression but decreased vimentin expression.                                                                                                                                                                                                                                                                                                                                                                                                                                   | info:pmid/17055234#body:60,<br>info:pmid/23516513#cont:280                                                                                            | 2 | 2 | Mesenchyme {Organ urn: agi-ncimorgan: C0162415}                                                                |
| LCN2 ---><br>HIF1A  | Expression | The regulation of HIF-1a and VEGF by Lcn2 was also demonstrated in the aggressive MDA-MB-231 cell line., Furthermore, LCN2 promotes expression of VEGF and HIF1A which contribute to enhanced vascularity., However, on the contrary, some studies have demonstrated that NGAL can inhibit the pro-neoplastic factor HIF-1alpha, FA-Kinase phosphorylation and also VEGF synthesis, thus suggesting that, in alternative conditions, NGAL also, paradoxically, has an anti-tumoral and anti-metastatic effect in neoplasias of, for example, the colon, ovary and pancreas. <more data available...>                                                                                                                                     | info:pmid/22982376#abs:7,<br>info:pmid/23056397#abs:8,<br>info:pmid/19540040#abs:5,<br>info:pmid/23022179#body:292                                    | 2 | 4 | Colon {Organ urn: agi-ncimorgan: C1281569},<br>Breast {Organ urn: agi-ncimorgan: C0006141 }                    |

|                                                          |            |                                                                                                                                                                                                                                                                                                                                                                                                                                                                                                                                                                                                                                                                                                                                                                                                                                                         |                                                                                                                                                             |   |   |                                                                                                                                                                 |
|----------------------------------------------------------|------------|---------------------------------------------------------------------------------------------------------------------------------------------------------------------------------------------------------------------------------------------------------------------------------------------------------------------------------------------------------------------------------------------------------------------------------------------------------------------------------------------------------------------------------------------------------------------------------------------------------------------------------------------------------------------------------------------------------------------------------------------------------------------------------------------------------------------------------------------------------|-------------------------------------------------------------------------------------------------------------------------------------------------------------|---|---|-----------------------------------------------------------------------------------------------------------------------------------------------------------------|
| HIF1A ---><br>LCN2                                       | Expression | (D) Hif-1 $\alpha$ silencing partially overcomes EGFR-induced Lcn2 upregulation., epidermal growth factor-induced Lcn2 expression was found to be mediated through stabilization of the transcription factor hypoxia inducible factor-1 $\alpha$ (HIF-1 $\alpha$ ).                                                                                                                                                                                                                                                                                                                                                                                                                                                                                                                                                                                     | info:pmid/20921623#cont:245,<br>info:pmid/22513004#body:614,<br>info:doi/10.1016/j.bbcan.2012.03.008#body:614                                               | 2 | 3 | Kidney {Organ um:<br>agi-ncimorgan: C1278978},<br>Nephrons {Organ um:<br>agi-ncimorgan: C0027713}                                                               |
| LCN2 ---> VIM                                            | Expression | Incubation of Human peritoneal mesothelial cell with recombinant NGAL reversed the transforming growth factor-beta-induced up-regulation of Snail and vimentin but rescued the down-regulation of E-cadherin., Overexpression of lipocalin-2 correlated with a lower extent of epithelial-to-mesenchymal transition ( $p < 0.05$ ), increased E-cadherin expression ( $p < 0.05$ ), decreased vimentin expression ( $p < 0.05$ ), and reduced cancer cell migration and invasion in pancreatic cancer., To investigate the function of Lcn2 in breast cancer progression, Lcn2 was overexpressed in human breast cancer cells and was found to up-regulate mesenchymal markers, including vimentin and fibronectin, down-regulate the epithelial marker E-cadherin, and significantly increase cell motility and invasiveness. <more data available...> | info:pmid/19148711#abs:7,<br>info:pmid/23539193#abs:8,<br>info:pmid/19237579#abs:3,<br>info:pmid/22075378#body:50                                           | 2 | 4 | Peritoneum {Organ um:<br>agi-ncimorgan: C0496954},<br>Mesenchyme {Organ um:<br>agi-ncimorgan: C0162415},<br>Basal lamina {Organ um:<br>agi-ncimorgan: C0085872} |
| FAS --- <br>PDGFRA                                       | Expression | Expression of PDGFRA was decreased following GANT-61 treatment with concomitant increase in Fas. It is interesting to note that the expression of PDGFRA was decreased following GDC-0449 treatment with concomitant increase in Fas.                                                                                                                                                                                                                                                                                                                                                                                                                                                                                                                                                                                                                   | info:pmid/23200667#body:135,<br>info:pmid/22087285#cont:117                                                                                                 | 2 | 2 |                                                                                                                                                                 |
| PDGFRA ---><br>FAS                                       | Regulation | Analysis of the molecular mechanisms of GANT61-induced cytotoxicity in HT29 cells showed increased Fas expression and decreased expression of PDGFRA, which also regulates Fas. Analysis of the molecular mechanisms of GDC-0449-induced cell death in cancer stem cells showed increased Fas expression and decreased expression of PDGFRA, which also regulates Fas.                                                                                                                                                                                                                                                                                                                                                                                                                                                                                  | info:pmid/21135115#abs:7,<br>info:pmid/22087285#cont:128                                                                                                    | 2 | 2 |                                                                                                                                                                 |
| KRT18 --+><br>epithelial to<br>mesenchymal<br>transition | Regulation | Using protein immunoblotting, we confirmed that MCF-7-Six1 lines contained increased levels of the mesenchymal protein fibronectin and decreased levels of the epithelial proteins cytokeratin 18, claudin-1, and claudin-8 (Figure 3B and Supplemental Figure 2), consistent with a Six1-induced epithelial-mesenchymal transition.                                                                                                                                                                                                                                                                                                                                                                                                                                                                                                                    | info:pmid/19726885#body:133                                                                                                                                 | 2 | 1 | Mesenchyme {Organ um:<br>agi-ncimorgan: C0162415}                                                                                                               |
| TGFBR3 ---><br>cell invasion                             | Regulation | Knockdown of TGFBR3 decreases cell invasion through Matrigel., Betaglycan expression decreases granulosa cell invasion through Matrigel., Furthermore, Hyaluronic acid-stimulated epicardial cell invasion required Tgfb $\beta$ 3.112. As we have previously demonstrated, TGFBR3 is frequently downregulated during cancer progression and suppresses tumor cell invasion and metastasis in a cell-autonomous manner (25, 26)., Specifically, four of these genes (Paw1, Per1, Igfbp6 and Thbd) negatively regulate cell proliferation and growth, and three genes (Rgs4, Nov and Tgfb $\beta$ 3) negatively regulate cell invasion (Table 3).                                                                                                                                                                                                        | info:pmid/23835618#cont:249,<br>info:pmid/19164448#body:185,<br>info:pmid/22679138#cont:412,<br>info:pmid/23925295#cont:361,<br>info:pmid/22048456#cont:151 | 2 | 5 | Epicardium {Organ um:<br>agi-ncimorgan: C0225968},<br>Synovial Membrane<br>{Organ um: agi-ncimorgan:<br>C0039099}                                               |

|                                                  |            |                                                                                                                                                                                                                                                                                                                                                                                                                                                                                                                                                                                                                                                          |                                                                                                                                                                           |   |   |                                                           |
|--------------------------------------------------|------------|----------------------------------------------------------------------------------------------------------------------------------------------------------------------------------------------------------------------------------------------------------------------------------------------------------------------------------------------------------------------------------------------------------------------------------------------------------------------------------------------------------------------------------------------------------------------------------------------------------------------------------------------------------|---------------------------------------------------------------------------------------------------------------------------------------------------------------------------|---|---|-----------------------------------------------------------|
| KRT18 ---> cell migration                        | Regulation | Prior studies have shown that Keratin 8 and K18 regulate cell migration in various cell types including OSCC [14,33,34]., Keratin 8 and 18 loss in epithelial cancer cells increases collective cell migration and cisplatin sensitivity through claudin1 up-regulation., We thus sought to assess to which extent the K8/K18 loss affects hepatoma cell migration and whether it occurs through a novel protein kinase C mediation., Taken together these results suggest that K8 and K18 promote the cell migration and neoplastic progression by modulating 74-integrin-mediated signalling in oral squamous cell carcinoma. <more data available...> | info:pmid/22114688#cont:318, info:pmid/23449973#title:1, info:pmid/20357007#body:187, info:pmid/21610092#cont:291, info:pmid/10801882#body:49, info:pmid/23907942#cont:36 | 2 | 6 |                                                           |
| ST14 ---  apoptosis                              | Regulation | MT-SP1 inhibition may result in the observed inhibition of differentiation and/or increased apoptosis., The data presented in this paper show that Matrilase/MT-SP1 has a pivotal role in thymocyte survival by suppressing apoptosis.                                                                                                                                                                                                                                                                                                                                                                                                                   | info:pmid/10500122#body:283, info:pmid/12032844#body:224                                                                                                                  | 2 | 2 | prostate ventral lobe {Organ um: agi-ncimorgan: C2700158} |
| FLT1 ---> MMP2                                   | Regulation | VEGF has been shown to regulate MMP-2 expression in several cell lines.5 Taken together, these findings suggest that swimming training likely provides these beneficial effects on ischemic revascularization in aged mice through VEGF/Flt-1-mediated MMP-2 activation induced by stimulation of insulin-like growth factor-1/phosphatidylinositol 3-kinase/Akt-dependent hypoxia-induced factor-1a synthesis and prevention of hypoxia-induced factor-1a destabilization.                                                                                                                                                                              | info:pmid/20679550#body:139                                                                                                                                               | 2 | 1 |                                                           |
| FLT1 ---> VIM                                    | Expression | Western blotting showed that VEGFR-1 activation led to decreased expression of the epithelial markers E-cadherin and plakoglobin, increased expression of the mesenchymal markers vimentin and N-cadherin, and increased nuclear expression of beta-catenin., Moreover, VEGFR1 activation leads to down-regulation of the expression of E-cadherin and plakoglobin, and to up-regulation of mesenchymal vimentin and N-cadherin.                                                                                                                                                                                                                         | info:pmid/16397214#abs:5, info:pmid/20890584#cont:81                                                                                                                      | 2 | 2 | Mesenchyme {Organ um: agi-ncimorgan: C0162415}            |
| THBS1 ---  ST14                                  | Expression | Incubations with Human platelet TSP1 at 100 µg/ml resulted in greater inhibition of degradation of labeled mTSP1 or mouse TSP2. 3T3 cells appeared necrotic after incubation with Human platelet TSP1 at concentrations higher than 150 µg/ml.                                                                                                                                                                                                                                                                                                                                                                                                           | info:pmid/8663244#body:173                                                                                                                                                | 2 | 1 |                                                           |
| ST14 ---> CLDN7                                  | Expression | Alternatively, the expression levels of matrilase may affect the expression levels of claudin-7.                                                                                                                                                                                                                                                                                                                                                                                                                                                                                                                                                         | info:pmid/21310043#cont:323                                                                                                                                               | 2 | 1 |                                                           |
| PDGFRA ---> epithelial to mesenchymal transition | Regulation | We previously showed that there was a relation between WTI and Pdgrfa, which may affect the process of epithelial-to-mesenchymal transformation [7]., In addition, platelet-derived growth factor family receptors was shown to be important for maintenance of epithelial-mesenchymal transition, evasion of apoptosis, and metastasis in transformed mesenchymal murine mammary cells.                                                                                                                                                                                                                                                                 | info:pmid/21516490#cont:285, info:pmid/22070644#cont:30                                                                                                                   | 2 | 2 | Mesenchyme {Organ um: agi-ncimorgan: C0162415}            |

|                                                          |                 |                                                                                                                                                                                                                                                                                                                                                                      |                                                             |   |   |                                                    |
|----------------------------------------------------------|-----------------|----------------------------------------------------------------------------------------------------------------------------------------------------------------------------------------------------------------------------------------------------------------------------------------------------------------------------------------------------------------------|-------------------------------------------------------------|---|---|----------------------------------------------------|
| HIF1A ---><br>IGF2BP1                                    | PromoterBinding | Hypoxic stimulation transcriptionally regulates CRD-BP by facilitating the acetylation of histones within the CRD-BP gene and by modulating the extent of HIF1a binding to the CRD-BP promoter.                                                                                                                                                                      | info:pmid/23038779#abs:4                                    | 2 | 1 |                                                    |
| IGF2BP1 --- <br>cell invasion                            | Regulation      | Here, we show that in both T47D and MDA231 human breast carcinoma cells IMP1/ZBP1 functions to suppress cell invasion.                                                                                                                                                                                                                                               | info:pmid/22266909#abs:5                                    | 2 | 1 |                                                    |
| PDGFRA --+><br>cell invasion                             | Regulation      | Furthermore, suppression of PDGFRA and PLCG1 is involved in miR-218-2-induced inhibition of thyroid cancer cell invasion and growth., (D) Impact of Dyn2 knockdown on PDGFRA-promoted LN444 glioma growth, invasion, cell proliferation and apoptosis <i>in vivo</i> .                                                                                               | info:pmid/23270784#cont:190,<br>info:pmid/21996738#cont:292 | 2 | 2 | Fetus {Organ urn:<br>agi-ncimorgan: C1305737}      |
| HIF1A ---><br>NQO1                                       | Regulation      | Ethanol-induced HO-1 and NQO1 are differentially regulated by HIF-1alpha and Nrf2 to attenuate inflammatory cytokine expression., Ethanol-induced HO-1 and NQO1 are differentially regulated by HIF-1a and Nrf2 to attenuate inflammatory cytokine expression.                                                                                                       | info:pmid/20833713#title:1,<br>info:pmid/23294312#cont:1105 | 2 | 2 | Cerebellum {Organ urn:<br>agi-ncimorgan: C1268981} |
| IGF2BP1 ---><br>CDH1                                     | Expression      | IMP1/ZBP1 facilitates the localization of E-cadherin and b-actin mRNAs at cell-cell contacts                                                                                                                                                                                                                                                                         | info:pmid/22266909#cont:85                                  | 2 | 1 |                                                    |
| TXNIP --- <br>cell migration                             | Regulation      | dipeptidyl peptidase-4, KLF4 and thioredoxin interacting protein instead inhibit cell migration and invasion and induce cell cycle arrest [37-39].                                                                                                                                                                                                                   | info:pmid/22328933#cont:251                                 | 2 | 1 |                                                    |
| EGLN3 ---><br>epithelial to<br>mesenchymal<br>transition | Regulation      | In this case, downregulation of PHD3 expression following hypoxia and/or cytokine-mediated epithelial-to-mesenchymal transition may have evolved to disengage PHD3-mediated hydroxylation, and allow for cell cytoskeletal changes necessary for cell motility.                                                                                                      | info:pmid/24367580#cont:346                                 | 2 | 1 |                                                    |
| HIF1A --+><br>PDGFRA                                     | PromoterBinding | At first approximation, this would seem contrary to the results showing that hypoxia-inducible factor1a and hypoxia-inducible factor2a specifically regulate PDGFRa and FAK.                                                                                                                                                                                         | info:pmid/23563312#cont:166                                 | 2 | 1 |                                                    |
| GLIPR2 --+><br>cell migration                            | Regulation      | These findings suggest that GLIPR-2 may be involved in proximal tubular cell epithelial-to-mesenchymal transition to promote cell migration.                                                                                                                                                                                                                         | info:pmid/23516513#cont:296                                 | 2 | 1 |                                                    |
| ST14 --+><br>MMP2                                        | Regulation      | Although our study did not determine this as a direct proteolytic activation by matrilysin, the presence of matrilysin is clearly required for MMP2 activation.                                                                                                                                                                                                      | info:pmid/21149451#cont:409                                 | 2 | 1 |                                                    |
| EGLN3 ---><br>cell migration                             | Regulation      | The presence of stress fibres and phosphorylated FAK is a marker of focal adhesions that anchor the F-actin filaments to transmembrane proteins and mediate communication with the cell's environment suggesting that PHD3 as oxygen sensor also influences tumour cell invasion and possibly cell migration with the biological function of escaping hypoxic areas. | info:pmid/20978507#cont:582                                 | 2 | 1 |                                                    |

|                          |            |                                                                                                                                                                                                                                                                                                                                                                                                                                                                                                                          |                                 |   |   |                                                  |
|--------------------------|------------|--------------------------------------------------------------------------------------------------------------------------------------------------------------------------------------------------------------------------------------------------------------------------------------------------------------------------------------------------------------------------------------------------------------------------------------------------------------------------------------------------------------------------|---------------------------------|---|---|--------------------------------------------------|
| NQO1 --> THBS1           | Regulation | Several mRNAs, such as those encoding CYP1B1, IL8, neuronal pentraxin 1, plasminogen activator inhibitor 2, PTGS2, NQO1, signal transducer and activator of transcription 1, transforming growth factor, beta-induced, thrombospondin 1, TNFRSF11B, and WNT5A, were induced in both types of cells by the Ahr ligands 2,3,7,8- tetrachlorodibenzo- p-dioxin and polychlorinated biphenyl-126, and the fold induction of expression was generally higher in precursors than in adipocytes [see Supplemental Material, ... | info:pmid/22262711#cont:303     | 2 | 1 |                                                  |
| SOD3 ---> cell invasion  | Regulation | Therefore, nonmetastatic 67NR cells that express a higher mH2A1.1-to-mH2A1.2 ratio than metastatic 4T1 cells might be able to adapt their genetic programs to redox metabolism by expressing genes such as SOD3, which would in turn affect cell invasiveness.                                                                                                                                                                                                                                                           | info:pmid/23022728#cont:717     | 2 | 1 |                                                  |
| EGLN3 ---> cell invasion | Regulation | PHD3 modulates tumour cell growth, invasion and cell morphology                                                                                                                                                                                                                                                                                                                                                                                                                                                          | info:pmid/20978507#cont:195     | 2 | 1 | Pancreas {Organ urn: agi-ncimorgan: C1278931}    |
| ESRP1 ---> CDH1          | Expression | Esrp1 silencing resulted in significantly decreased levels of E-cadherin after 3-d silencing (Fig. 5B).                                                                                                                                                                                                                                                                                                                                                                                                                  | info:pmid/22585092#cont:137     | 2 | 1 |                                                  |
| CDH1 --> ESRP1           | Expression | Interestingly, examination components. of the microarray data (Sup. Table 1) revealed that expression of Upon Slug expression in UM-SCC-38 cells, we observed an ESRP1 and ESRP2 mRNA were decreased in UM-SCC-38/sluc expected reduction in E-cadherin expression and a striking loss cells compared to control cells in agreement with the observed of E-cadherin localization of the remaining E-cadherin from alternative splicing of the p120 mRNA.                                                                 | info:embase/2011455233#cont:113 | 2 | 1 |                                                  |
| KRT14 ---  NQO1          | Regulation | Relative to normal corneal epithelial proteins, six keratoconus epithelial proteins (lamin-A/C, keratin type I cytoskeletal 14, tubulin beta chain, heat shock cognate 71 kDa protein, keratin type I cytoskeletal 16 and protein S100-A4) exhibited up-regulation and five proteins (transketolase, pyruvate kinase, 14-3-3 sigma isoform, phosphoglycerate kinase 1, and NADPH dehydrogenase (quinone) 1) showed down-regulation.                                                                                      | info:pmid/21281627#abs:5        | 2 | 1 | Cornea {Organ urn: agi-ncimorgan: C1550625}      |
| NQO1 ---  KRT14          | Regulation | In this report, we demonstrate that inactivation of NQO1 gene in mice led to the loss of cytokeratin 14 (K14), an early marker of skin differentiation and thinning of skin epithelium.                                                                                                                                                                                                                                                                                                                                  | info:pmid/21042282#cont:36      | 2 | 1 | Skin {Organ urn: agi-ncimorgan: C0684084}        |
| TXNIP ---  VIM           | Regulation | Consistently, the depletion of E-Cadherin, an epithelial marker, was quickened, and similarly the induction of vimentin, a mesenchymal marker, was elevated in Thioredoxin Binding Protein-2 knockdown-A549 cells (Fig. 6).                                                                                                                                                                                                                                                                                              | info:pmid/227268160#cont:93     | 2 | 1 | Mesenchyme {Organ urn: agi-ncimorgan: C0162415}  |
| LCN2 ---- THBS1          | Binding    | DNMT1 is nuclear, but reported to co-localize with annexin V. Lipoic acid is decreased by 1.29 fold and is also negatively associated with THBS1, which is increased by 2.13 fold and identified as a binding partner of ELA2.                                                                                                                                                                                                                                                                                           | info:pmid/21853032#cont:153     | 2 | 1 | Bone Marrow {Organ urn: agi-ncimorgan: C0005953} |

|                             |                  |                                                                                                                                                                                                                                                                                                                                                                                                                                                                                                                                                                                                                                                      |                                                                                                                                                                                      |   |   |                                                                                                    |
|-----------------------------|------------------|------------------------------------------------------------------------------------------------------------------------------------------------------------------------------------------------------------------------------------------------------------------------------------------------------------------------------------------------------------------------------------------------------------------------------------------------------------------------------------------------------------------------------------------------------------------------------------------------------------------------------------------------------|--------------------------------------------------------------------------------------------------------------------------------------------------------------------------------------|---|---|----------------------------------------------------------------------------------------------------|
| FLT1 ---><br>CDHI           | Expression       | Western blotting showed that VEGFR-1 activation led to decreased expression of the epithelial markers E-cadherin and plakoglobin, increased expression of the mesenchymal markers vimentin and N-cadherin, and increased nuclear expression of beta-catenin., Moreover, VEGFR1 activation leads to down-regulation of the expression of E-cadherin and plakoglobin, and to up-regulation of mesenchymal vimentin and N-cadherin., VEGFR-1 activation led to reduced E-cadherin expression while EMT-associated transcription factors (Snail, Slug, Twist) and mesenchymal markers vimentin and N-cadherin were upregulated. <more data available...> | info:pmid/16397214#abs:5,<br>info:pmid/20890584#cont:81,<br>info:pmid/21492078#cont:110,<br>info:pmid/23776453#cont:595                                                              | 2 | 4 | Mesenchyme {Organ urn: agi-ncimorgan: C0162415}                                                    |
| WNT4 ---><br>CDHI           | Expression       | Further studies found that the expression of cell polarity associated genes (Par6b and E-cadherin) and Wnt signaling genes (Wnt4, Wnt11) were downregulated in Wt1 deficient SCs, and that the expression of Par6b and E-cadherin was regulated by Wnt4.                                                                                                                                                                                                                                                                                                                                                                                             | info:pmid/23935527#abs:8                                                                                                                                                             | 2 | 1 | Testis {Organ urn: agi-ncimorgan: C1278981}                                                        |
| PDGFRA ---><br>MMP3         | Expression       | Our studies show that PDGFR-alpha induced MMP3 gene expression and increased cell proliferation and cell migration upon stimulation by platelet-derived growth factor -AA., We investigated PDGF-alpha receptor - and beta receptor -mediated signaling pathways for the expression of MMP-3 and invasion activity using porcine aortic endothelial cells with stable expression of normal or mutated Platelet-derived growth factor receptors.                                                                                                                                                                                                      | info:pmid/14519668#abs:6,<br>info:pmid/12051699#abs:3                                                                                                                                | 2 | 2 | Nervous system {Organ urn: agi-ncimorgan: C0027763},<br>Aorta {Organ urn: agi-ncimorgan: C1278934} |
| TXNIP ---  cell<br>invasion | Regulation       | VDUP1 suppressed cell invasiveness and tumor metastasis, which were also recovered by blocking of nuclear export.                                                                                                                                                                                                                                                                                                                                                                                                                                                                                                                                    | info:pmid/18062927#abs:5                                                                                                                                                             | 2 | 1 |                                                                                                    |
| EGLN3 --- <br>HIF1A         | ProtModification | Consequently, in hypoxia Siah determines the availability of PHD1/3, which otherwise modify HIF-1alpha to enable its association-dependent degradation by pVHL., Although PHD1 and PHD3 can hydroxylate HIF-1a <i>in vitro</i> , HIF does not appear to be their physiological target in the cell (3),. During normoxia, the HIF-1alpha subunit is hydroxylated on two prolines by three recently identified prolyl hydroxylases (PHD1, PHD2, and PHD3) (13-17), HIF-1a can also be regulated at the protein level by the oxygen-dependent hydroxylation of HIF-1a by specific prolyl hydroxylases (PHD1-PHD3). <more data available...>             | info:pmid/15492505#abs:5,<br>info:pmid/18463229#body:64,<br>info:pmid/12888568#body:69,<br>info:pmid/18202012#body:72,<br>info:pmid/12615973#body:63,<br>info:pmid/16815840#body:175 | 2 | 6 |                                                                                                    |
